# Supplementary material for: Synthesis and electronic properties of bridged [8]-, [12]- and [16]-cyclo-para-phenylenes
Source: Royal Society of Chemistry journal article supplement (doi:10.1039/d2tc00881e), 2022-01-01
Supplement: d2tc00881e1.pdf [file d2tc00881e1.pdf]

# Synthesis and electronic properties of bridged [8]-, [12]- and [16]-cyclo-*para*-phenylenes

Fabien Lucas,<sup>a</sup> Joëlle Rault-Berthelot,<sup>a</sup> Cassandre Quinton,<sup>a\*</sup> Cyril Poriel<sup>a\*</sup>

[a] Univ Rennes, CNRS, ISCR-6226, F-35000 Rennes, France.

Email : cyril.poriel@univ-rennes1.fr, cassandre.quinton@univ-rennes1.fr

|      |                                                    |     |
|------|----------------------------------------------------|-----|
| 1    | General information .....                          | 2   |
| 1.1. | Synthesis .....                                    | 2   |
| 1.2. | Spectroscopic studies .....                        | 2   |
| 1.3. | Electrochemical studies .....                      | 3   |
| 1.4. | Molecular modelling .....                          | 3   |
| 2    | Synthetic procedures .....                         | 4   |
| 3    | 1D and 2D (COSY and NOESY) NMR spectra .....       | 8   |
| 4    | IR .....                                           | 26  |
| 5    | HRMS .....                                         | 33  |
| 6    | Electrochemical studies .....                      | 40  |
| 7    | Photophysical properties .....                     | 42  |
| 7.1. | Photophysical properties of <b>[12]CPP3N</b> ..... | 43  |
| 7.2. | Photophysical properties of <b>[16]CPP4N</b> ..... | 59  |
| 7.3. | Photophysical properties of <b>[8]CPP4N</b> .....  | 70  |
| 7.4. | Solvatochromic data .....                          | 85  |
| 8    | Theoretical properties .....                       | 86  |
| 9    | Bibliography .....                                 | 114 |

# 1 General information

## 1.1. Synthesis

All manipulations of oxygen and moisture-sensitive materials were conducted with a standard Schlenk technique. All glassware was kept in an oven at 80 °C. Argon atmosphere was generated by three repetitive cycles of vacuum/Argon. Commercially available reagents and solvents were used without further purification other than those detailed below. THF was obtained through a PURE SOLV™ solvent purification system. Light petroleum refers to the fraction with bp 40-60°C. Analytical thin layer chromatography was carried out using aluminum backed plates coated with Merck Kieselgel 60 GF254 and visualized under UV light (at 254 and 360 nm). Flash chromatography was carried out using Teledyne Isco CombiFlash® Rf 400 (UV detection 200-360nm), over standard silica cartridges (Redisep® Isco or Puriflash® columns Interchim). In order to be purified through a recycling size exclusion chromatography apparatus, the compounds were solubilized in HPLC grade chloroform (stabilized with ethanol). Prior to injection, the solution was filtered through a 0.45 µm PTFE filter. Purification was performed on a LC-9160 II NEXT system from the Japan Analytical Industry Co., Ltd. (JAI) equipped with coupled UV-vis 4Ch NEXT through a set of two JAIGEL-2H columns at an elution rate of 10 mL.min<sup>-1</sup> (CHCl<sub>3</sub>). <sup>1</sup>H and <sup>13</sup>C NMR spectra were recorded using Bruker 300 MHz instruments (<sup>1</sup>H frequency, corresponding <sup>13</sup>C frequency: 75 MHz); chemical shifts were recorded in ppm and J values in Hz. The residual signals for the NMR solvents used are 5.32 ppm (proton) and 54.00 ppm (carbon) for CD<sub>2</sub>Cl<sub>2</sub>, 7.26 ppm (proton) and 77.16 ppm (carbon) for CDCl<sub>3</sub> and 77.16 ppm (carbon), 2.09 ppm (proton) for toluene-d<sub>8</sub>. In the <sup>13</sup>C NMR spectra, signals corresponding to C, CH, CH<sub>2</sub> or CH<sub>3</sub> groups, assigned from DEPT experiment, are noted. The following abbreviations have been used for the NMR assignment: s for singlet, d for doublet, t for triplet, q for quadruplet and m for multiplet. High resolution mass spectra were recorded at the Centre Régional de Mesures Physiques de l'Ouest (CRMPO-Rennes) on a Thermo-Fisher Q-Exactive instrument or a Bruker MaXis 4G or a Bruker Ultraflex III.

## 1.2. Spectroscopic studies

Cyclohexane (99+% for spectroscopy, Acros Organics), tetrahydrofuran (THF, 99.5+% for spectroscopy, Acros Organics), dichloromethane (99.8+% for spectroscopy, Acros Organics), acetonitrile (99+% for spectroscopy, Acros Organics), toluene (99+% for spectroscopy, Acros Organics), ethyl acetate (spectroscopic grade, Merck), chloroform (spectroscopic grade, Sigma Aldrich), 1 N solution of sulfuric acid in water (Standard solution, Alfa Aesar) and quinine sulfate dihydrate (99+%, ACROS organics) were used without further purification.

UV-visible spectra were recorded using an UV-Visible spectrophotometer SHIMADZU UV-1605 or a UV-Visible spectrophotometer JASCO FS-110. Molar extinction coefficients (ε) were calculated from the gradients extracted from the plots of absorbance vs concentration with five solutions of different concentrations for each sample and at least two mother solutions were prepared.

$$A = \varepsilon \times l \times C$$

Above, l refers to the path length and C to the sample concentration.

Emission spectra were recorded with a HORIBA Scientific Fluoromax-4 equipped with a Xenon lamp.

Quantum yields in solution (φ<sub>sol</sub>) were calculated relative to quinine sulfate (φ<sub>ref</sub> = 0.546 in H<sub>2</sub>SO<sub>4</sub> 1 N). φ<sub>sol</sub> was determined according to the following equation,

$$\phi_{sol} = \phi_{ref} \times \frac{Grad_s}{Grad_r} \times \left(\frac{\eta_s}{\eta_r}\right)^2$$

where subscripts *s* and *r* refer respectively to the sample and reference, *Grad* is the gradient from the plot of integrated fluorescence intensity vs absorbance,  $\eta$  is the refracting index of the solvent ( $\eta_s = 1.426$  for cyclohexane,  $\eta_s = 1.445$  for chloroform,  $\eta_s = 1.336$  for 1 N solution of sulfuric acid in water). Five solutions of different concentration ( $A < 0.1$ ) of the sample and five solutions of the reference (quinine sulfate) were prepared. The integrated area of the fluorescence peak was plotted against the absorbance at the excitation wavelength for both the sample and reference. The gradients of these plots were then injected in the equation to calculate the reported quantum yield value for the sample.

Absolute quantum yields of films were recorded using a deported HORIBA Scientific Quanta-Phi integrating sphere linked to the Fluoromax-4.

Fluorescent decay measurements were carried out on the HORIBA Scientific Fluoromax-4 equipped with its TCSPC pulsed source interface.

Spin-coated film were prepared from a 1g/mL solution in THF using a Labspins Tournette from Süss Microtec.

IR spectra were recorded on a Bruker Vertex 70 using a diamond crystal MIRacle ATR (Pike).

### 1.3. *Electrochemical studies*

Electrochemical experiments were performed under argon atmosphere using a Pt disk electrode (diameter 1 mm). The counter electrode was a vitreous carbon rod. The reference electrode was either a silver wire in a 0.1 M AgNO<sub>3</sub> solution in CH<sub>3</sub>CN for the studies in oxidation or a Silver wire coated by a thin film of AgI (silver(I)iodide) in a 0.1 M Bu<sub>4</sub>NI solution in DMF for the studies in reduction. Ferrocene was added to the electrolyte solution at the end of a series of experiments. The ferrocene/ferrocenium (Fc/Fc<sup>+</sup>) couple served as internal standard. The three electrodes cell was connected to a potentiostat/galvanostat (Autolab/PGSTAT101) monitored with the Nova 2.1 Software. Activated Al<sub>2</sub>O<sub>3</sub> was added in the electrolytic solution to remove excess moisture. For a further comparison of the electrochemical and optical properties, all potentials are referred to the Fc/Fc<sup>+</sup> system. We estimated the electron affinity (EA) or lowest unoccupied molecular orbital (LUMO) and the ionization potential (IP) or highest occupied molecular orbital (HOMO) from the redox data. The LUMO level was calculated from: LUMO (eV) =  $-[E_{\text{onset}}^{\text{red}} (\text{vs Fc/Fc}^+) + 4.8]$ . Similarly the HOMO level was calculated from: HOMO (eV) =  $-[E_{\text{onset}}^{\text{ox}} (\text{vs Fc/Fc}^+) + 4.8]$ , based on a Fc/Fc<sup>+</sup> energy level of 4.8 eV relative to the vacuum.

### 1.4. *Molecular modelling*

Full geometry optimization of the ground state and vibrational frequency calculation were performed with Density Functional Theory (DFT)<sup>1,2</sup> using the hybrid Becke-3 parameter exchange functional<sup>3-5</sup> and the Lee-Yang-Parr non-local correlation functional<sup>6</sup> (B3LYP) implemented in the Gaussian 16 program suite,<sup>7</sup> using the 6-31G(d) basis set and the default convergence criterion implemented in the program. All stationary points were characterized as minima by analytical frequency calculations.

This work was granted access to the HPC resources of CEA-TGCC under the allocation 2022-[AD010805032R1](http://mesocentre.centralesupelec.fr/) awarded by GENCI and of the “Mésocentre” computing center of CentraleSupélec and École Normale Supérieure Paris-Saclay supported by CNRS and Région Île-de-France (<http://mesocentre.centralesupelec.fr/>).

Figures were generated with GaussView 6.0.

## 2 Synthetic procedures

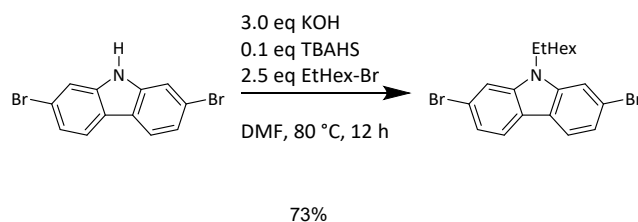

Scheme S 1. Synthesis of 2,7-dibromo-*N*-(2-ethylhexyl)-carbazole

2,7-dibromo-*N*-(2-ethylhexyl)-carbazole: 2,7-Dibromocarbazole (4.00 g, 12.3 mmol, 1.0 eq), KOH (2.07 g, 36.9 mmol, 3.0 eq) and tetrabutylammonium hydrogen sulfate (0.418 g, 1.23 mmol, 0.1 eq) were charged in a Schlenk tube under an argon atmosphere. Then 2-ethylhexyle bromine (5.47 mL, 30.8 mmol, 2.5 eq) and dry DMF (40 mL) were added. The resulting mixture was stirred at 80°C overnight under air. After cooling to RT, a saturated solution of ammonium chloride was added. The organic layer was extracted with CH<sub>2</sub>Cl<sub>2</sub>. The organic layer was then washed with water, brine, dried over MgSO<sub>4</sub>, filtered and concentrated under reduced pressure. After purification with flash chromatography on silica gel [column condition: silica cartridge (40 g); solid deposit on Celite®; λdetection: (254 nm, 280 nm); CH<sub>2</sub>Cl<sub>2</sub>/light petroleum (5/95) at 40 mL/min], the *title compound* was obtained as a white solid (3.92 g, 8.98 mmol); yield 73%; <sup>1</sup>H NMR (300 MHz, CDCl<sub>3</sub>) δ 7.86 (d, *J* = 8.3 Hz, 2H), 7.49 (d, *J* = 1.7 Hz, 2H), 7.33 (dd, *J* = 8.3, 1.7 Hz, 2H), 4.12 – 3.93 (m, 2H), 2.11 – 1.91 (m, 1H), 1.45 – 1.21 (m, 8H), 0.93 – 0.83 (m, 6H) ppm. <sup>13</sup>C NMR (75 MHz, CDCl<sub>3</sub>) δ 142.0 (2C), 122.6 (2CH), 121.5 (2CH), 121.4 (2C), 119.8 (2C), 112.4 (2CH), 47.8 (CH<sub>2</sub>), 39.3 (CH), 30.9 (CH<sub>2</sub>), 28.7 (CH<sub>2</sub>), 24.5 (CH<sub>2</sub>), 23.2 (CH<sub>2</sub>), 14.1 (CH<sub>3</sub>), 11.0 (CH<sub>3</sub>) ppm. IR (ATR platinum) 2959, 2925, 2873, 2858, 1621, 1584, 1483, 1459, 1450, 1425, 1378, 1364, 1342, 1326, 1310, 1297, 1269, 1247, 1225, 1210, 1130, 1067, 1053, 997, 967, 946, 930, 901, 883, 874, 864, 845, 821, 795, 762, 747, 723, 664, 594, 558, 548, 430 cm<sup>-1</sup>. HRMS (ASAP, 130 °C): [M+H]<sup>+</sup> (C<sub>20</sub>H<sub>24</sub>N<sup>79</sup>Br<sub>2</sub>) found 436.0272, required 436.0270. m.p.: 103 °C.

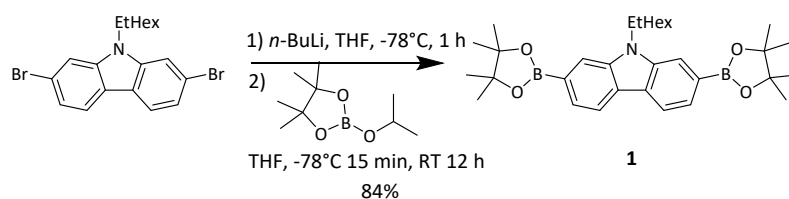

Scheme S 2. Synthesis of **1**

*N*-(2-ethylhexyl)-2,7-bis(4,4,5,5-tetramethyl-1,3,2-dioxaborolan-2-yl)-carbazole **1**: 2,7-dibromo-*N*-(2-ethylhexyl)-carbazole (2.00 g, 4.58 mmol, 1.0 eq) was dissolved in anhydrous THF (340 mL) under an argon atmosphere. The reaction mixture was cooled to -78 °C. A 2.5 M solution of *n*-BuLi in hexanes (20.58 mL, 51.5 mmol, 3.3 eq) was then added dropwise to the solution at -78 °C. The solution was stirred at this temperature for an hour and 2-isopropoxy-4,4,5,5-tetramethyl-1,3,2-dioxaborolane (11.34 mL, 55.6 mmol, 3.5 eq) was added to the mixture and stirred at -78 °C for 15 minutes. The reaction mixture was allowed to warm up to room temperature overnight under stirring. The reaction mixture was quenched with few drops of absolute ethanol and concentrated under reduced pressure. The crude product was dissolved in CH<sub>2</sub>Cl<sub>2</sub>. The organic layer was washed with water, brine, dried over MgSO<sub>4</sub>, filtered and concentrated under reduced pressure. After flash chromatography on silica gel [column conditions: silica cartridge (40 g); solid deposit on Celite®; λdetection: (254 nm, 280 nm); CH<sub>2</sub>Cl<sub>2</sub>/light petroleum (3/7) at 40 mL/min], giving the *title compound* as a white solid (2.04 g, 3.84 mmol); yield 84%; <sup>1</sup>H NMR (300 MHz, CDCl<sub>3</sub>): 8.12 (d, *J* = 7.8 Hz, 2H), 7.88 (s, 2H), 7.67 (d, *J* = 7.8 Hz, 2H), 4.37 – 4.16 (m, 2H), 2.29 – 1.96 (m, 1H), 1.40 – 1.22 (m, 32H), 0.90 (dt, *J* = 7.2, 4.1 Hz, 6H). <sup>13</sup>C NMR

(101 MHz, CDCl<sub>3</sub>) δ 141.1 (2C), 125.2 (4C), 124.9 (2CH), 120.1 (2CH), 115.8 (2CH), 83.9 (4C), 47.3 (CH<sub>2</sub>), 39.3 (CH), 30.8 (CH<sub>2</sub>), 28.6 (CH<sub>2</sub>), 25.1 (8CH<sub>3</sub>), 24.6 (CH<sub>2</sub>), 23.2 (CH<sub>2</sub>), 14.3 (CH<sub>3</sub>), 11.1 (CH<sub>3</sub>) ppm. IR (ATR platinum): 2995, 2978, 2960, 2928, 2869, 1624, 1561, 1500, 1482, 1461, 1449, 1433, 1392, 1380, 1371, 1354, 1337, 1313, 1266, 1252, 1234, 1212, 1167, 1141, 1114, 1076, 1055, 999, 980, 964, 945, 936, 899, 880, 855, 821, 793, 766, 735, 706, 689, 671, 658, 646, 579, 557, 519, 419 cm<sup>-1</sup>. HRMS (ASAP, 140 °C): [M+H]<sup>+</sup> (C<sub>32</sub>H<sub>48</sub>NO<sub>4</sub><sup>11</sup>B<sub>2</sub>) found 532.3771, required 532.3764. m.p.: 109 °C.

2,7-bis(4-bromophenyl)-*N*-(2-ethylhexyl)-carbazole **2**: *N*-(2-ethylhexyl)-2,7-bis(4,4,5,5-tetramethyl-1,3,2-dioxaborolan-2-yl)-carbazole **1** (0.150 g, 0.282 mmol, 1.0 eq), 1-bromo-4-iodobenzene (0.240 g, 0.847 mmol, 3.0 eq), [1,1'-bis(diphenylphosphino)ferrocene]palladium(II) dichloride (0.021 g, 2.82 × 10<sup>-2</sup> mmol, 0.1 eq) and KOH (0.079 g, 1.41 mmol, 5.0 eq) were dissolved in THF (10 mL) under an argon atmosphere. Degassed H<sub>2</sub>O (0.5 mL, 5 %vol) was added and the resulting mixture was stirred at 50 °C for 5h. After cooling to RT, a saturated solution of NH<sub>4</sub>Cl was added and the crude was extracted with CH<sub>2</sub>Cl<sub>2</sub>. The organic layer was washed with H<sub>2</sub>O, dried over MgSO<sub>4</sub>, filtered and solvent was removed under reduced pressure. The residue was further purified with flash chromatography on silica gel [column conditions: silica cartridge (40 g); solid deposit on Celite®; λdetection: (254 nm, 280 nm); CH<sub>2</sub>Cl<sub>2</sub>/light petroleum (5:95) at 40 mL/min], giving the *title compound* as a white solid (0.152 g, 0.258 mmol); yield 91%; <sup>1</sup>H NMR (300 MHz, CD<sub>2</sub>Cl<sub>2</sub>) δ 8.16 (d, *J* = 8.2 Hz, 2H), 7.63 (s, 8H), 7.59 (d, *J* = 1.5 Hz, 2H), 7.46 (dd, *J* = 8.2, 1.5 Hz, 2H), 4.28 (dd, *J* = 7.5, 2.6 Hz, 2H), 2.15 (t, *J* = 6.9 Hz, 1H), 1.48 – 1.20 (m, 8H), 0.94 (t, *J* = 7.4 Hz, 3H), 0.86 (t, *J* = 7.2 Hz, 3H) ppm. <sup>13</sup>C NMR (75 MHz, CD<sub>2</sub>Cl<sub>2</sub>) δ 142.7 (2C), 141.7 (2C), 138.4 (2C), 132.5 (4CH), 129.7 (4CH), 122.6 (2CH), 121.8 (2CH), 121.3 (2C), 119.0 (2C), 108.0 (2CH), 48.0 (CH<sub>2</sub>), 40.0 (CH), 31.5 (CH<sub>2</sub>), 29.4 (CH<sub>2</sub>), 25.1 (CH<sub>2</sub>), 23.6 (CH<sub>2</sub>), 14.4 (CH<sub>3</sub>), 11.3 (CH<sub>3</sub>) ppm. IR (ATR, platinum): 2959, 2924, 2854, 1896, 1625, 1598, 1573, 1557, 1541, 1503, 1481, 1458, 1438, 1396, 1379, 1337, 1301, 1262, 1232, 1215, 1194, 1143, 1116, 1105, 1076, 1057, 1036, 1005, 997, 946, 914, 899, 887, 855, 832, 823, 798, 766, 748, 727, 710, 657, 645, 630, 596, 575, 546, 505, 436, 420 cm<sup>-1</sup>. HRMS (MALDI, DCTB): M<sup>+</sup> found 587.082 for C<sub>32</sub>H<sub>31</sub>N<sup>79</sup>Br<sub>2</sub> required 587.0818. m.p.: 174 °C

*N*-(2-ethylhexyl)-2,7-bis(4-(4,4,5,5-tetramethyl-1,3,2-dioxaborolan-2-yl)phenyl)-carbazole **3**: 2,7-bis(4-bromophenyl)-*N*-(2-ethylhexyl)-carbazole **3** (3.00 g, 5.63 mmol, 1.0 eq), THF (100 mL), *n*-BuLi (6.75 mL, 16.9 mmol, 3.0 eq) and 2-isopropoxy-4,4,5,5-tetramethyl-1,3,2-dioxaborolane (3.67 mL, 18.0 mmol, 3.2 eq). After flash chromatography on silica gel [column conditions: silica cartridge (40 g); solid deposit on Celite®; λdetection: (254 nm, 280 nm); gradient CH<sub>2</sub>Cl<sub>2</sub>/light petroleum from 0 % to 60 % in 80 min at 40 mL/min], giving the *title compound* as a white solid (1.85 g, 2.95 mmol); yield 52 %; <sup>1</sup>H NMR (300 MHz, CD<sub>2</sub>Cl<sub>2</sub>) δ 8.17 (d, *J* = 8.0 Hz, 2H), 7.89 (d, *J* = 8.2 Hz, 4H), 7.76 (d, *J* = 8.2 Hz, 4H), 7.67 (d, *J* = 1.5 Hz, 2H), 7.53 (dd, *J* = 8.1, 1.5 Hz, 2H), 4.38 – 4.23 (m, 2H), 2.17 (t, *J* = 6.5 Hz, 1H), 1.49 – 1.22 (m, 32H), 0.95 (t, *J* = 7.4 Hz, 3H), 0.87 (t, *J* = 7.1 Hz, 3H). ppm. <sup>13</sup>C NMR (75 MHz, CD<sub>2</sub>Cl<sub>2</sub>) δ 145.2 (2C), 142.7 (2C), 139.3 (2C), 135.8 (4CH), 127.3 (4CH), 122.6 (2C), 121.2 (2CH), 119.2 (2CH), 108.3 (2CH), 84.4 (6C), 48.0 (CH<sub>2</sub>), 40.0 (CH), 31.6 (CH<sub>2</sub>), 29.4 (CH<sub>2</sub>), 25.3 (8CH<sub>3</sub>), 25.1 (CH<sub>2</sub>), 23.7 (CH<sub>2</sub>), 14.4 (CH<sub>3</sub>), 11.3 (CH<sub>3</sub>) ppm. IR (ATR, platinum): 2977, 2959, 2926, 2865, 1606, 1547, 1521, 1490, 1458, 1434, 1399, 1357, 1317, 1267, 1251, 1213, 1192, 1166, 1142, 1107, 1089, 1059, 1017, 997, 962, 948, 859, 835, 805, 768, 756, 742, 725, 698, 674, 655, 629, 597, 576, 520, 446 cm<sup>-1</sup>. HRMS (ESI, CH<sub>3</sub>OH/CH<sub>2</sub>Cl<sub>2</sub>: 98/2): [M+H]<sup>+</sup> found 706.4227 for C<sub>44</sub>H<sub>56</sub>NO<sub>4</sub><sup>11</sup>B<sub>2</sub> required 706.42194 m.p.: 191 °C.

[4]cyclo-*para*-9-ethylhexyl-2,7-diphenyl-carbazole **[16]CPP4N**: *N*-(2-ethylhexyl)-2,7-bis(4-(4,4,5,5-tetramethyl-1,3,2-dioxaborolan-2-yl)phenyl)-carbazole **3** (0.250 g, 0.366 mmol, 1.0 eq), cesium fluoride (0.333 g, 2.19 mmol, 6.0 eq) and 1,5-cyclooctadieneplatinum (II) dichloride (0.137 g, 0.366 mmol, 1.0 eq) were dissolved in extra dry DCE (15 mL) under an argon atmosphere and refluxed for 24 h. Solvent was then removed under reduced pressure and the crude product was dried under vacuum at 60°C for 24 h. Triphenylphosphine (1.43 g, 5.49 mmol, 15 eq) was then added to the crude product

and 1,2-dichlorobenzene (30 mL) was added under an argon atmosphere. The resulting mixture was stirred for one hour at room temperature and then refluxed for 48 h. Then, solvent was removed under reduced pressure. The crude product was dissolved in CH<sub>2</sub>Cl<sub>2</sub>. Water was added and the organic layer was extracted with CH<sub>2</sub>Cl<sub>2</sub>, dried over MgSO<sub>4</sub>, filtered and solvent was removed under reduced pressure. The residue was first purified with flash chromatography on silica gel [column conditions: silica cartridge (40 g); solid deposit on Celite®; λdetection (254 nm, 280 nm); gradient dichloromethane/light petroleum 5% to 60 % at 40 mL/min] and second with recycling size exclusion chromatography (CHCl<sub>3</sub>) to give the *title compound* as a pale yellow solid (0.029 g, 1.35 × 10<sup>-2</sup> mmol); yield 15 %. <sup>1</sup>H NMR (500 MHz, CDCl<sub>3</sub>) δ 8.14 (d, *J* = 8.2 Hz, 8H), 7.80 (d, *J* = 8.2 Hz, 16H), 7.70 (d, *J* = 8.3 Hz, 16H), 7.60 (d, *J* = 8.1, 1.5 Hz, 8H), 7.29 (s, 8H), 4.03 (d, *J* = 7.2 Hz, 8H), 2.08 – 2.02 (m, 4H), 1.40 – 1.18 (m, 34H), 0.88 – 0.83 (m, 24H) ppm. <sup>13</sup>C NMR (126 MHz, CDCl<sub>3</sub>) δ 142.4 (8C), 141.6 (8C), 139.0 (8C), 138.5 (8C), 128.3 (16 CH), 127.1 (16CH), 122.0 (8CH), 121.3 (8CH), 117.2 (8C), 110.4 (8CH), 46.9 (4CH<sub>2</sub>), 39.5 (4CH), 31.0 (4CH<sub>2</sub>), 28.8 (4CH<sub>2</sub>), 24.5 (4CH<sub>2</sub>), 23.2 (4CH<sub>2</sub>), 14.2 (4CH<sub>3</sub>), 11.0 (4CH<sub>3</sub>) ppm. IR (ATR, platinum): 3032, 2963, 2930, 2865, 1777, 1738, 1722, 1704, 1689, 1657, 1640, 1630, 1607, 1580, 1563, 1545, 1526, 1509, 1500, 1460, 1438, 1400, 1383, 1356, 1328, 1311, 1255, 1222, 1196, 1134, 1066, 1001, 946, 859, 848, 832, 807, 767, 753, 740, 728, 702, 671, 657, 632, 601, 586, 566, 530, 464, 448, 423 cm<sup>-1</sup>. HRMS (MALDI, DCTB): Found [M<sup>+</sup>], 1716.979, C<sub>128</sub>H<sub>124</sub>N<sub>4</sub> required 1716.98205.

[3]cyclo-*para*-9-ethylhexyl-2,7-diphenyl-carbazole [**12**]CPP3N: The title compound was obtained through the previous synthesis as a second product as a pale yellow solid (0.005 g, 0.28 × 10<sup>-2</sup> mmol); yield 3 %; <sup>1</sup>H NMR (500 MHz, CDCl<sub>3</sub>) δ 8.08 (d, *J* = 8.2 Hz, 6H), 7.82 (d, *J* = 8.7 Hz, 12H), 7.62 – 7.53 (m, 18H), 7.09 (s, 6H), 3.85 – 3.80 (m, 6H), 2.04 – 1.96 (m, 3H), 1.43 – 1.27 (m, 24H), 0.90 – 0.85 (m, 18H) ppm. <sup>13</sup>C NMR (126 MHz, CDCl<sub>3</sub>) δ 142.8 (6C), 141.5 (6C), 139.2 (6C), 137.2 (6C), 128.3 (12CH), 126.4 (12CH), 122.1 (6CH), 121.7 (6CH), 116.9 (6C), 111.6 (6CH), 46.5 (3CH<sub>2</sub>), 39.6 (3CH), 31.0 (3CH<sub>2</sub>), 29.9 (2CH<sub>2</sub>), 28.9 (CH<sub>2</sub>), 24.5(3CH<sub>2</sub>), 23.1 (3CH<sub>2</sub>), 14.2 (3CH<sub>3</sub>), 11.0 (3CH<sub>3</sub>) ppm. IR (ATR, platinum): 3032, 2963, 2929, 2883, 2858, 1895, 1777, 1739, 1721, 1704, 1689, 1657, 1629, 1605, 1563, 1544, 1526, 1509, 1494, 1460, 1437, 1400, 1382, 1355, 1328, 1309, 1258, 1225, 1196, 1133, 1065, 1001, 947, 863, 850, 832, 806, 772, 762, 752, 738, 725, 700, 671, 654, 630, 600, 582, 565, 523, 455 cm<sup>-1</sup>. HRMS (MALDI, DCTB): Found M<sup>+</sup>, 1287.737, C<sub>96</sub>H<sub>93</sub>N<sub>3</sub> required 1287.7364.

[4]cyclo-*para*-9-ethylhexyl-carbazole [**8**]CPP4N: *N*-(2-ethylhexyl)-2,7-bis(4,4,5,5-tetramethyl-1,3,2-dioxaborolan-2-yl)-carbazole **1** (0.250 g, 0.470 mmol, 1.0 eq), cesium fluoride (0.429 g, 2.82 mmol, 6.0 eq) and 1,5-cyclooctadieneplatinum (II) dichloride (0.176 g, 0.470 mmol, 1.0 eq) were dissolved in DCE (20 mL) under an argon atmosphere and refluxed for 24 h. Solvent was then removed under reduced pressure and the crude product was dried under vacuum at 60°C for 24 h. Triphenylphosphine (1.85 g, 7.06 mmol, 15 eq) was then added to the crude product and 1,2-dichlorobenzene (30 mL) was added under an argon atmosphere. The resulting mixture was stirred for one hour at room temperature and then refluxed for 48 h. Then, solvent was removed under reduced pressure. The crude product was dissolved in CH<sub>2</sub>Cl<sub>2</sub>. Water was added and the organic layer was extracted with CH<sub>2</sub>Cl<sub>2</sub>, dried over MgSO<sub>4</sub>, filtered and solvent was removed under reduced pressure. The residue was purified by flash chromatography on silica gel [column conditions: silica cartridge (40 g); solid deposit on Celite®; λdetection (254 nm, 280 nm); dichloromethane/light petroleum (5:95) at 40 mL/min] giving the *title compound* as a yellow solid (47 mg, 4.23 × 10<sup>-2</sup> mmol); yield 36 %; <sup>1</sup>H NMR (300 MHz, CDCl<sub>3</sub>) δ 7.93 (d, *J* = 8.3 Hz, 8H), 7.48 (d, *J* = 8.4 Hz, 8H), 6.53 (s, 8H), 3.43 (d, *J* = 7.1 Hz, 8H), 1.95 – 1.78 (m, 4H), 1.28 (tp, *J* = 15.1, 7.5 Hz, 32H), 0.94 – 0.81 (m, 24H) ppm. <sup>13</sup>C NMR (75 MHz, CDCl<sub>3</sub>) δ 144.2 (4C), 144.0 (4C), 141.9 (4C), 122.2 (4CH), 116.5 (4CH), 115.7 (4CH), 45.9 (4CH<sub>2</sub>), 39.6 (4CH), 30.8 (4CH<sub>2</sub>), 28.9 (4CH<sub>2</sub>), 24.2 (4CH<sub>2</sub>), 23.1 (4CH<sub>2</sub>), 14.2 (4CH<sub>3</sub>), 10.8 (4CH<sub>3</sub>) ppm. IR (ATR platinum) 2957, 2924, 2873, 2854, 1610, 1587, 1560, 1541, 1475, 1449, 1414, 1376, 1346, 1319, 1308, 1253, 1240, 1219, 1190, 1131, 1061, 863,

849, 827, 816, 795, 758, 746, 726, 656, 621, 593, 550, 482, 456, 444  $\text{cm}^{-1}$ . HRMS (ASAP, 300 °C): Found  
[M+H]<sup>+</sup>, 1109.7390, C<sub>80</sub>H<sub>93</sub>N<sub>4</sub> required 1109.7395. m.p. > 350 °C.

### 3 1D and 2D (COSY and NOESY) NMR spectra

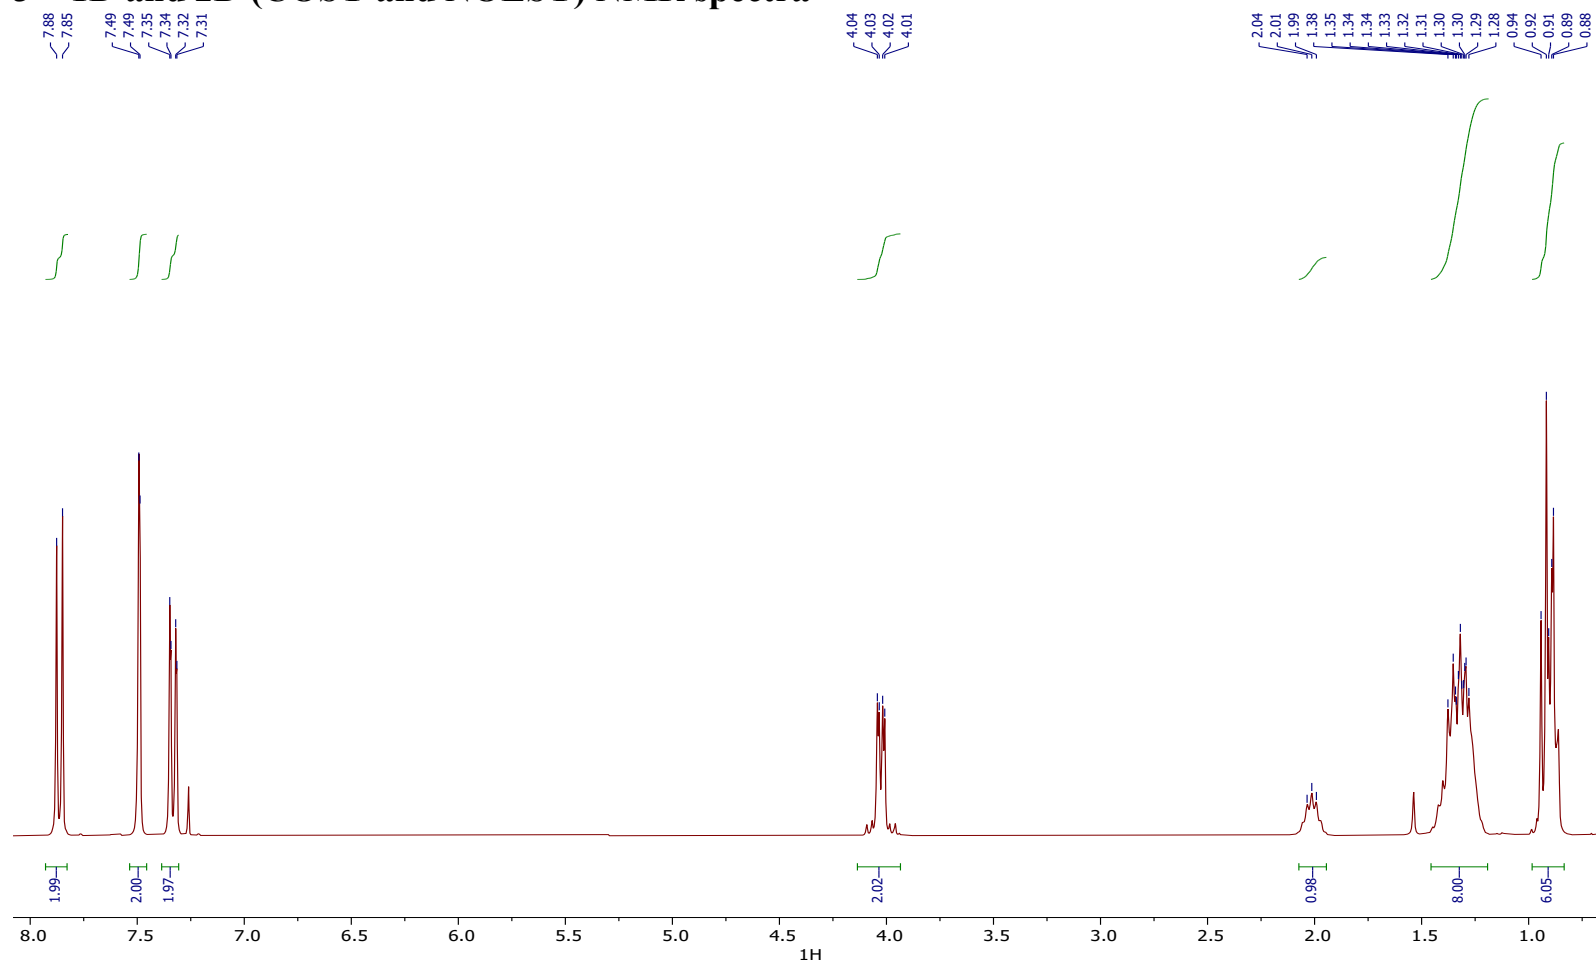

Figure S 1 1D  $^1\text{H}$  NMR spectrum of 2,7-dibromo-N-(2-ethylhexyl)-carbazole in  $\text{CDCl}_3$



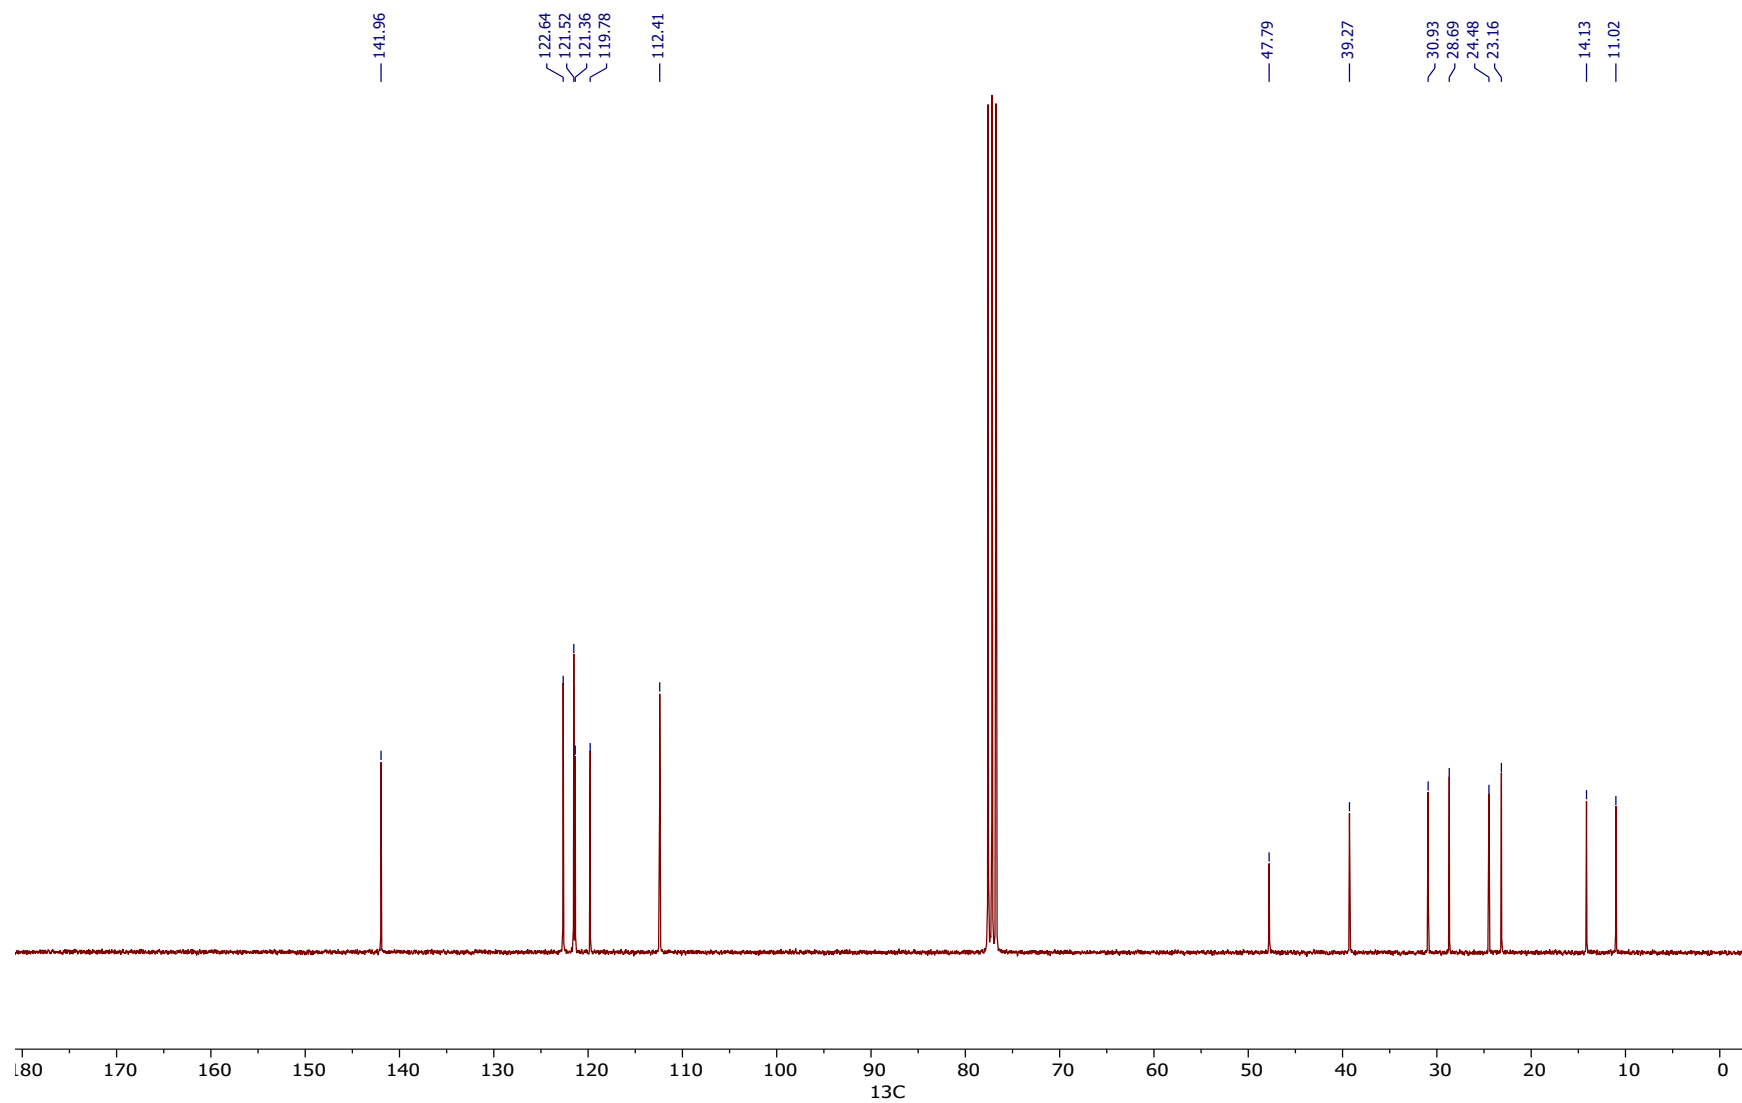

Figure S 2 1D <sup>13</sup>C NMR spectrum of 2,7-dibromo-N-(2-ethylhexyl)-carbazole in CDCl<sub>3</sub>

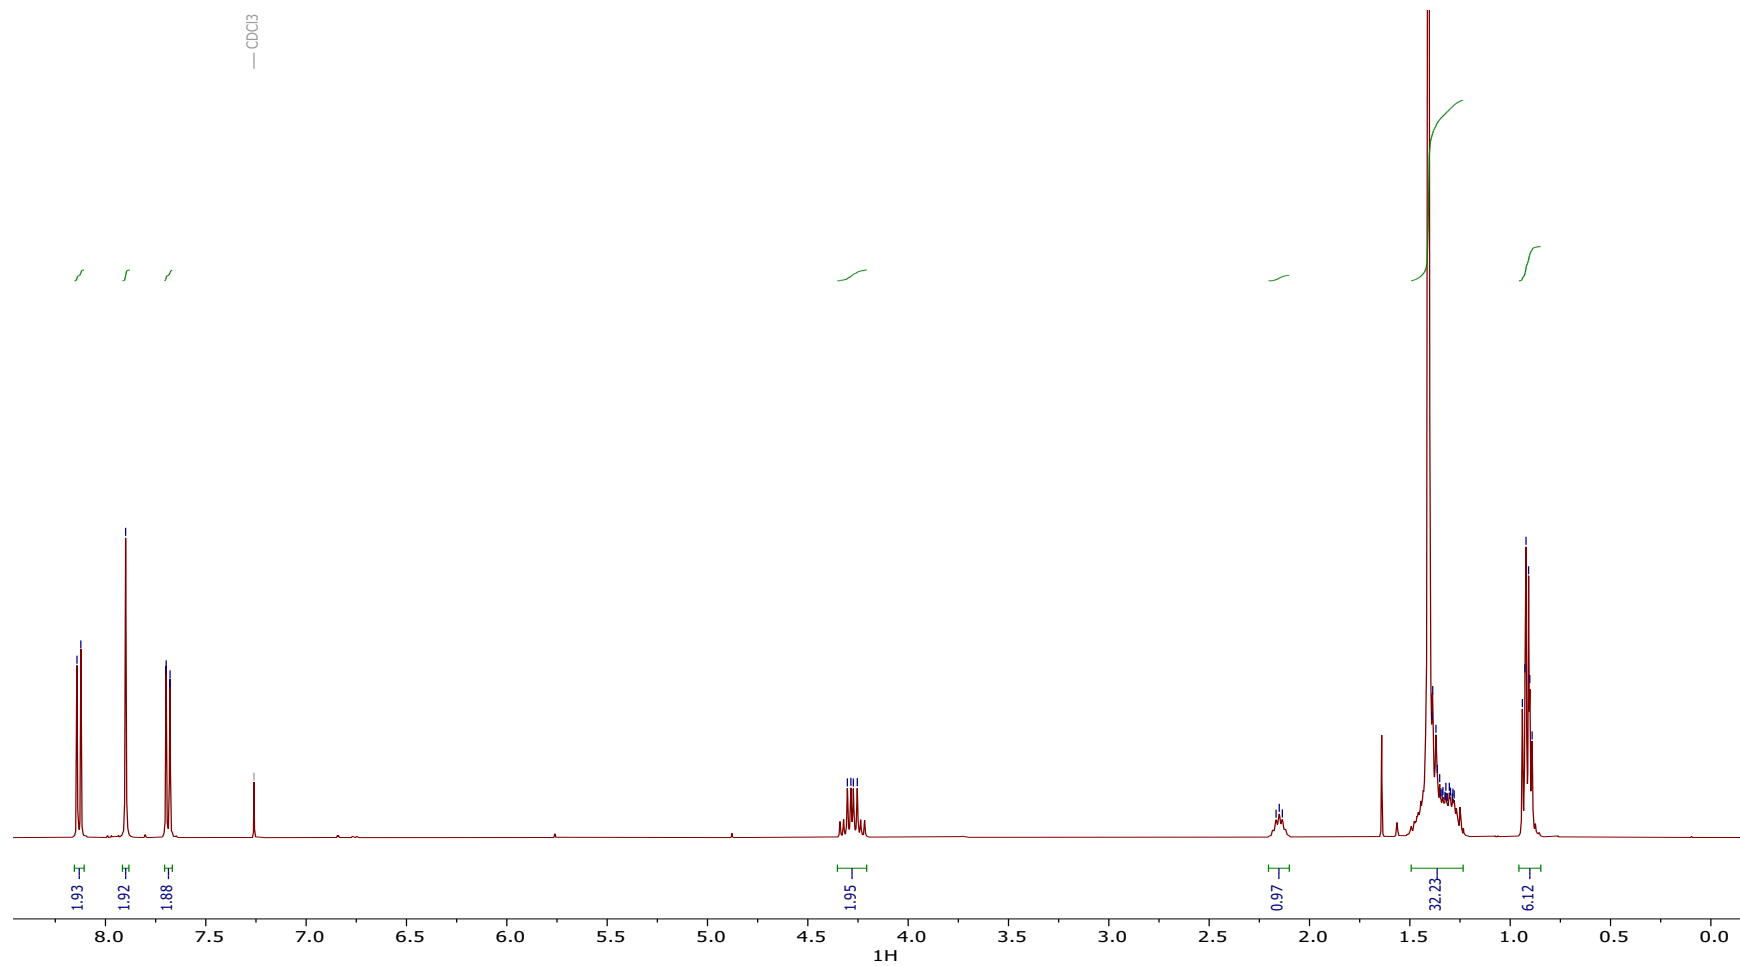

Figure S 3 1D  $^1\text{H}$  NMR spectrum of **1** in  $\text{CDCl}_3$

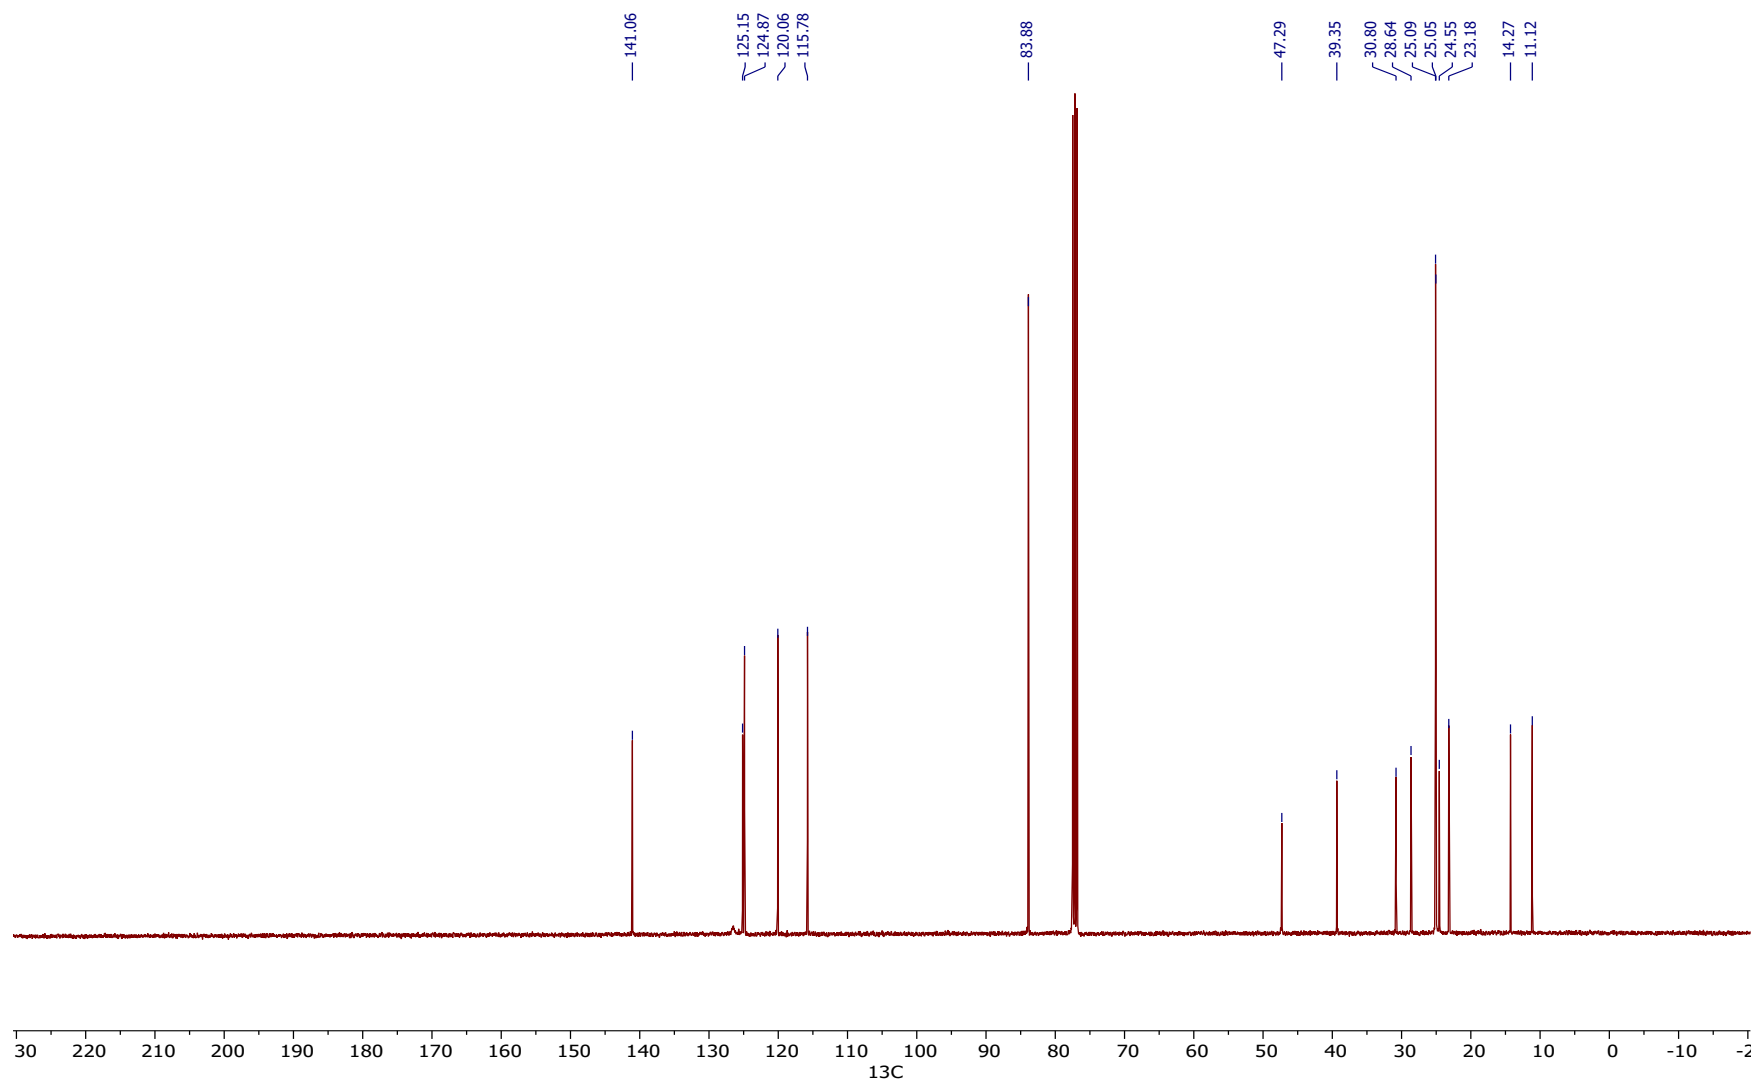

Figure S 4 1D  $^{13}\text{C}$  NMR spectrum of **1** in  $\text{CDCl}_3$

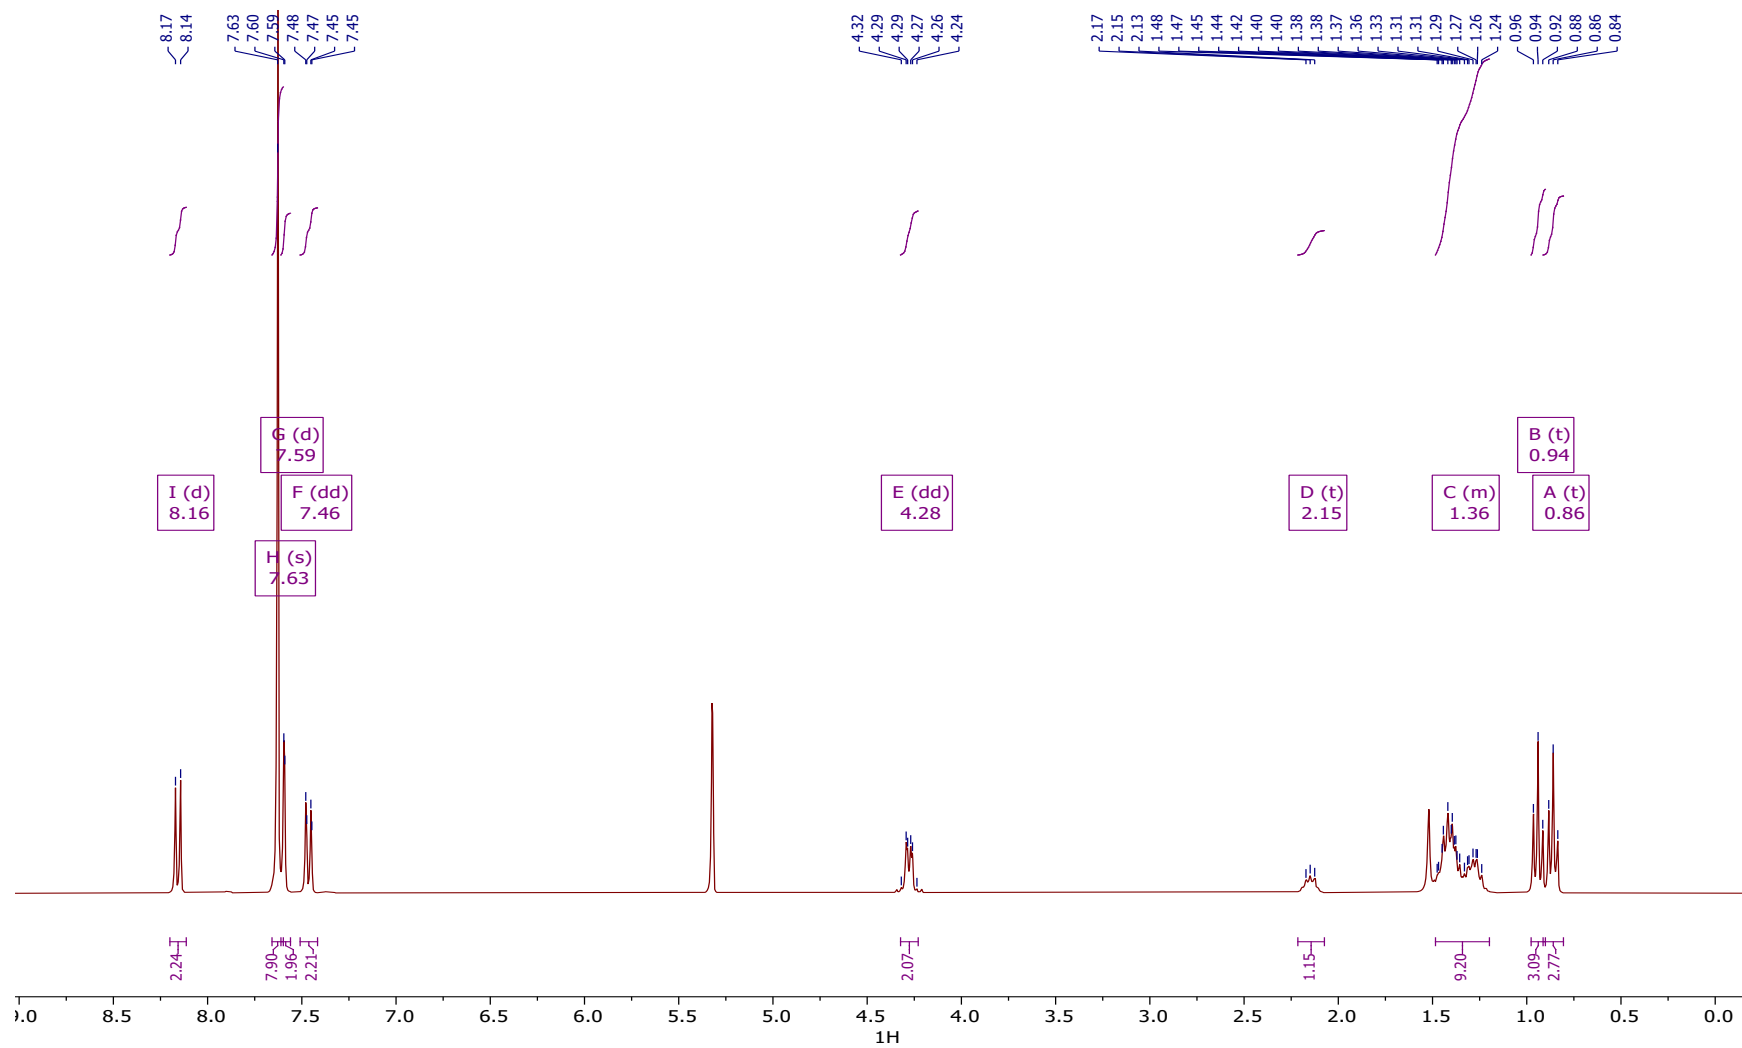

Figure S 5 1D  $^1\text{H}$  NMR spectrum of **2** in  $\text{CD}_2\text{Cl}_2$

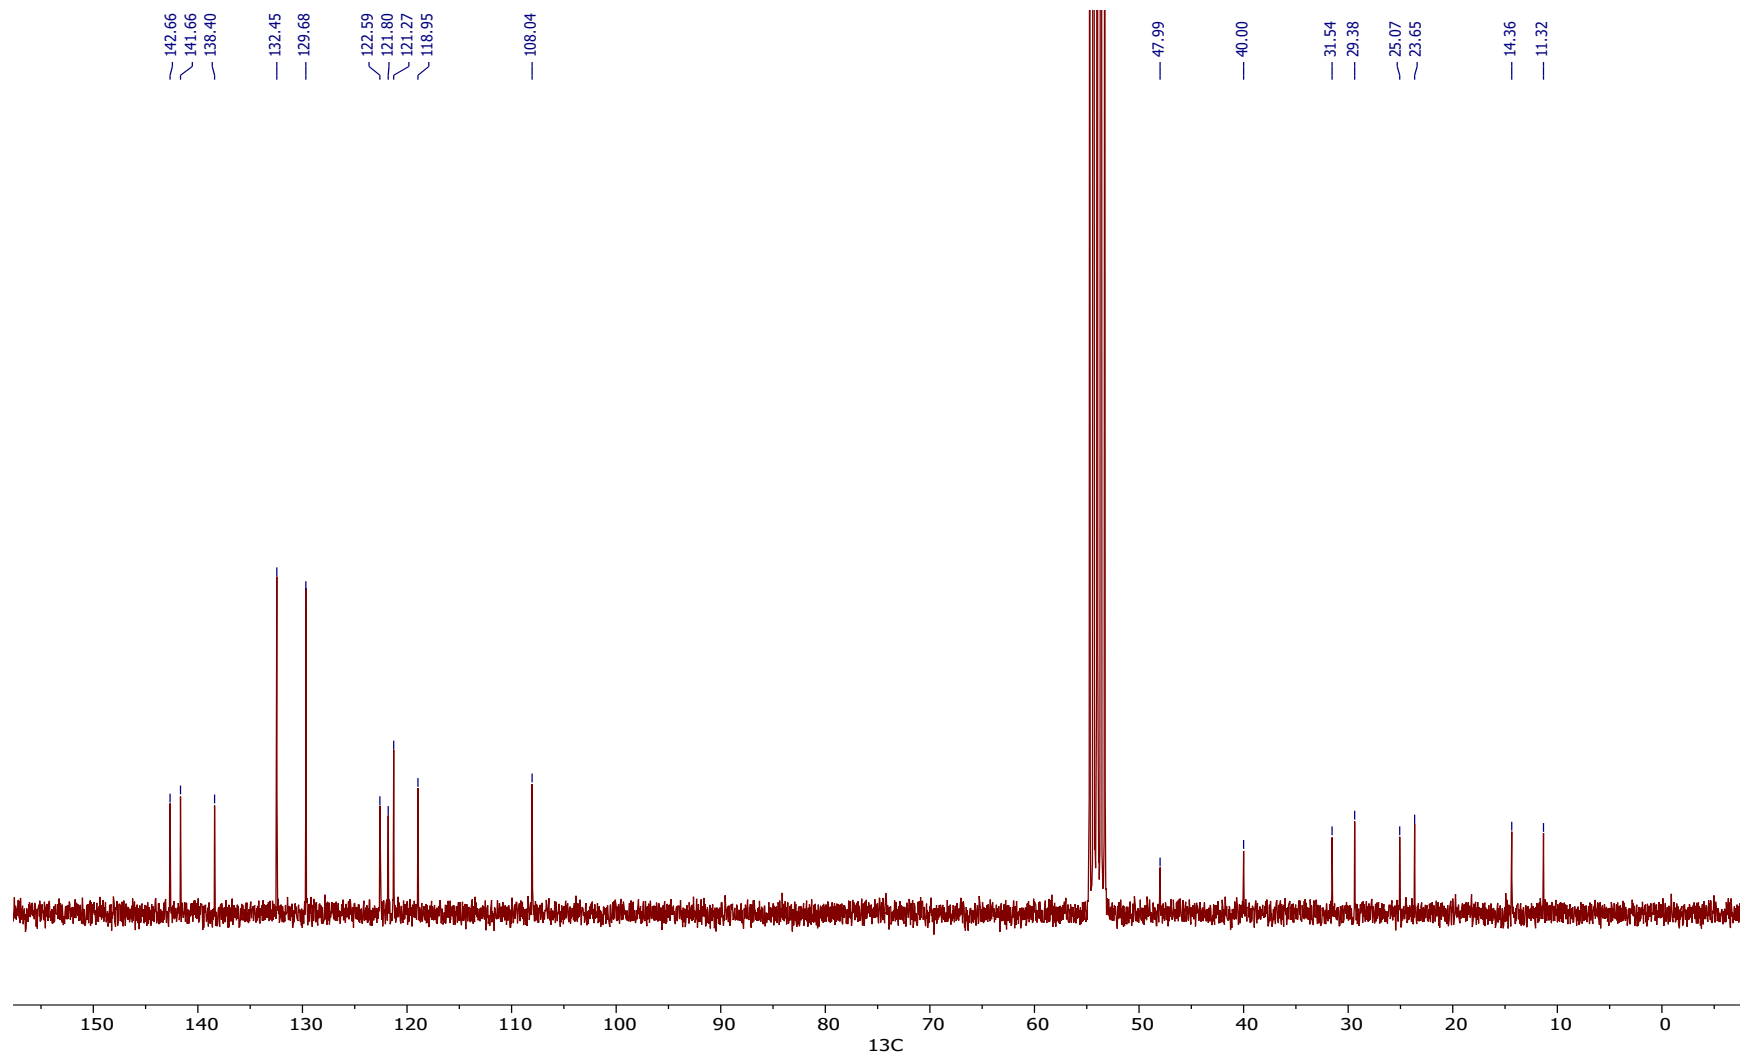

Figure S 6 1D <sup>13</sup>C NMR spectrum of **2** in CD<sub>2</sub>Cl<sub>2</sub>

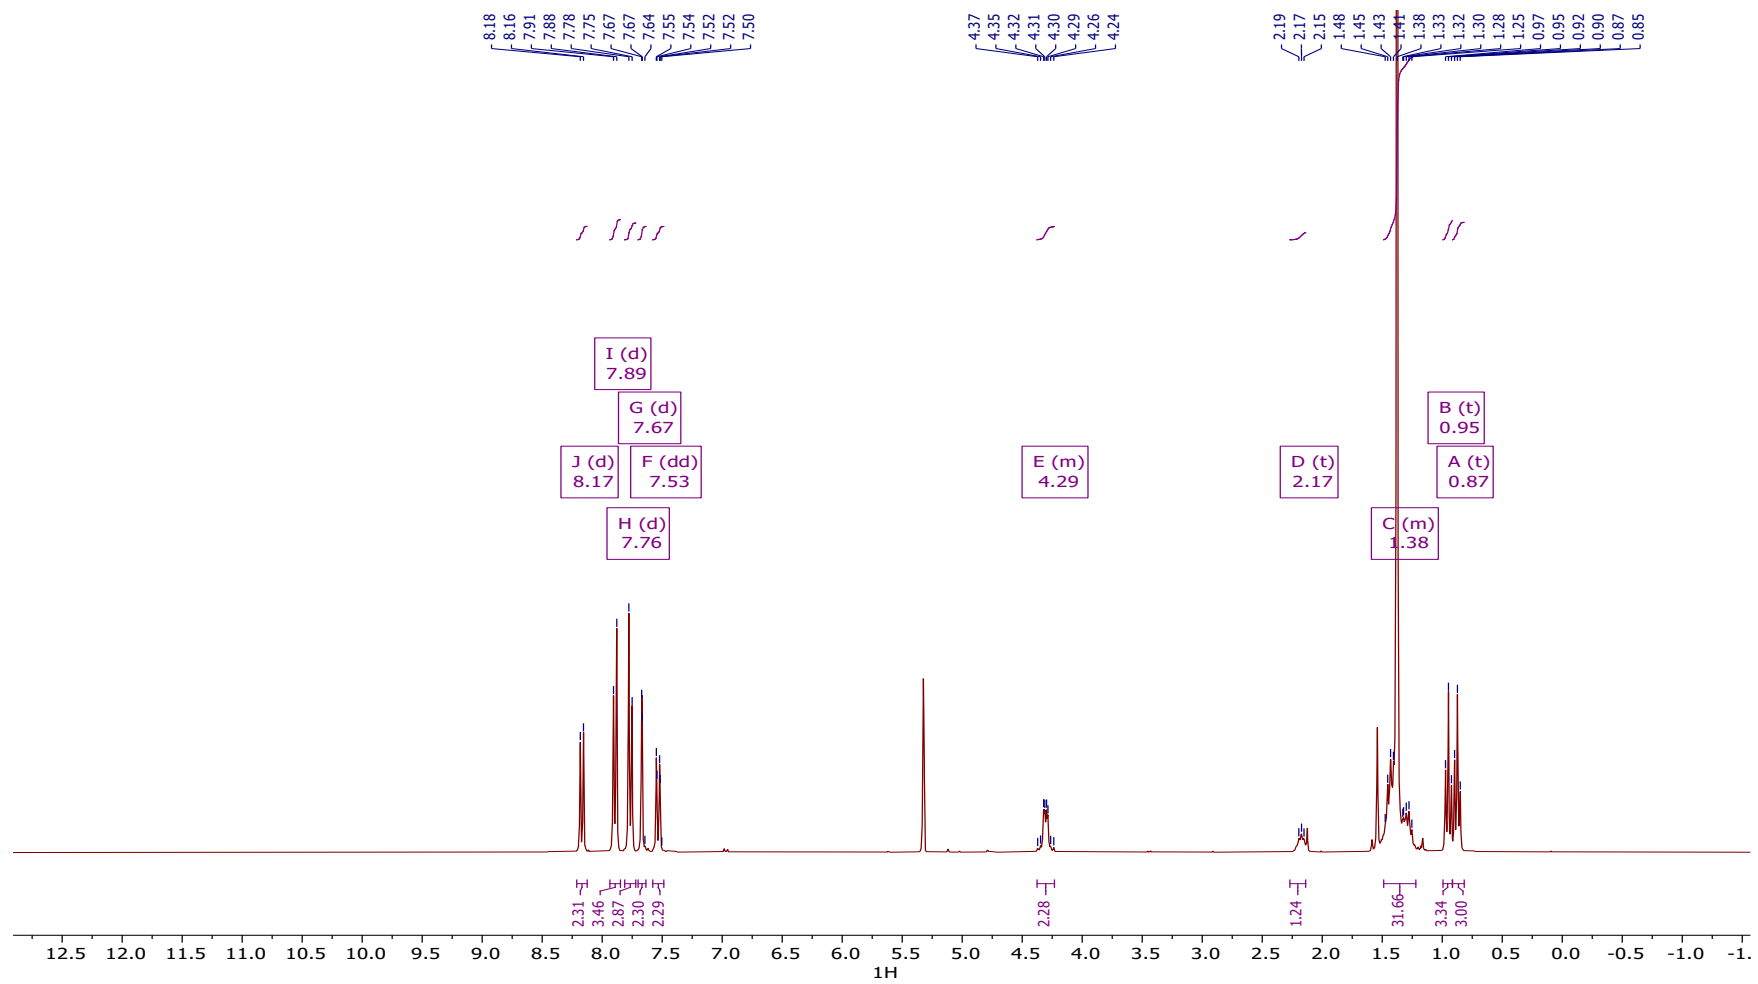

Figure S 7 1D  $^1\text{H}$  NMR spectrum of **3** in  $\text{CD}_2\text{Cl}_2$

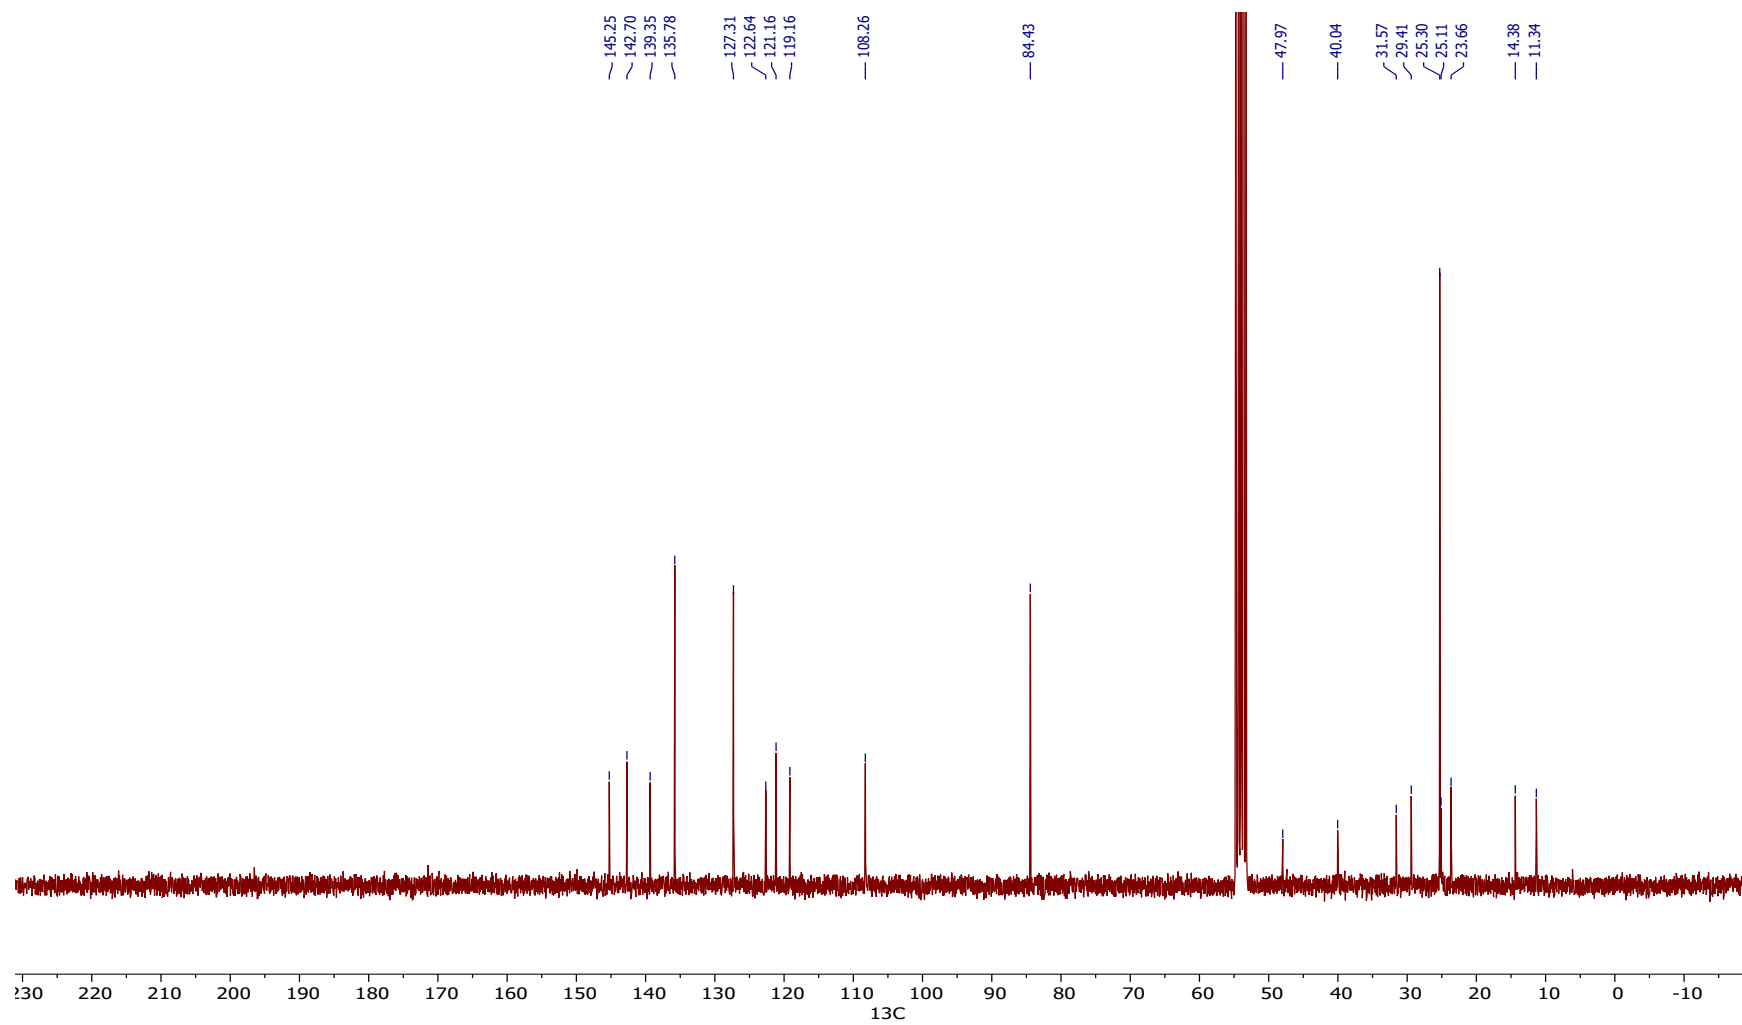

Figure S 8 1D  $^{13}\text{C}$  NMR spectrum of **3** in  $\text{CD}_2\text{Cl}_2$

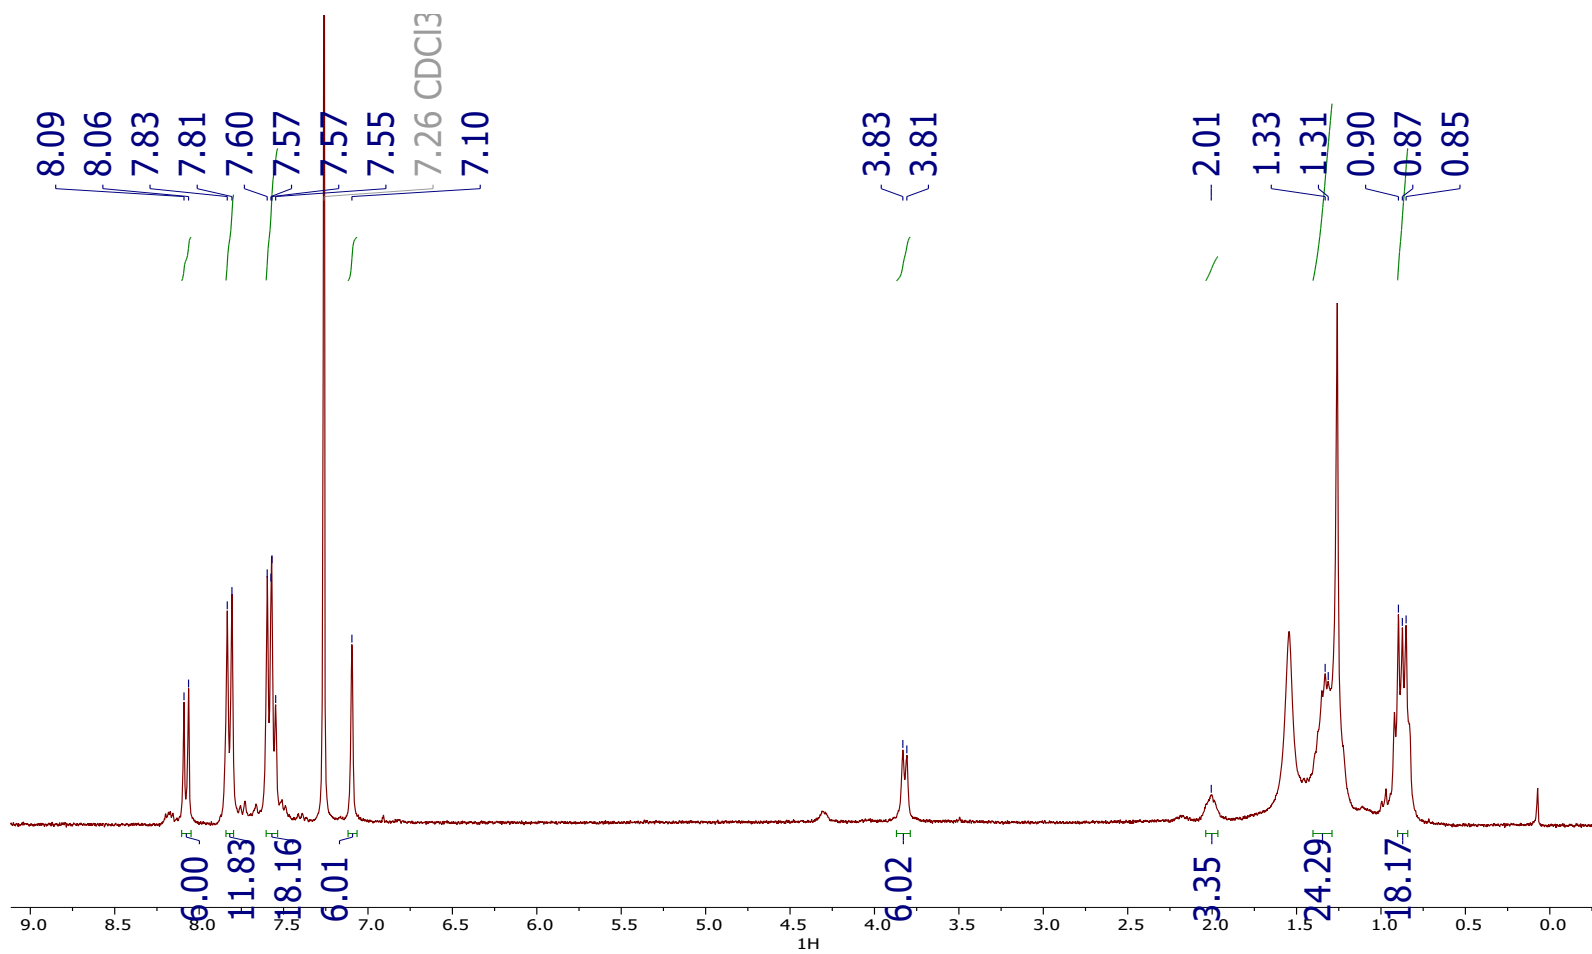

Figure S 9 1D <sup>1</sup>H NMR spectrum of [12]CPP3N in CDCl<sub>3</sub>



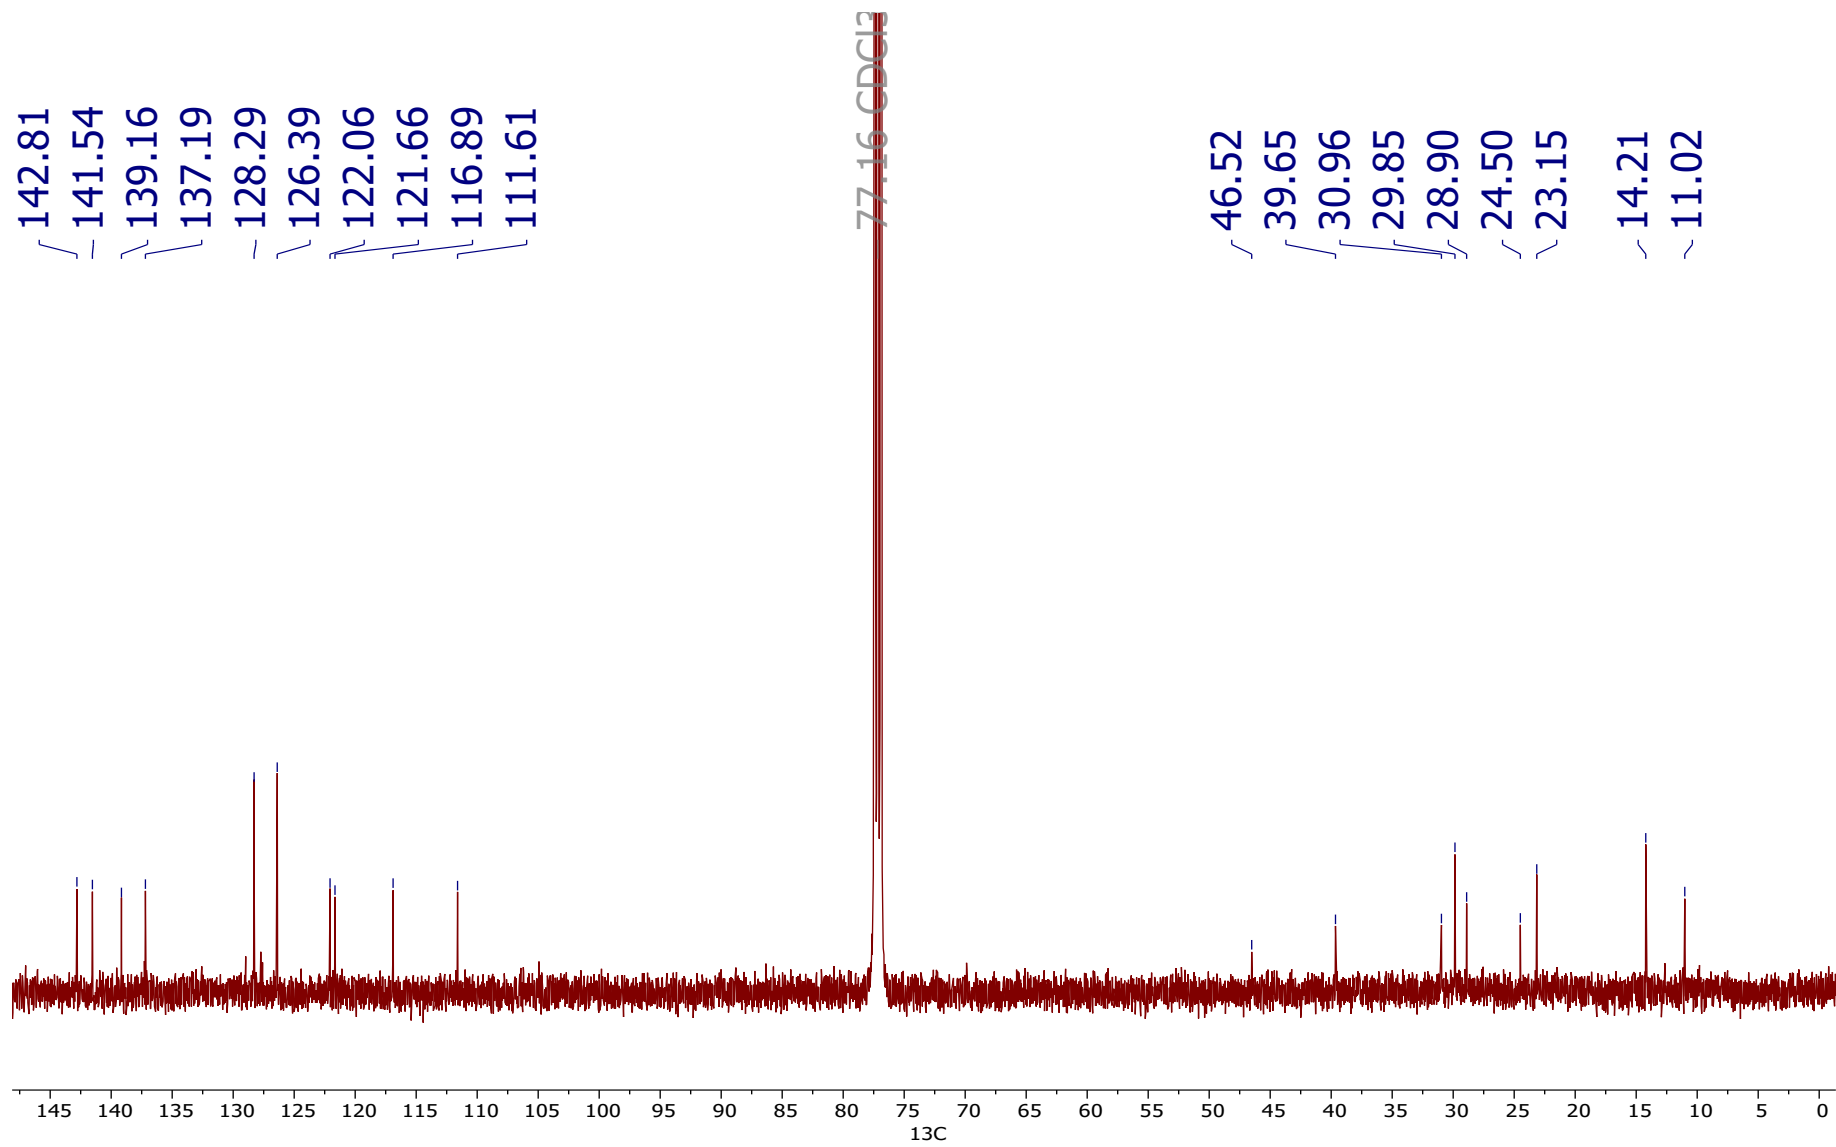

Figure S 10 1D <sup>13</sup>C NMR spectrum of [12]CPP3N in CDCl<sub>3</sub>

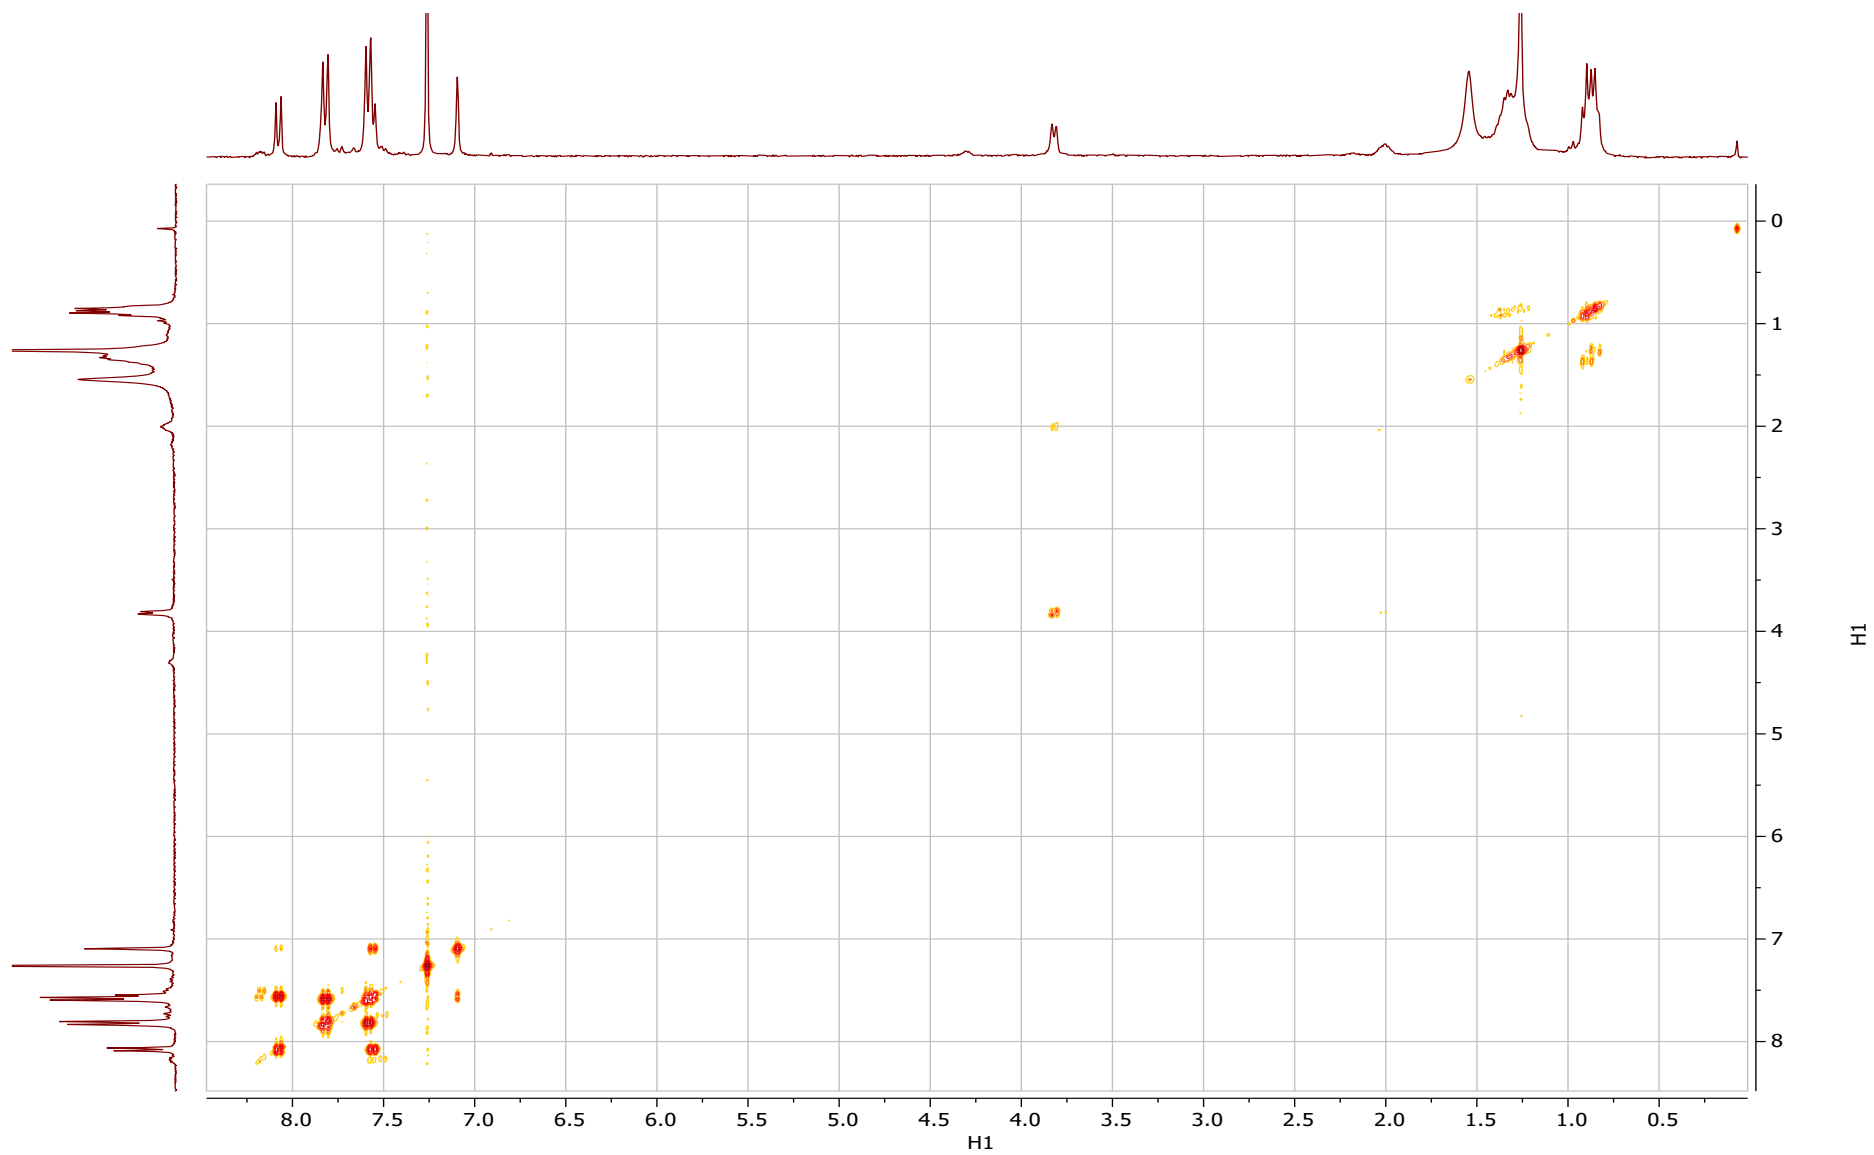

Figure S 11 2D-COSY NMR spectrum of [12]CPP3N in CDCl<sub>3</sub>

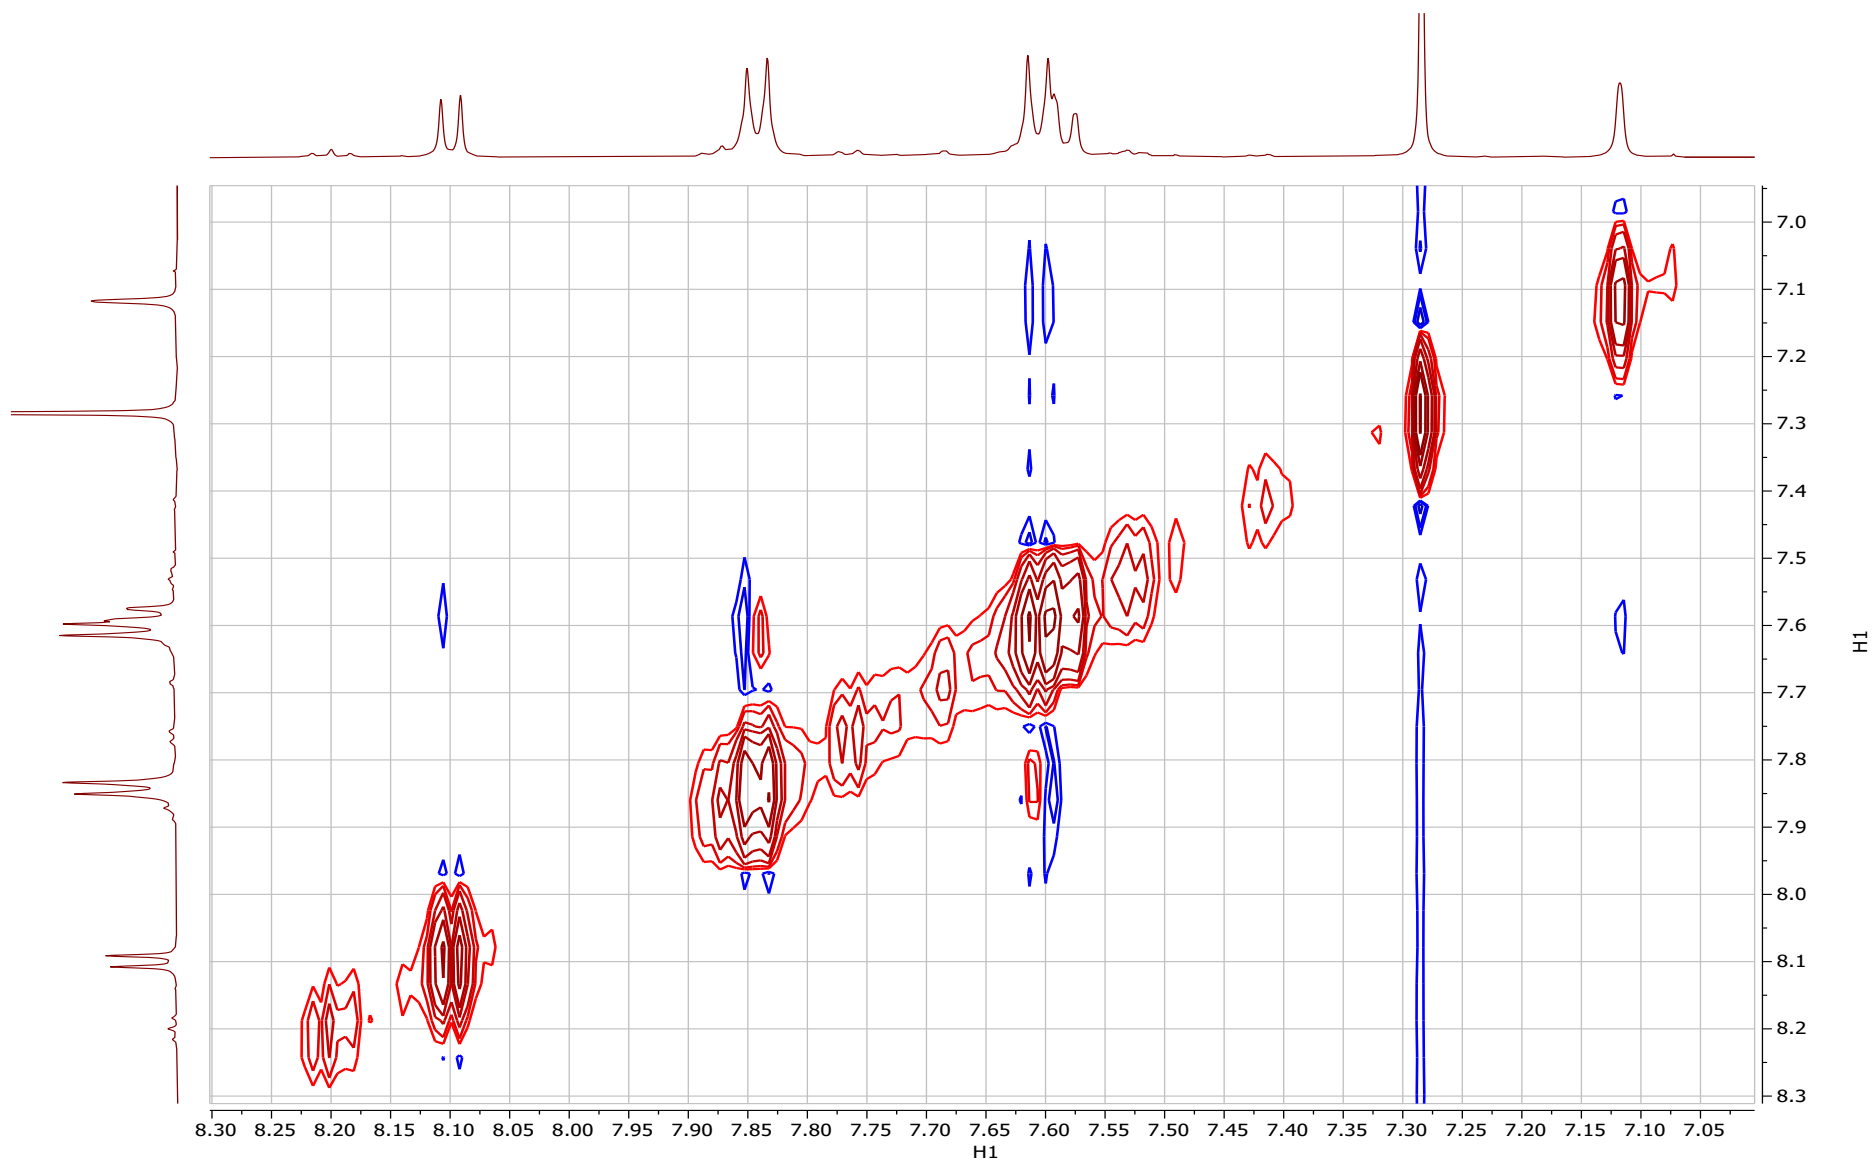

Figure S 12 2D-NOESY NMR spectrum of [12]CPP3N in  $CDCl_3$

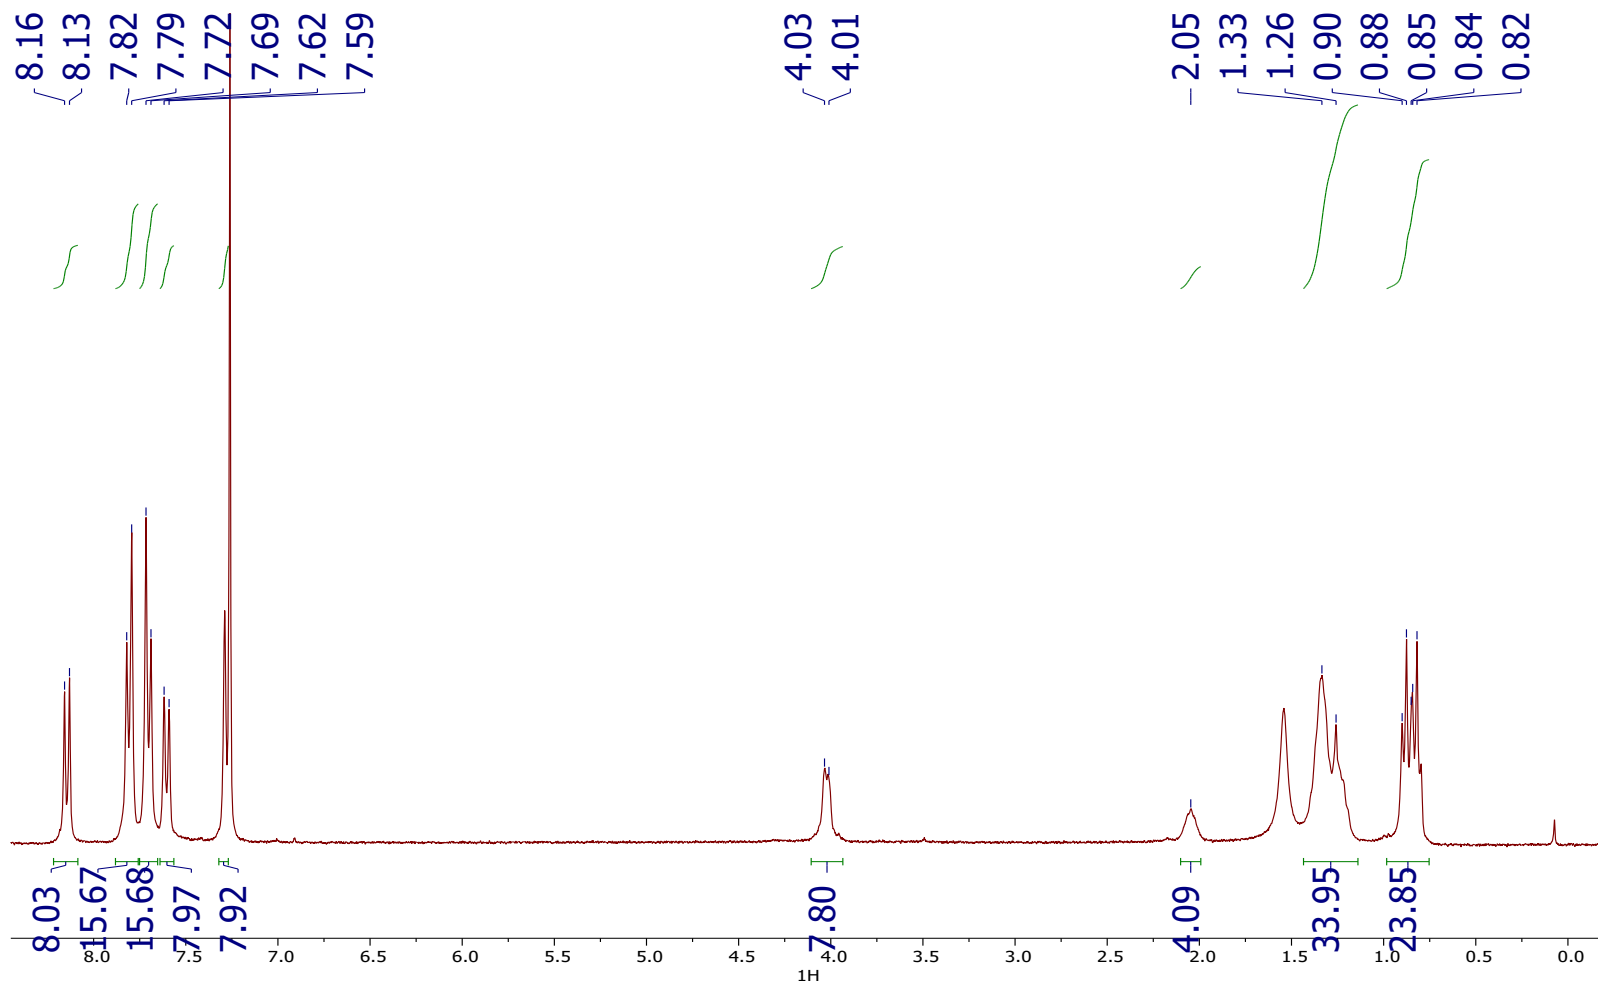

Figure S 13 1D  $^1\text{H}$  NMR spectrum of [16]CPP4N in  $\text{CDCl}_3$

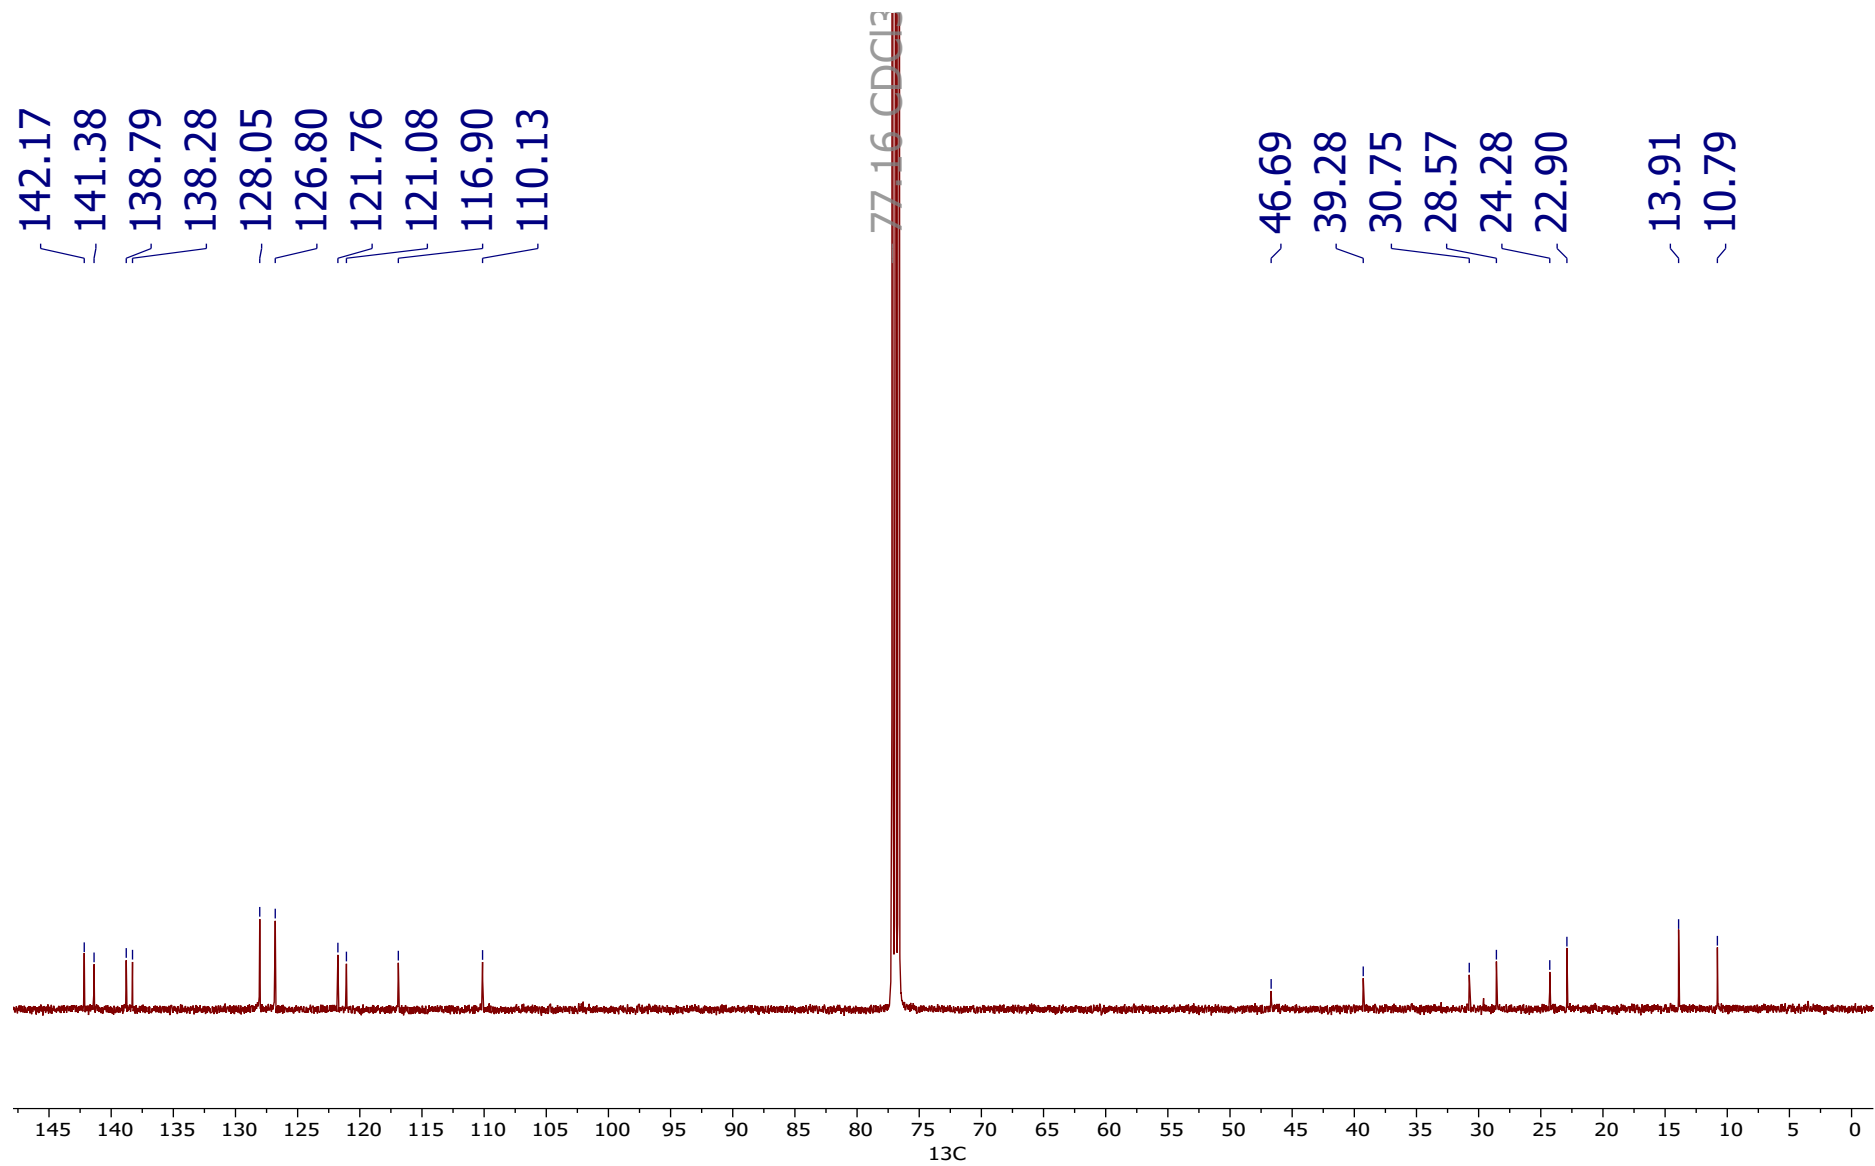

Figure S 14 1D <sup>13</sup>C NMR spectrum of [16]CPP4N in CDCl<sub>3</sub>

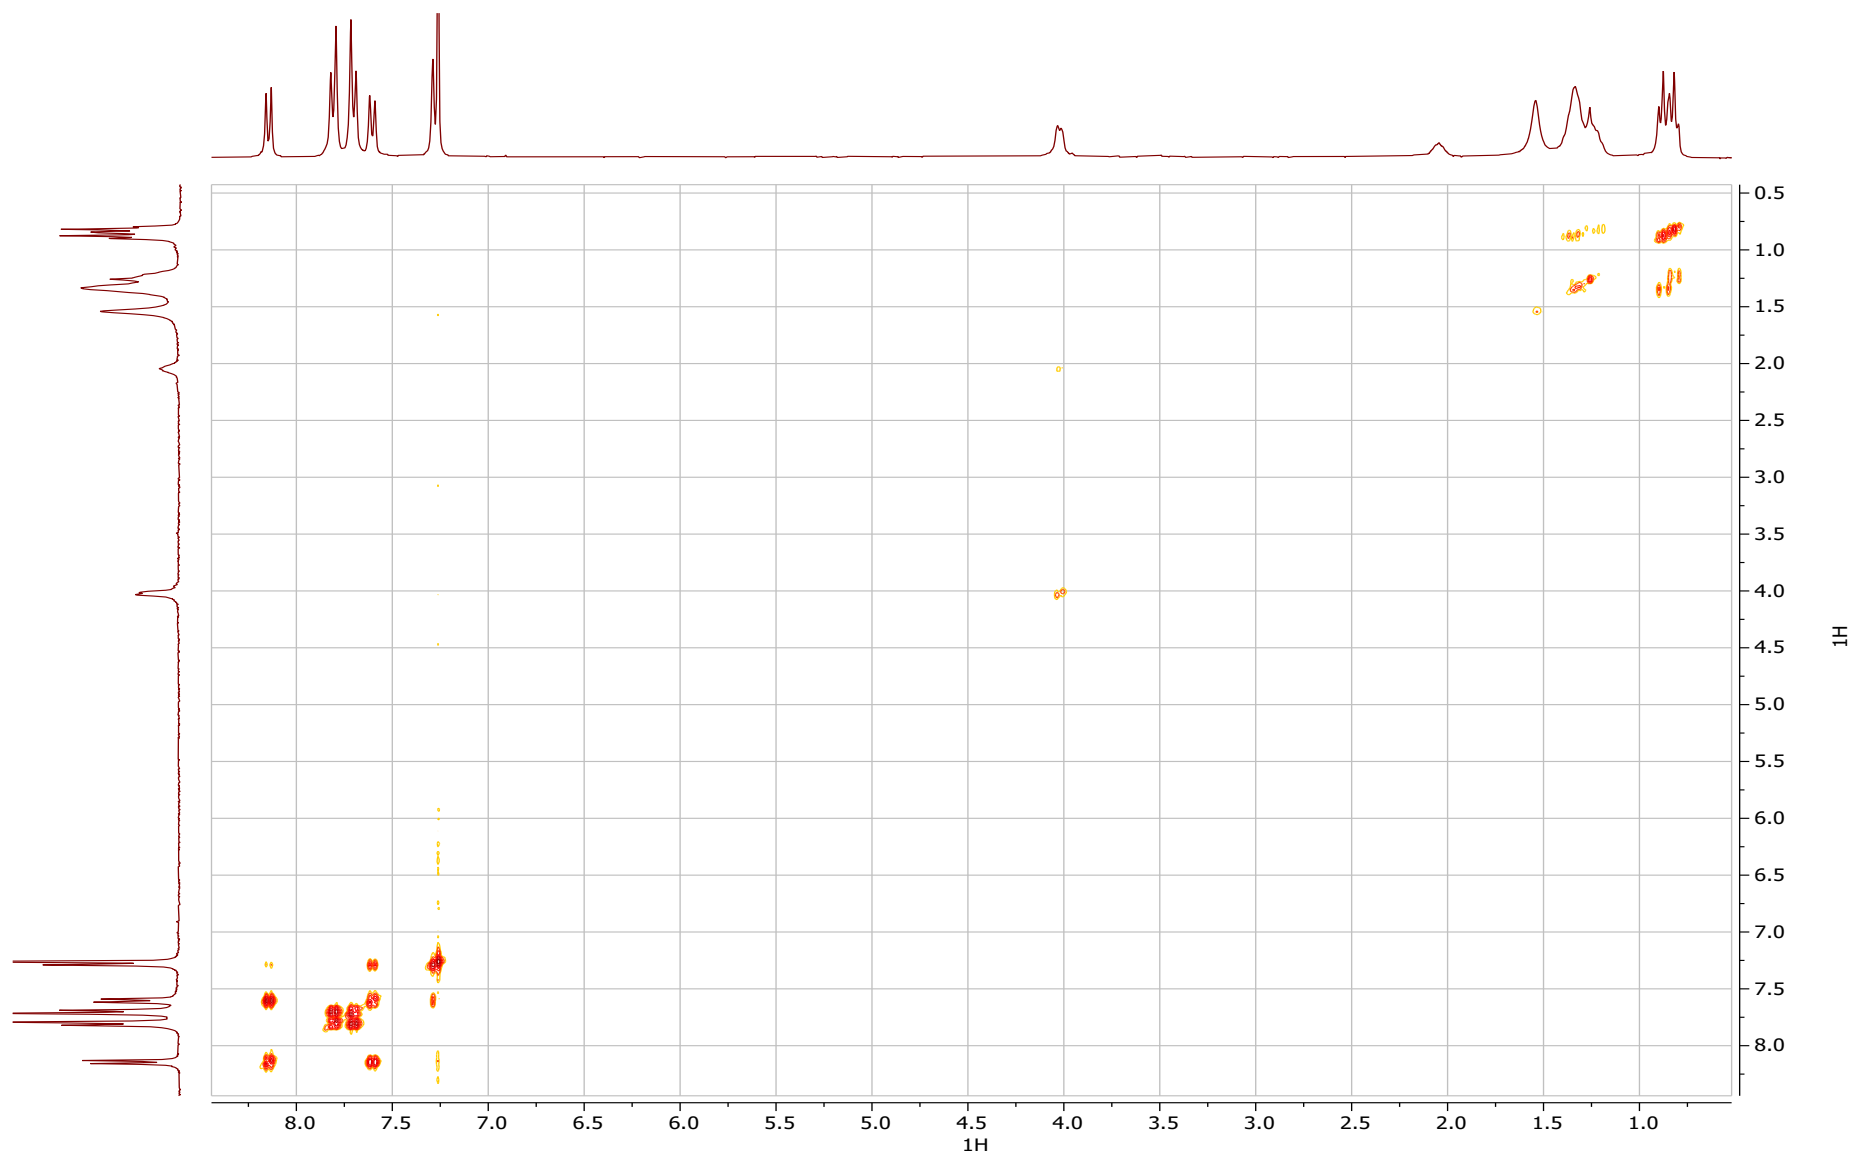

Figure S 15 2D-COSY NMR spectrum of [16]CPP4N in CDCl<sub>3</sub>

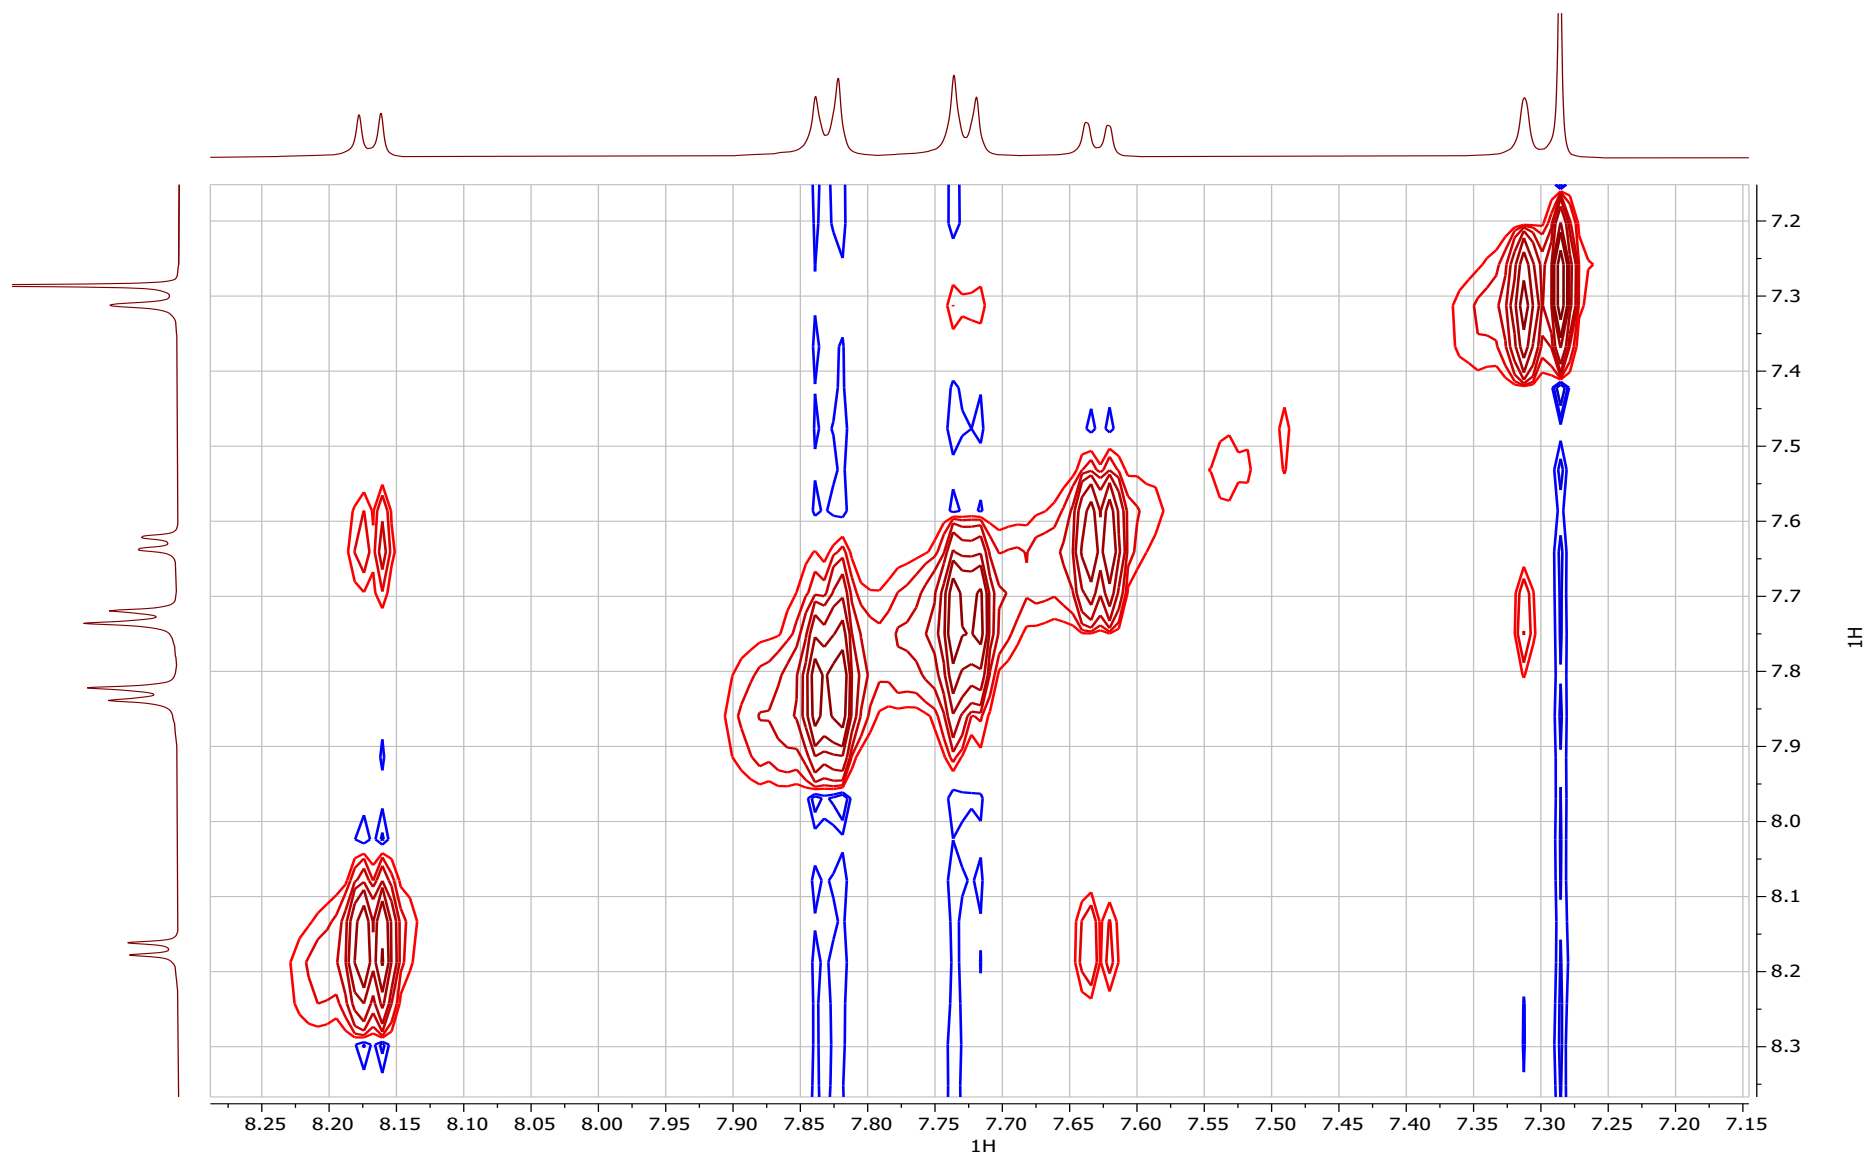

Figure S 16 2D-NOESY NMR spectrum of [16]CPP4N in CDCl<sub>3</sub>

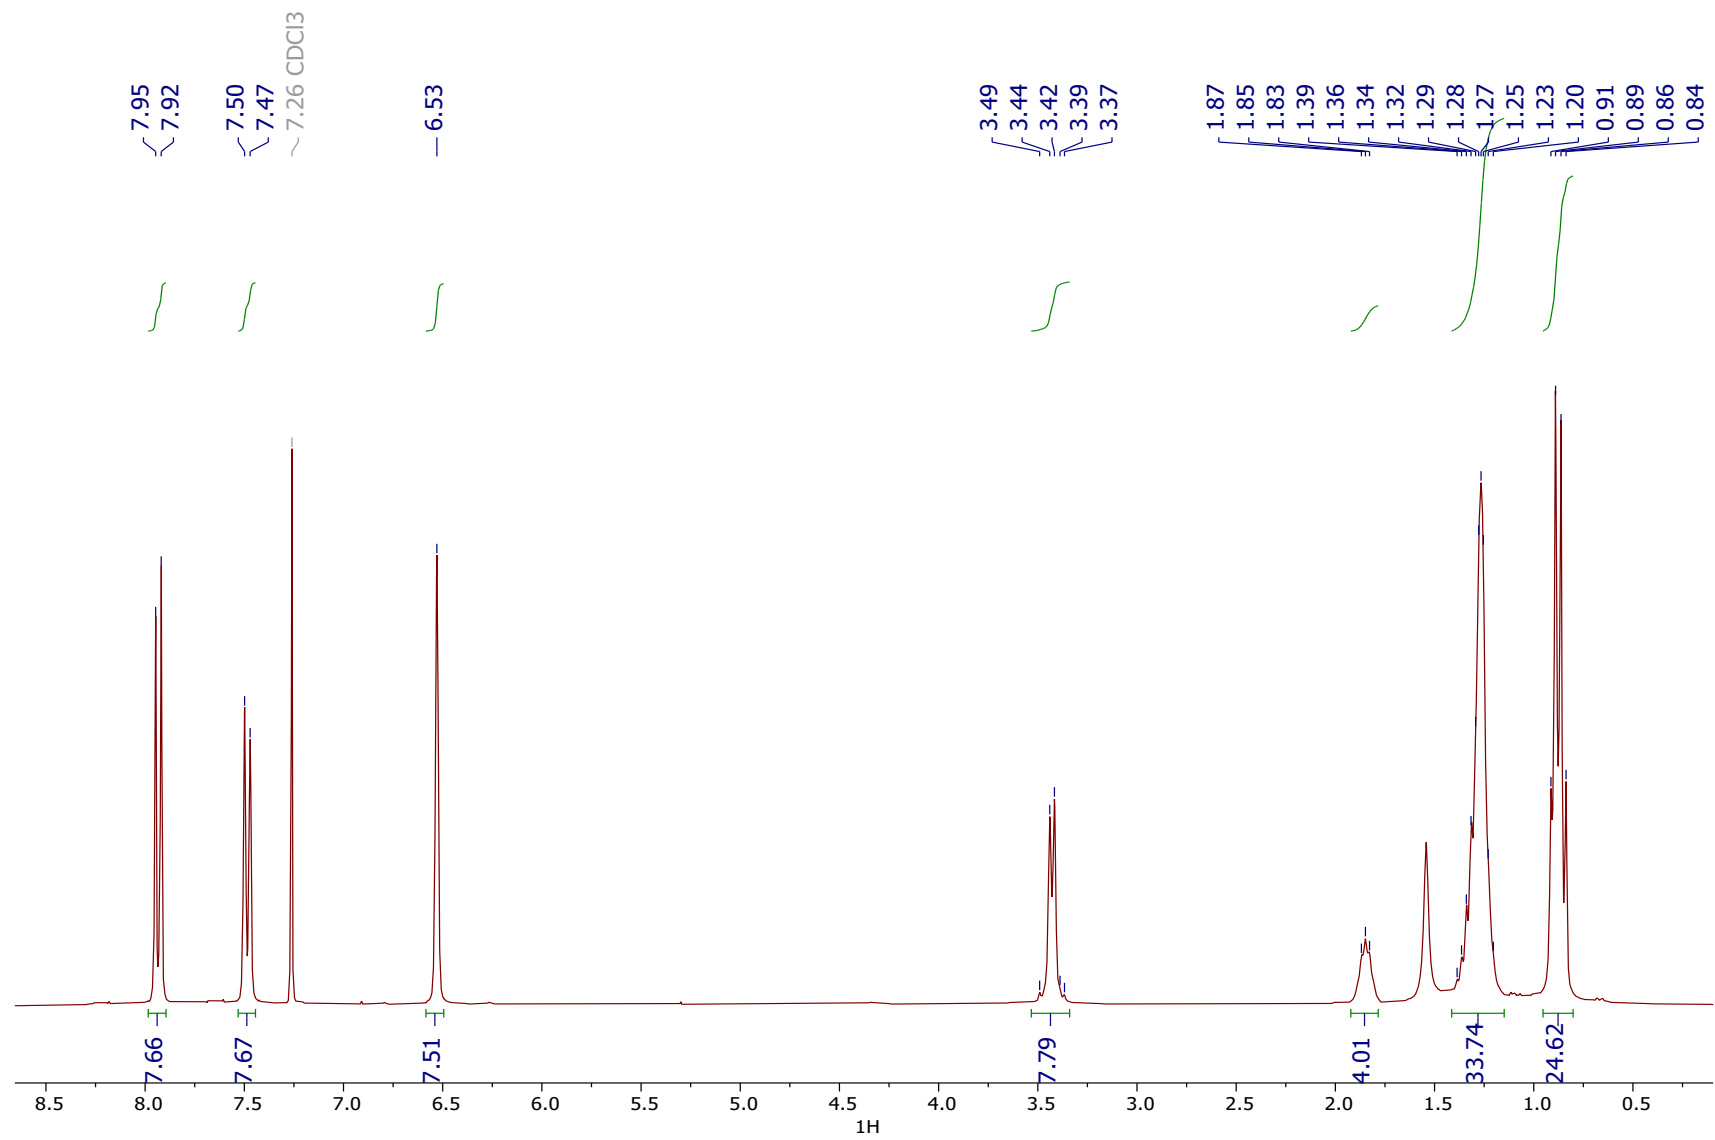

Figure S 17 1D <sup>1</sup>H NMR spectrum of [8]CPP4N in CDCl<sub>3</sub>



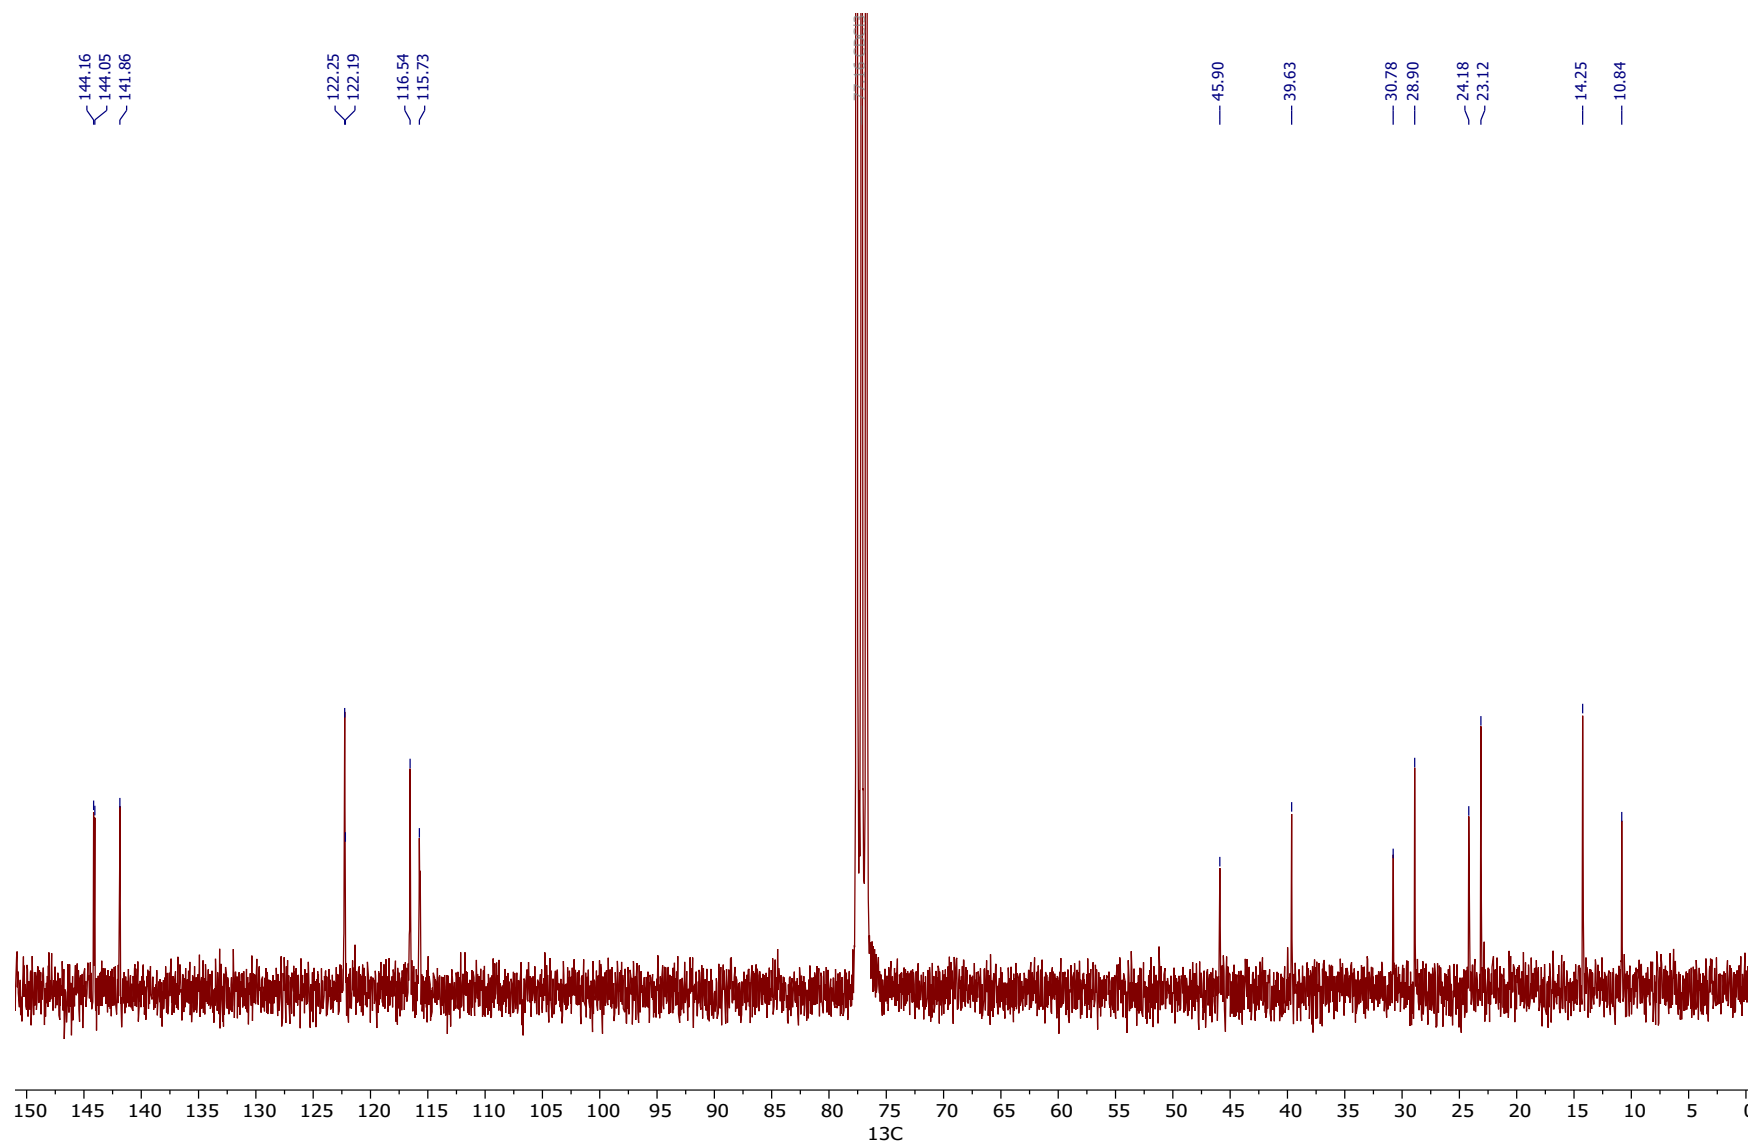

Figure S 18 1D  $^{13}\text{C}$  NMR spectrum of [8]CPP4N in  $\text{CDCl}_3$

# 4 IR

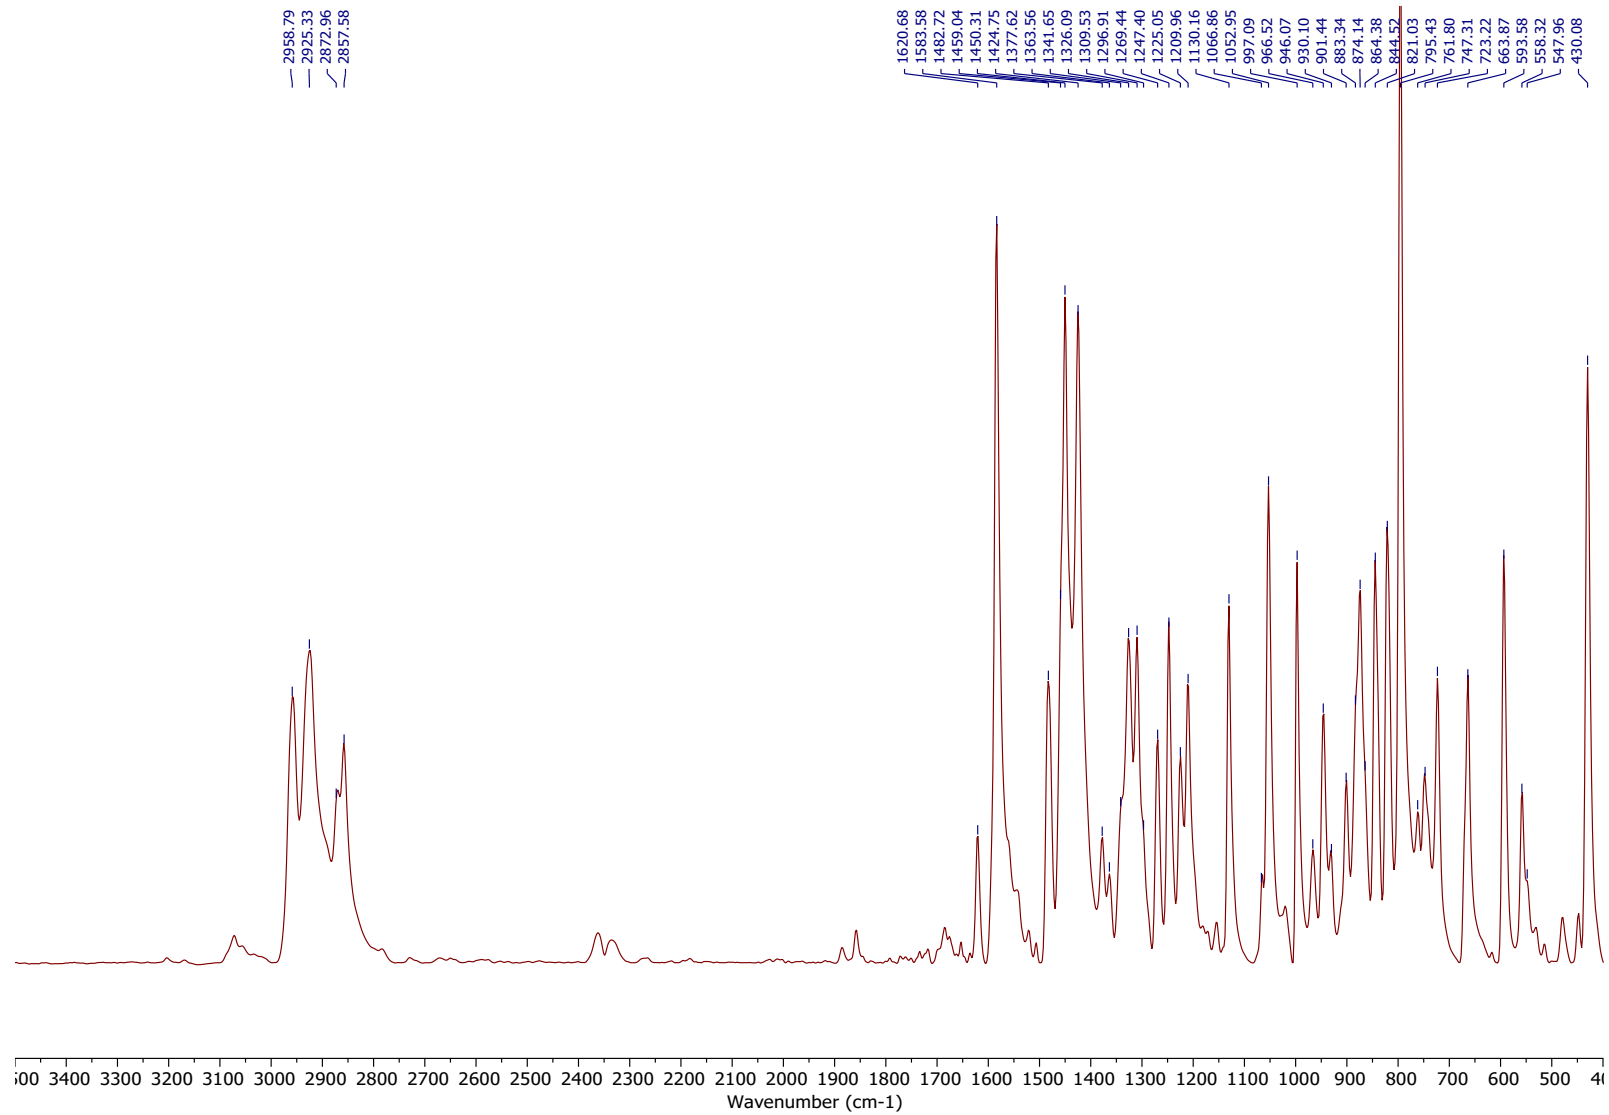

Figure S 19 IR spectrum of 2,7-dibromo-N-(2-ethylhexyl)-carbazole

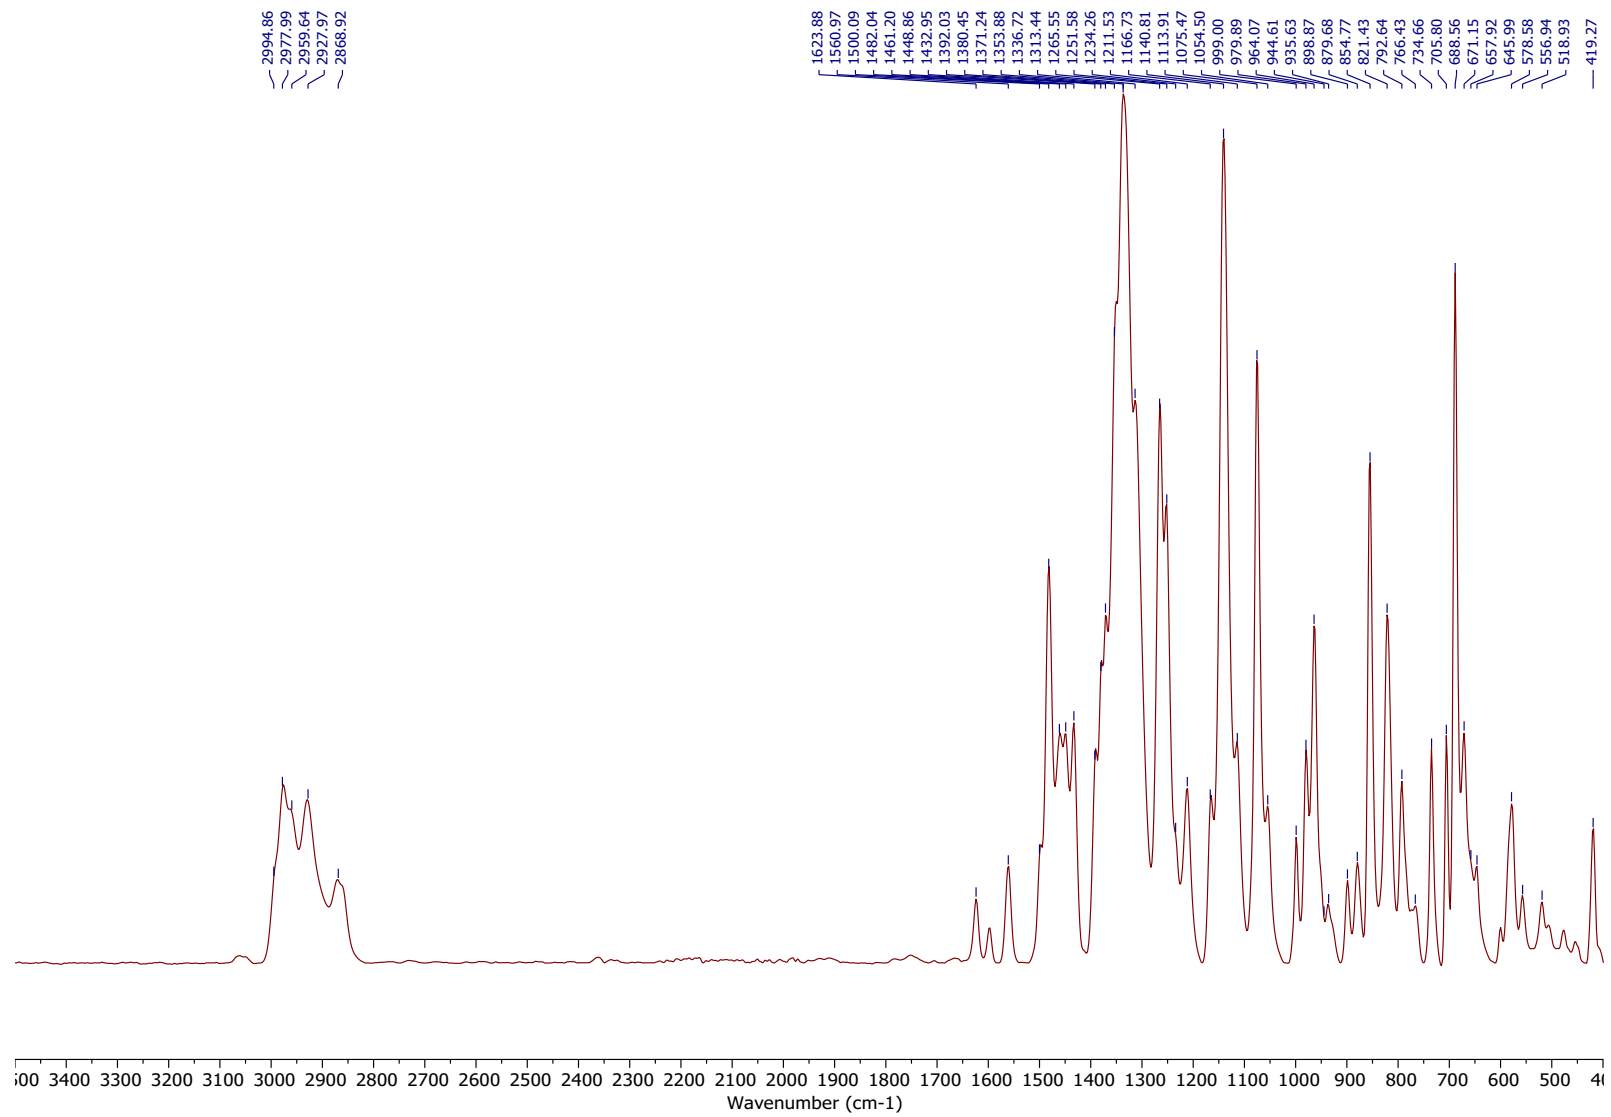

Figure S 20 IR spectrum of **1**

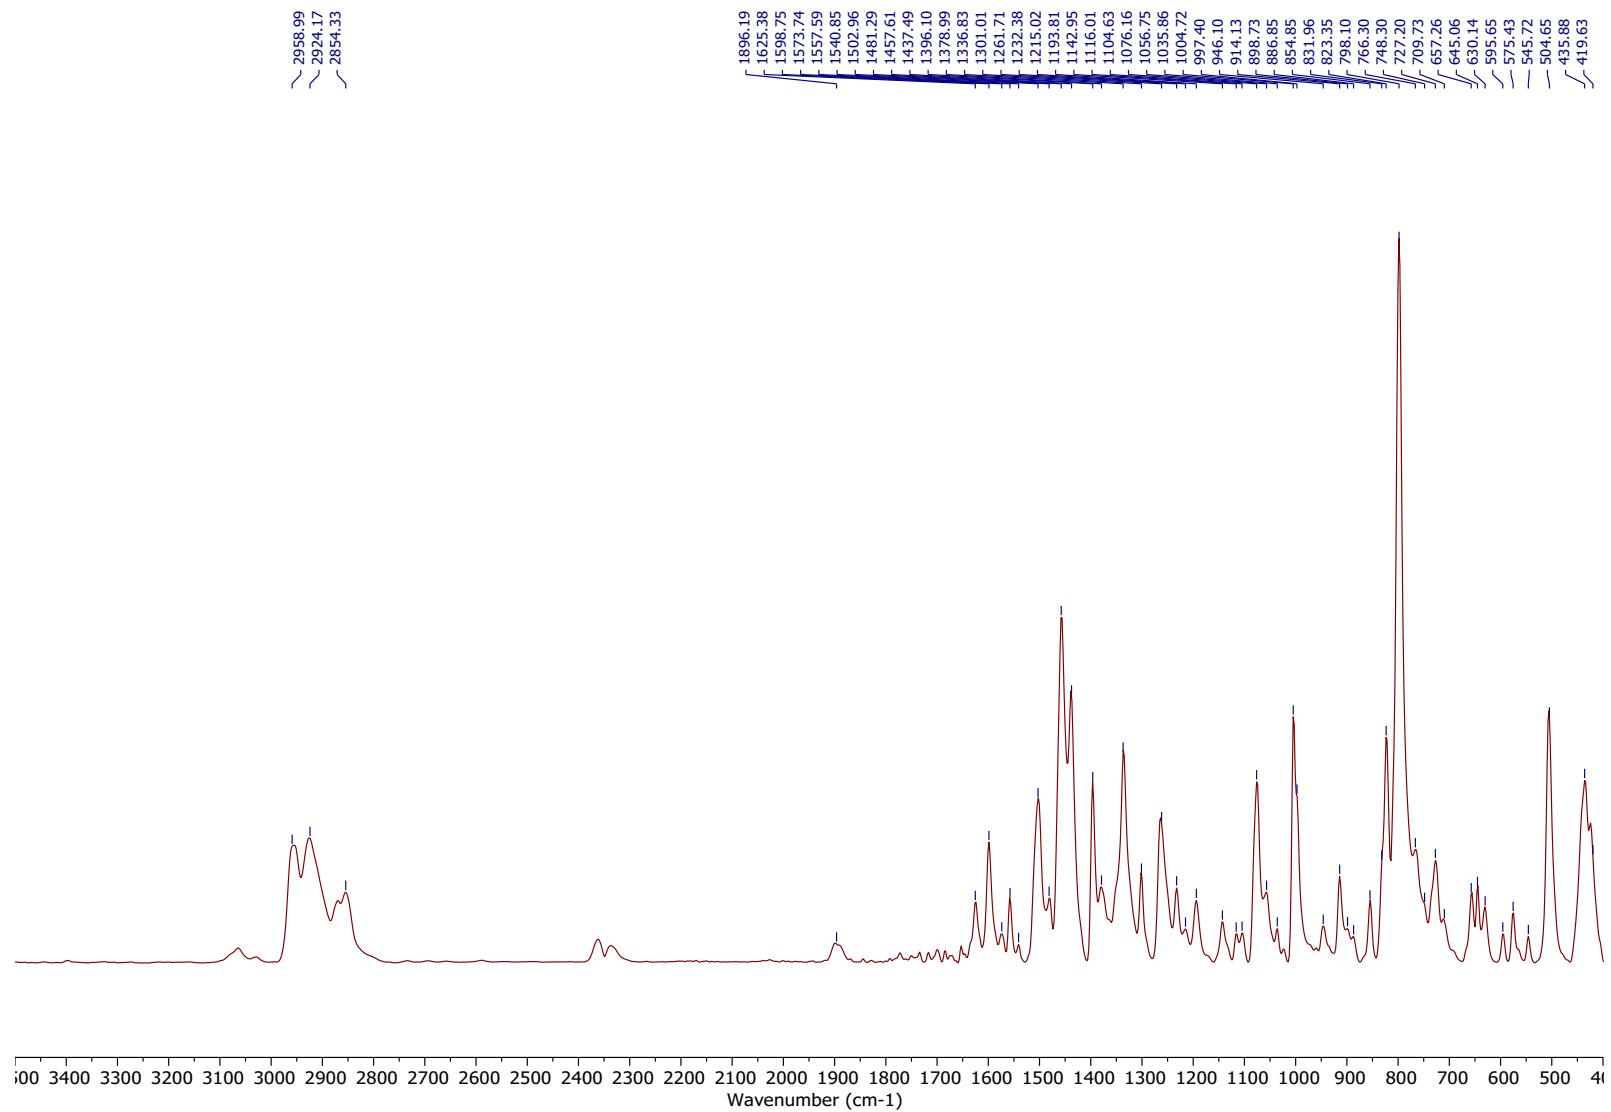

Figure S 21 IR spectrum of 2

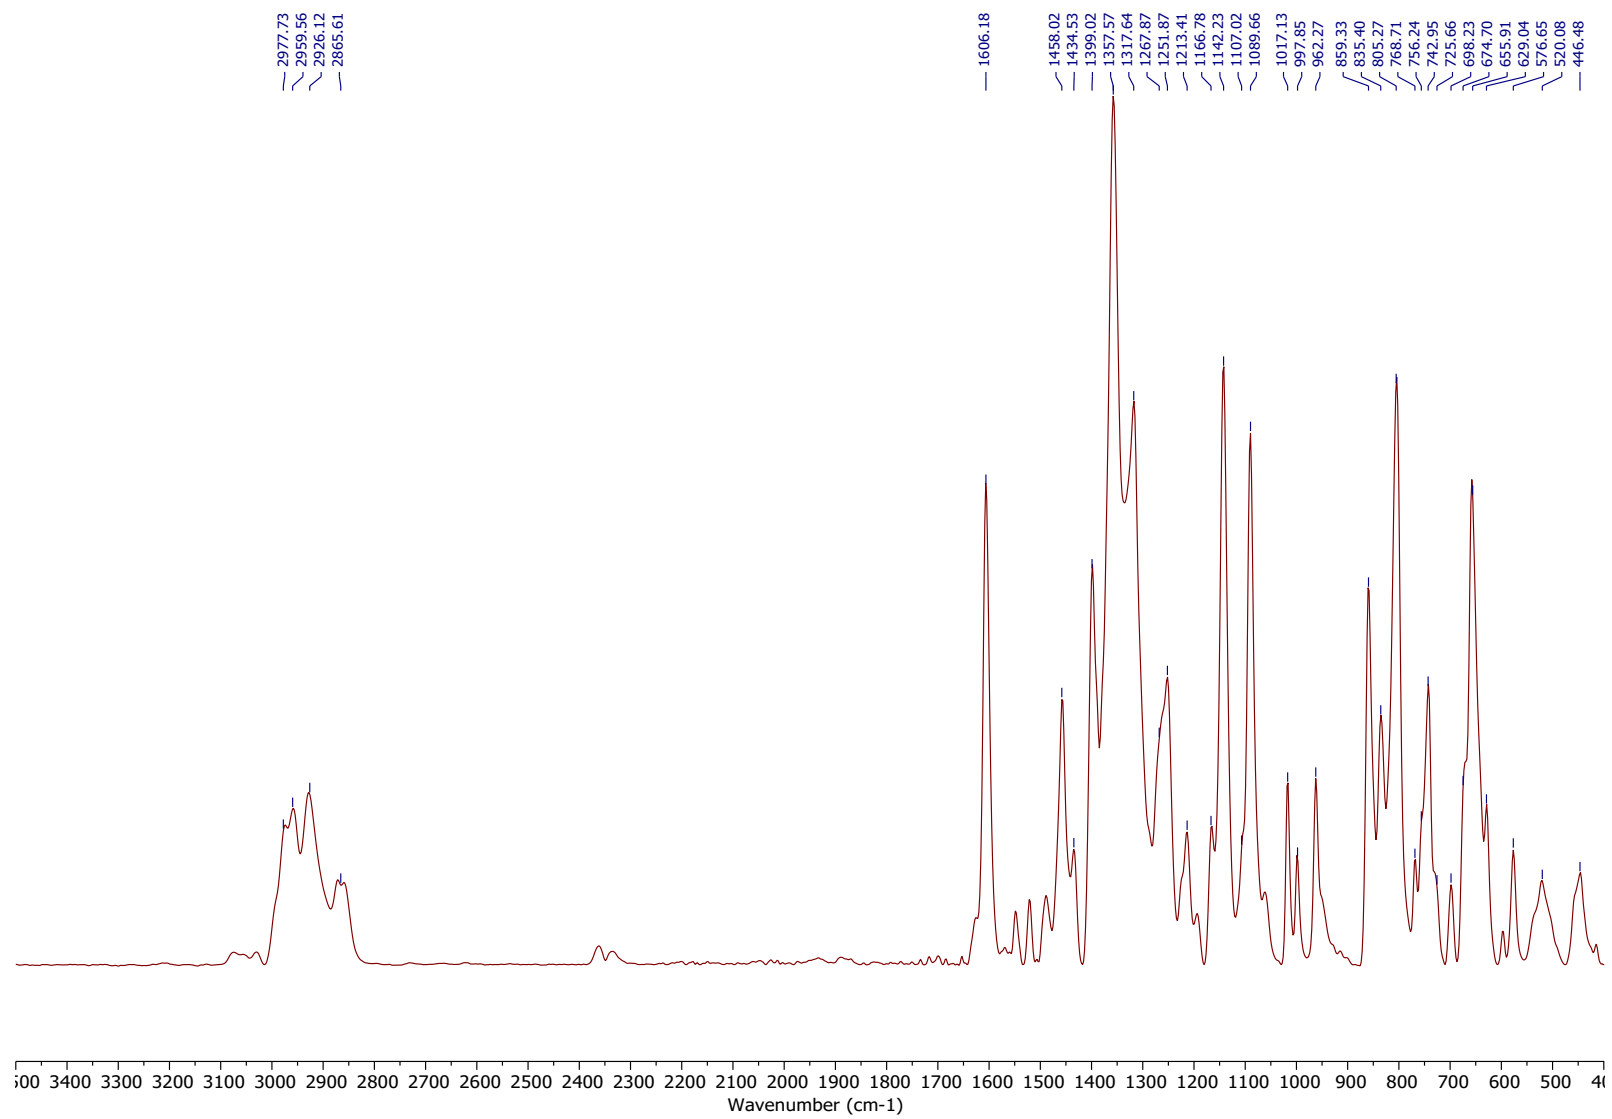

Figure S 22 IR spectrum of 3

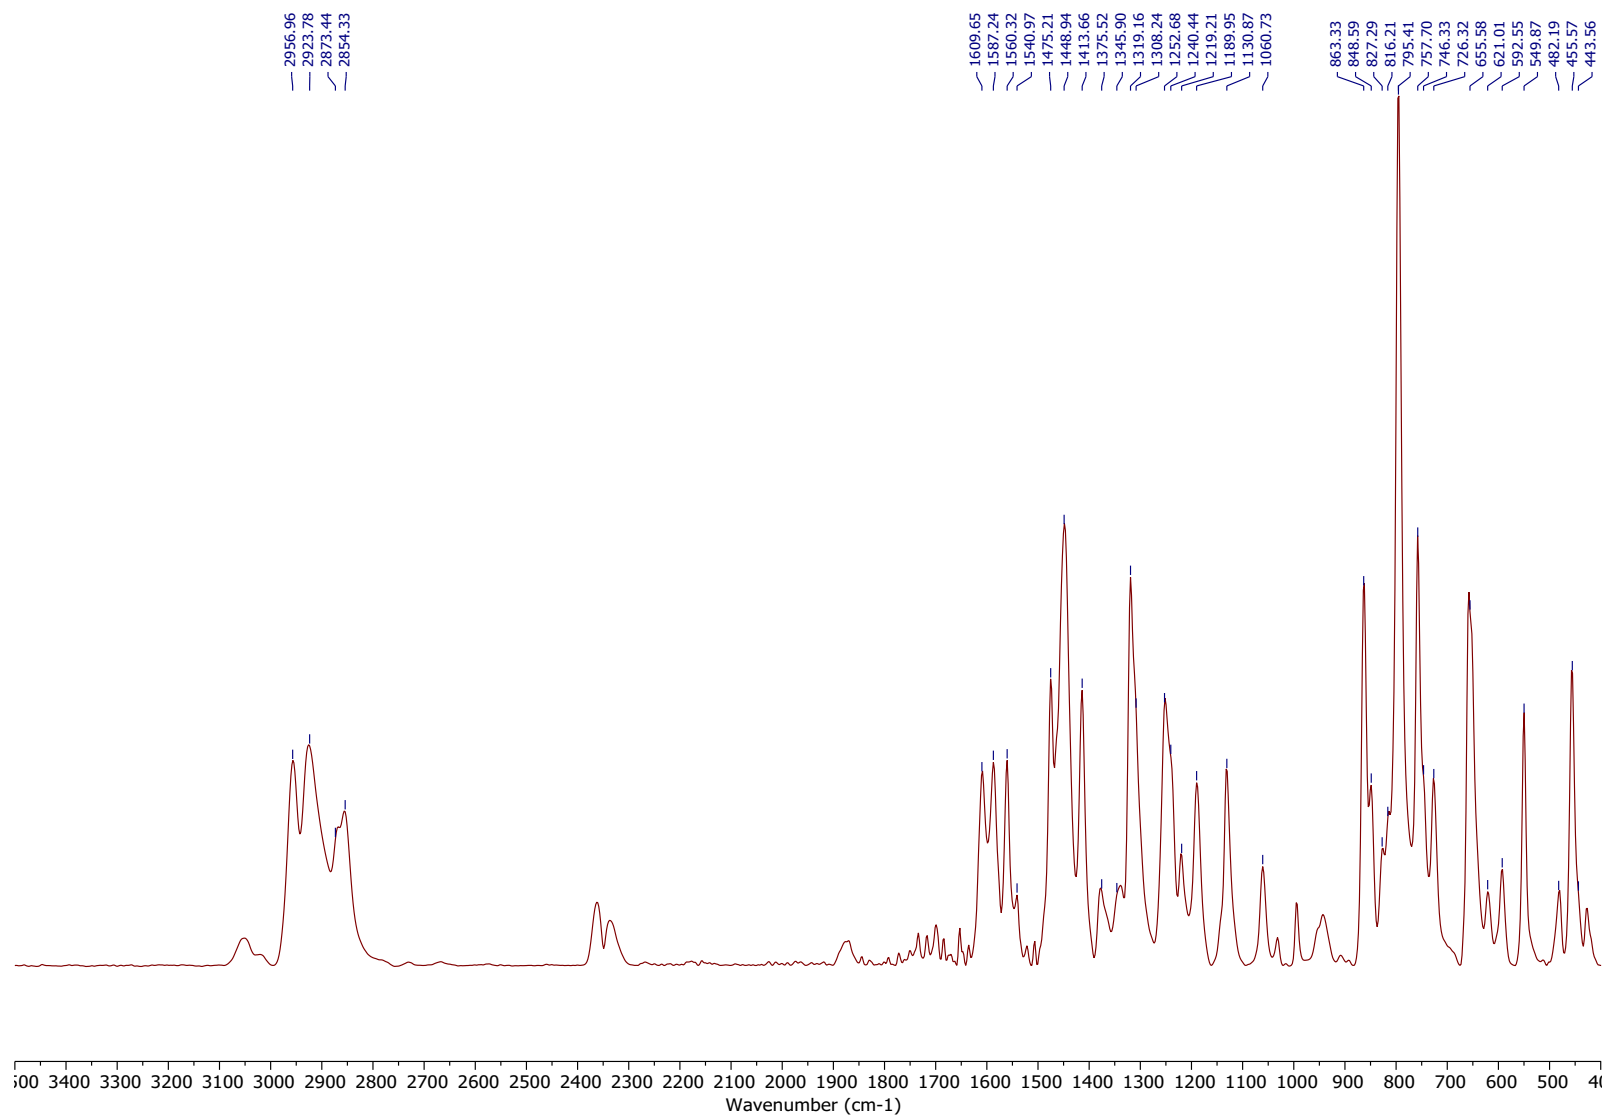

Figure S 23 IR spectrum of [8]CPP4N

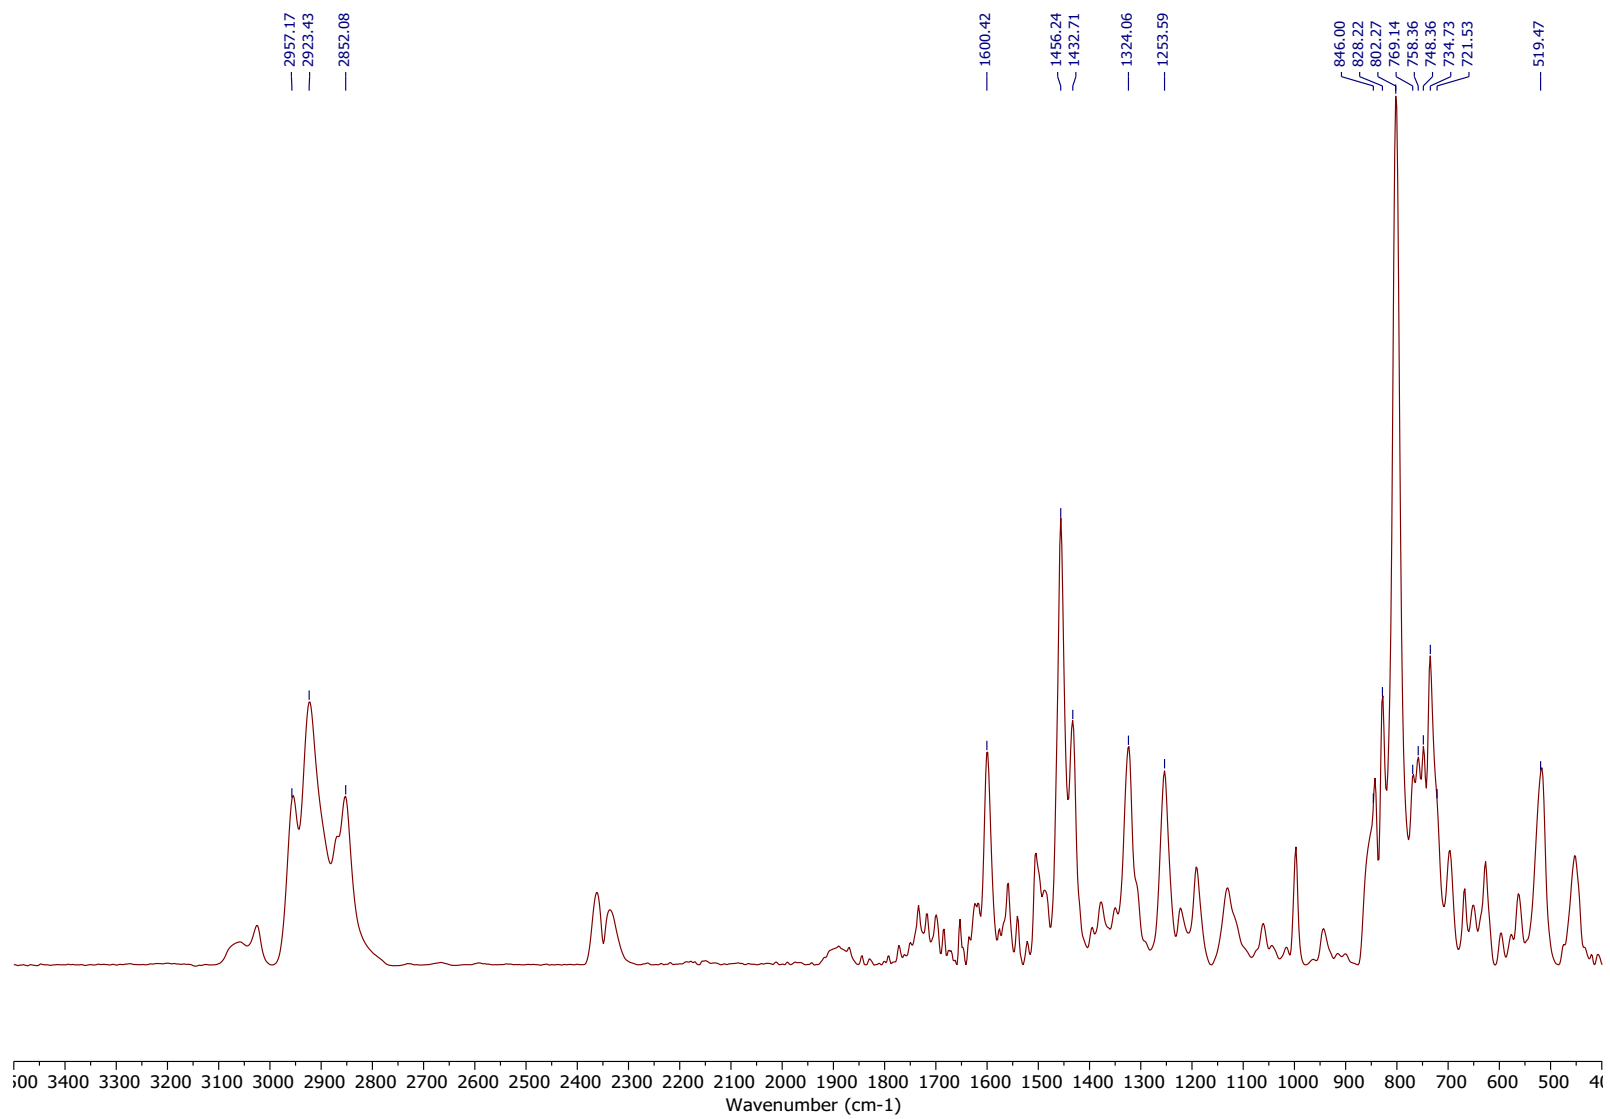

Figure S 24 IR spectrum of [12]CPP3N

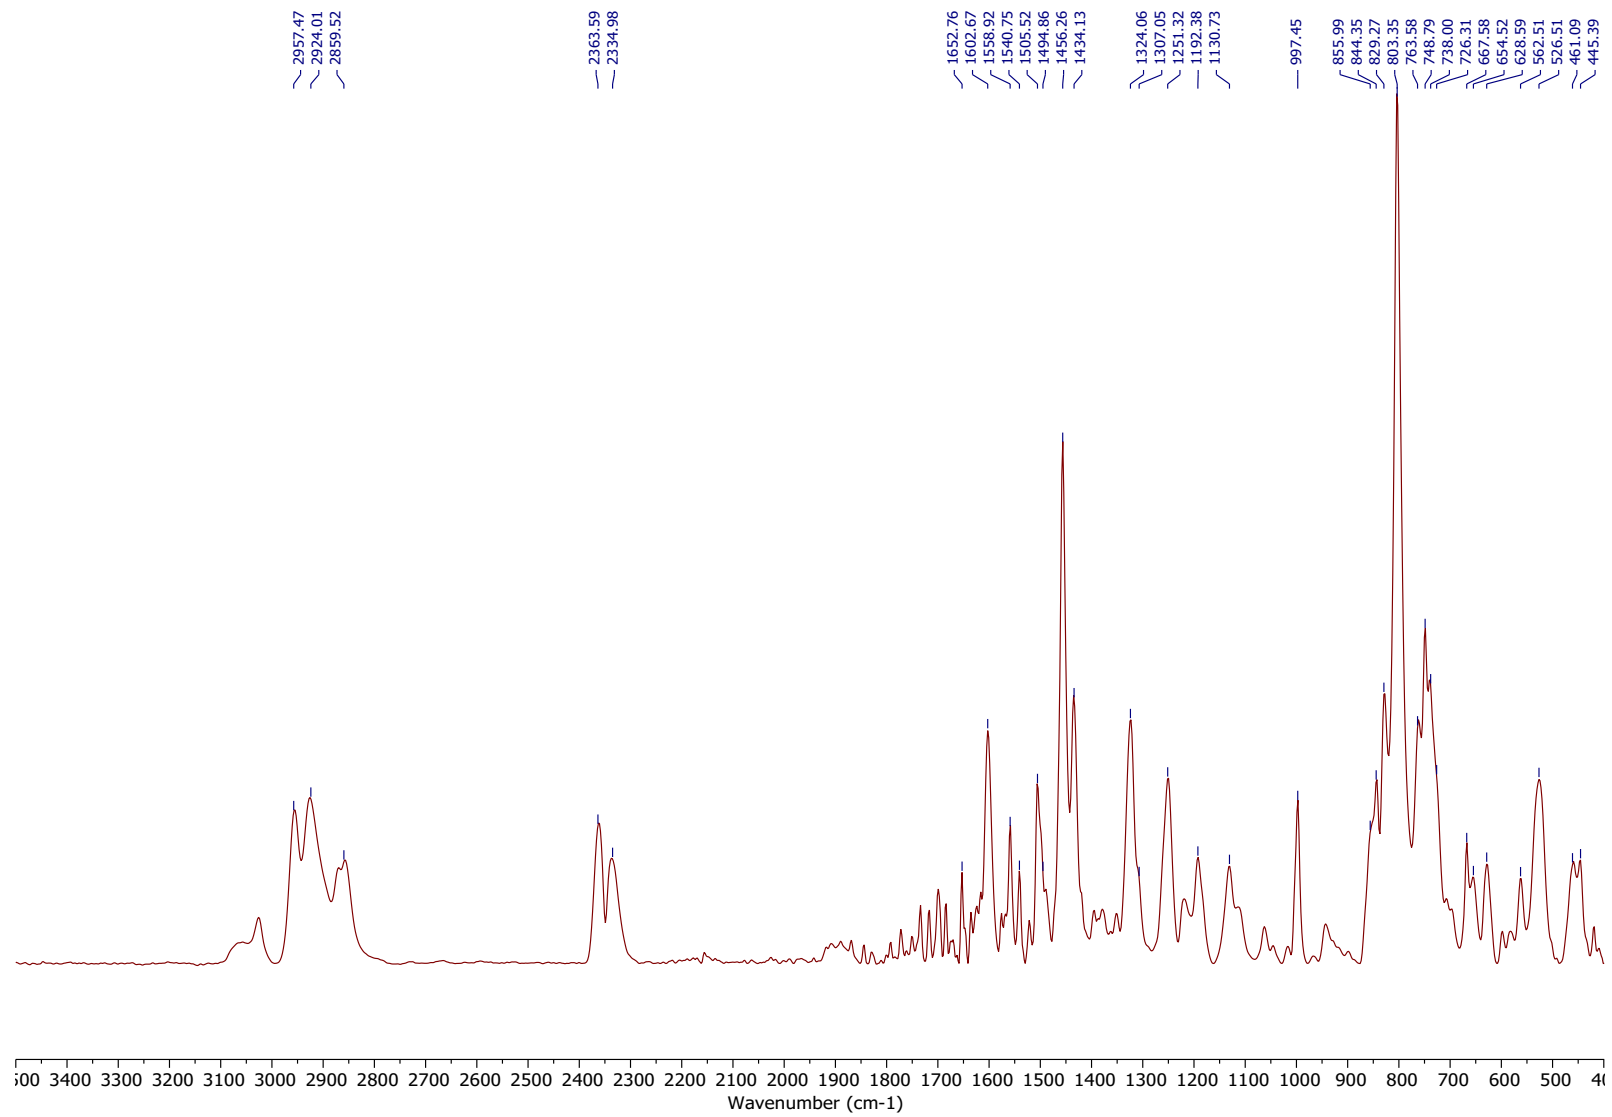

Figure S 25 IR spectrum of [16]CPP4N



## 5 HRMS

### Centre régional de mesures physiques de l'Ouest (CRMPO) - RAPPORT D'ANALYSE

#### Analysis Info

Analysis Name D:\Data\CRMPO\ASAP\_10001\_MS\_01.d  
Method ASAP\_CRMPO\_tune\_low.m  
Sample Name Et Hex Cbz Br2  
Comment F. LUCAS Et Hex Cbz Br2 Température : 130°C

Acquisition Date 06/24/2019 4:31:33 PM

Operator Fabian LAMBERT  
Instrument maXis

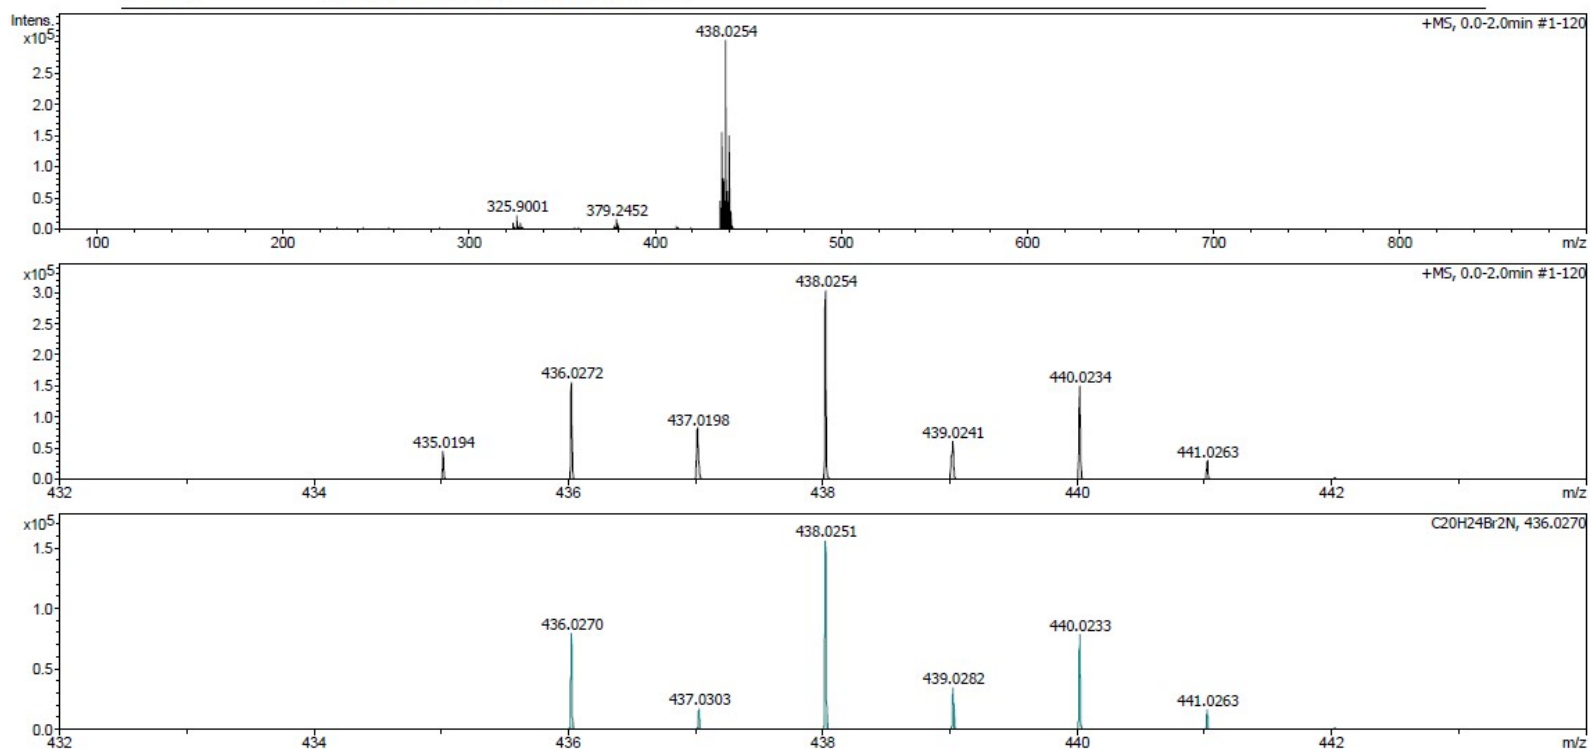

Figure S 26 HRMS of 2,7-dibromo-N-(2-ethylhexyl)-carbazole

## Centre régional de mesures physiques de l'Ouest (CRMPO) - RAPPORT D'ANALYSE

**Analysis Info**  
Analysis Name D:\Data\CRMPO\ASAP\_10000\_MS\_01.d  
Method ASAP\_CRMPO\_tune\_low.m  
Sample Name Et Hex Cbz Bpin  
Comment F. LUCAS Et Hex Cbz Bpin Température : 140°C

Acquisition Date 06/25/2019 2:52:49 PM  
Operator Fabian LAMBERT  
Instrument maXis

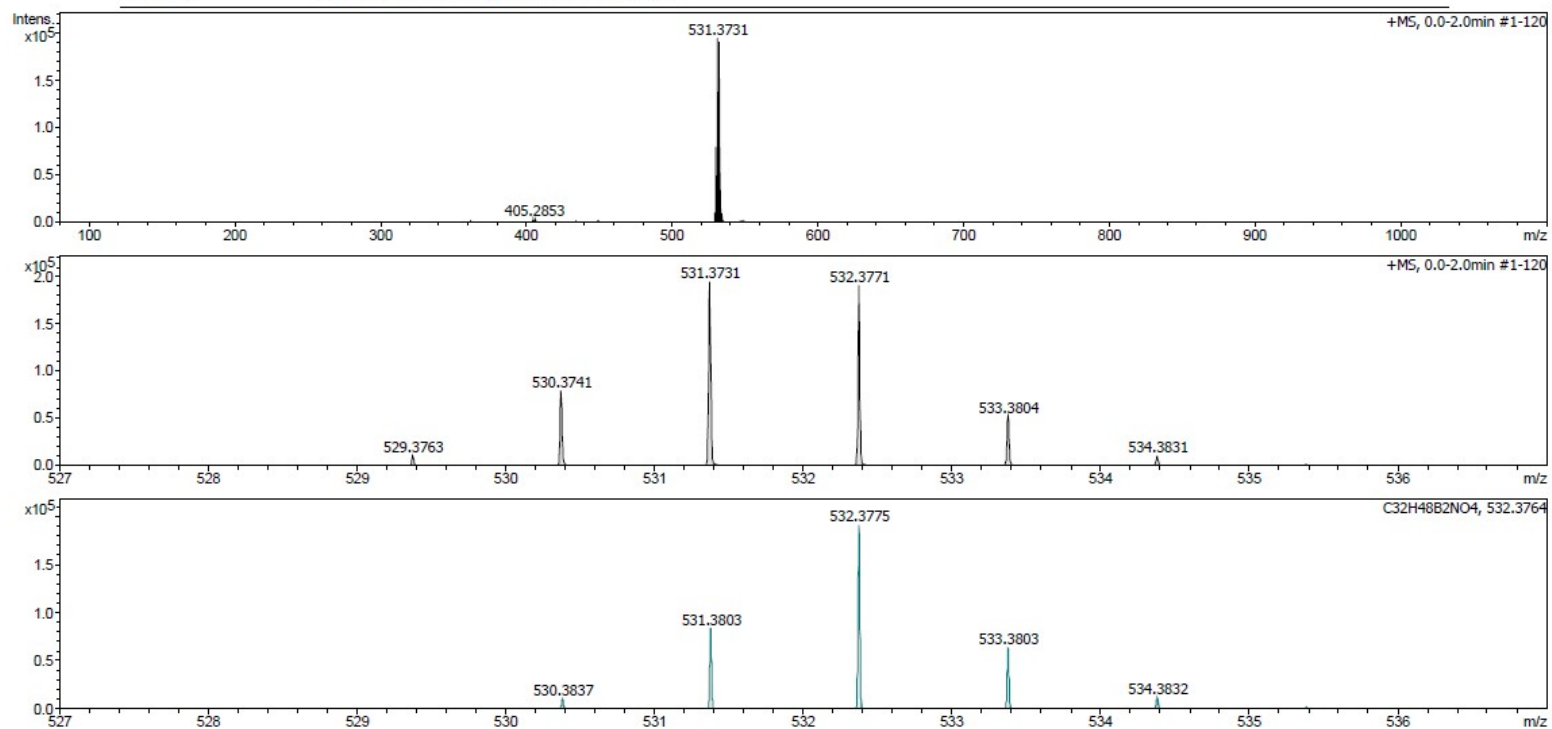

Figure S 27 HRMS of 1

Centre régional de mesures physiques de l'Ouest (CRMPO) - RAPPORT D'ANALYSE

F. LUCAS (PhBr)<sub>2</sub> Et Hex Cbz

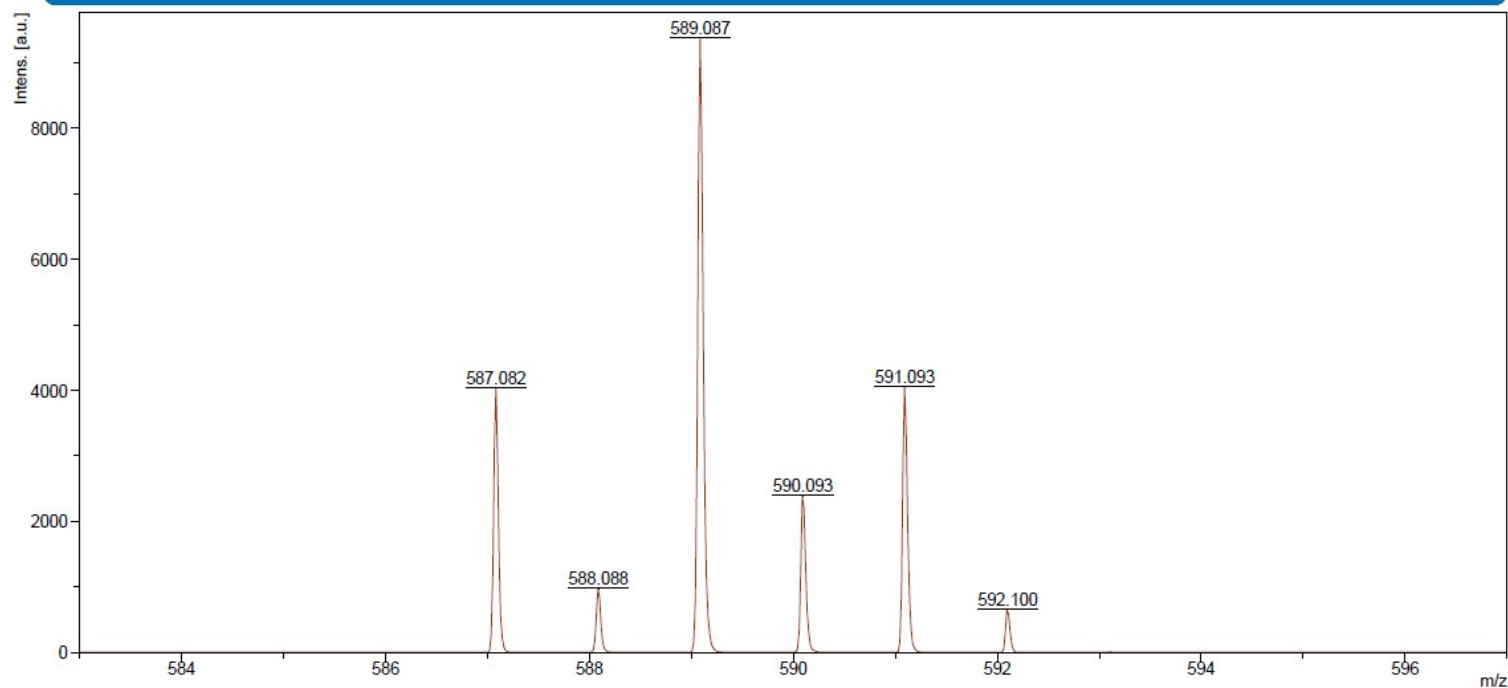

Date of Acquisition 2020-09-02T16:37:55.169+02:00  
Acquisition method D:\Methods\FlexControlMethods\RP\_PepMix.par  
Processing method Matrice : DCTB  
File Name D:\Data\CRMPOMALDI\_11271\_MS\_0110\_1181

**Bruker Daltonics**

Figure S 28 HRMS of 2

# Centre régional de mesures physiques de l'Ouest (CRMPO) - RAPPORT D'ANALYSE

**Analysis Info**  
Analysis Name D:\Data\CRMPO\ESI\_11272\_MS\_02.d  
Method CRMPO\_tune\_low.m  
Sample Name (PhBpin)<sub>2</sub> Et Hex Cbz  
Comment F. LUCAS (PhBpin)<sub>2</sub> Et Hex Cbz Solvant : CH<sub>3</sub>OH/CH<sub>2</sub>Cl<sub>2</sub> (98/2)

Acquisition Date 9/14/2020 12:03:54 PM

Operator Fabian LAMBERT  
Instrument maXis

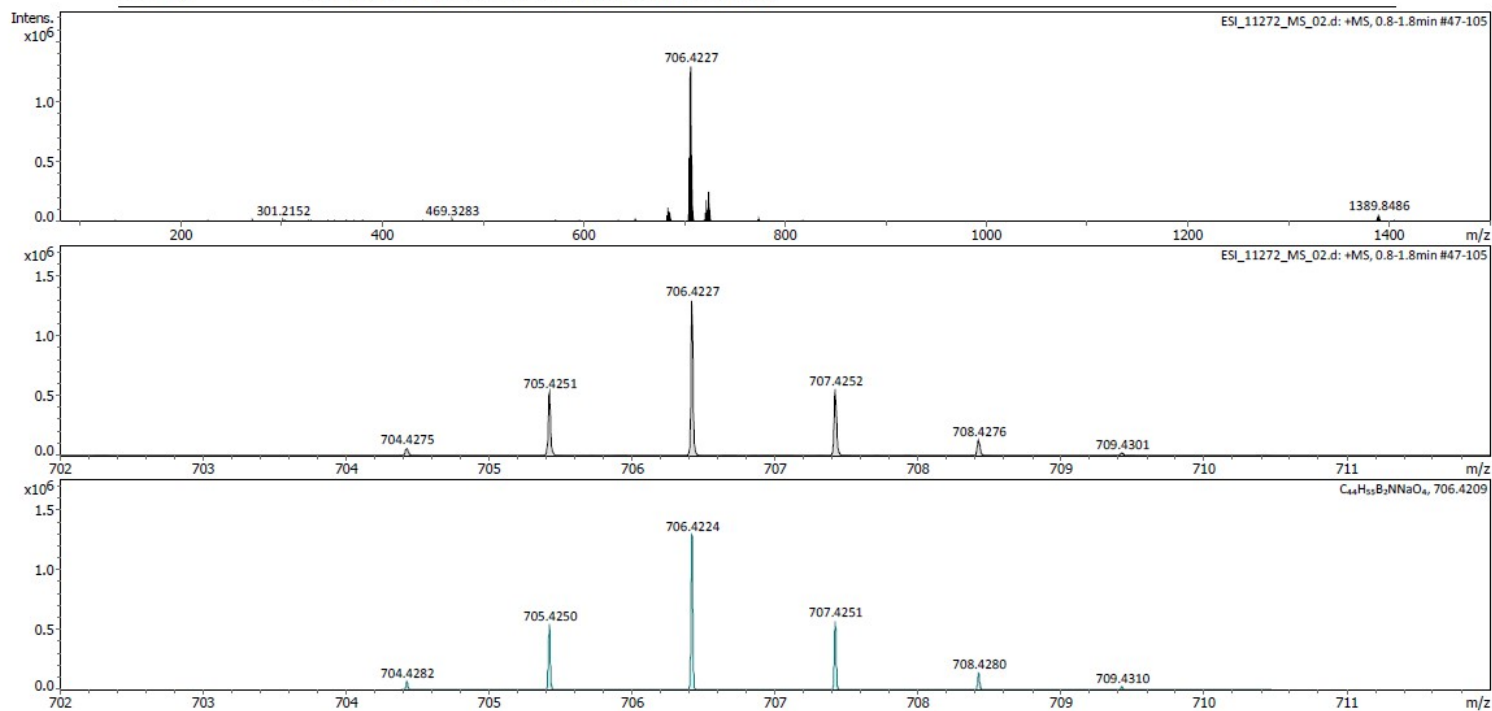

Figure S 29 HRMS of 3

Centre régional de mesures physiques de l'Ouest (CRMPO) - RAPPORT D'ANALYSE

F. LUCAS FL Vol 2-214 F2-SECF3

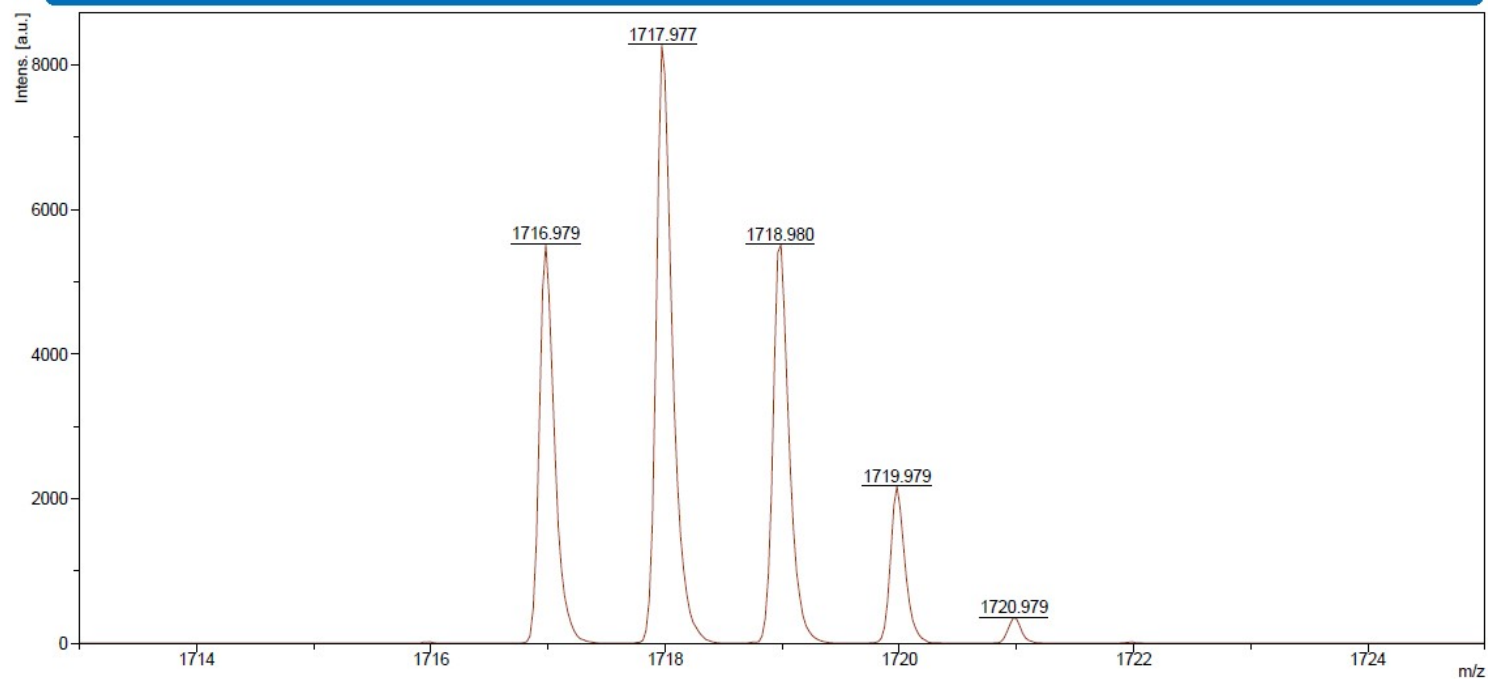

Date of Acquisition 2019-10-08T12:23:33.991+02:00  
Acquisition method D:\Methods\flexControlMethods\RP\_PepMix.par  
Processing method Matrice : DCTB  
File Name D:\Data\CRMPO\MALDI\_10304\_MS\_0110\_A19\1

**Bruker Daltonics**

Figure S 30 HRMS of [16]CPP4N

Centre régional de mesures physiques de l'Ouest (CRMPO) - RAPPORT D'ANALYSE

F. LUCAS FL Vol 2-214 F2-SECF5

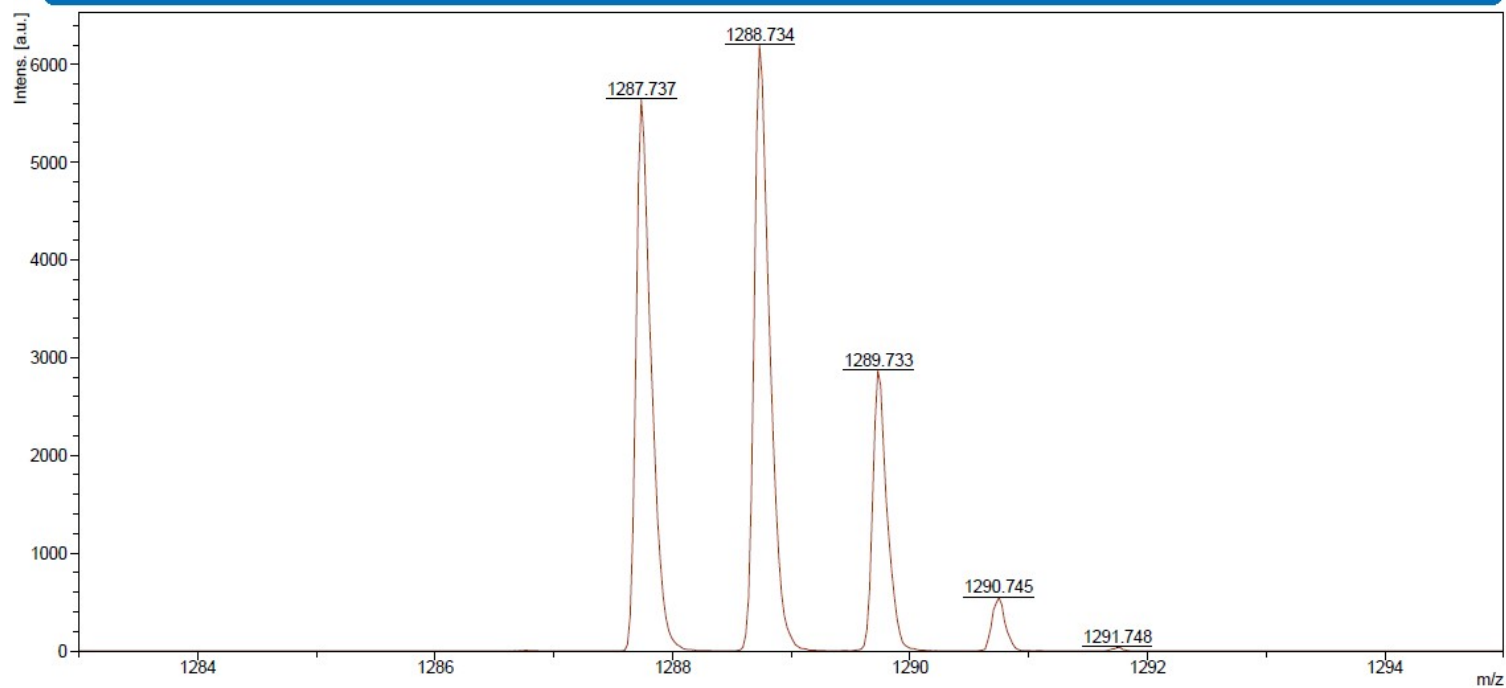

Date of Acquisition 2019-10-08T12:48:10.741+02:00  
Acquisition method D:\Methods\flexControlMethods\RP\_PepMix.par  
Processing method Matrice : DCTB  
File Name D:\Data\CRMPO\MALDI\_10305\_MS\_0310\_A2011

**Bruker Daltonics**

Figure S 31 HRMS of [12]CPP3N

## Centre régional de mesures physiques de l'Ouest (CRMPO) - RAPPORT D'ANALYSE

### Analysis Info

Analysis Name D:\Data\CRMPO\ASAP\_9994\_MS\_01.d  
Method ASAP\_CRMPO\_tune\_mid.m  
Sample Name C Et Hex Cbz  
Comment F. LUCAS [4]C Et Hex Cbz Température : 300°C

Acquisition Date 06/26/2019 3:58:46 PM

Operator Fabian LAMBERT  
Instrument maXis

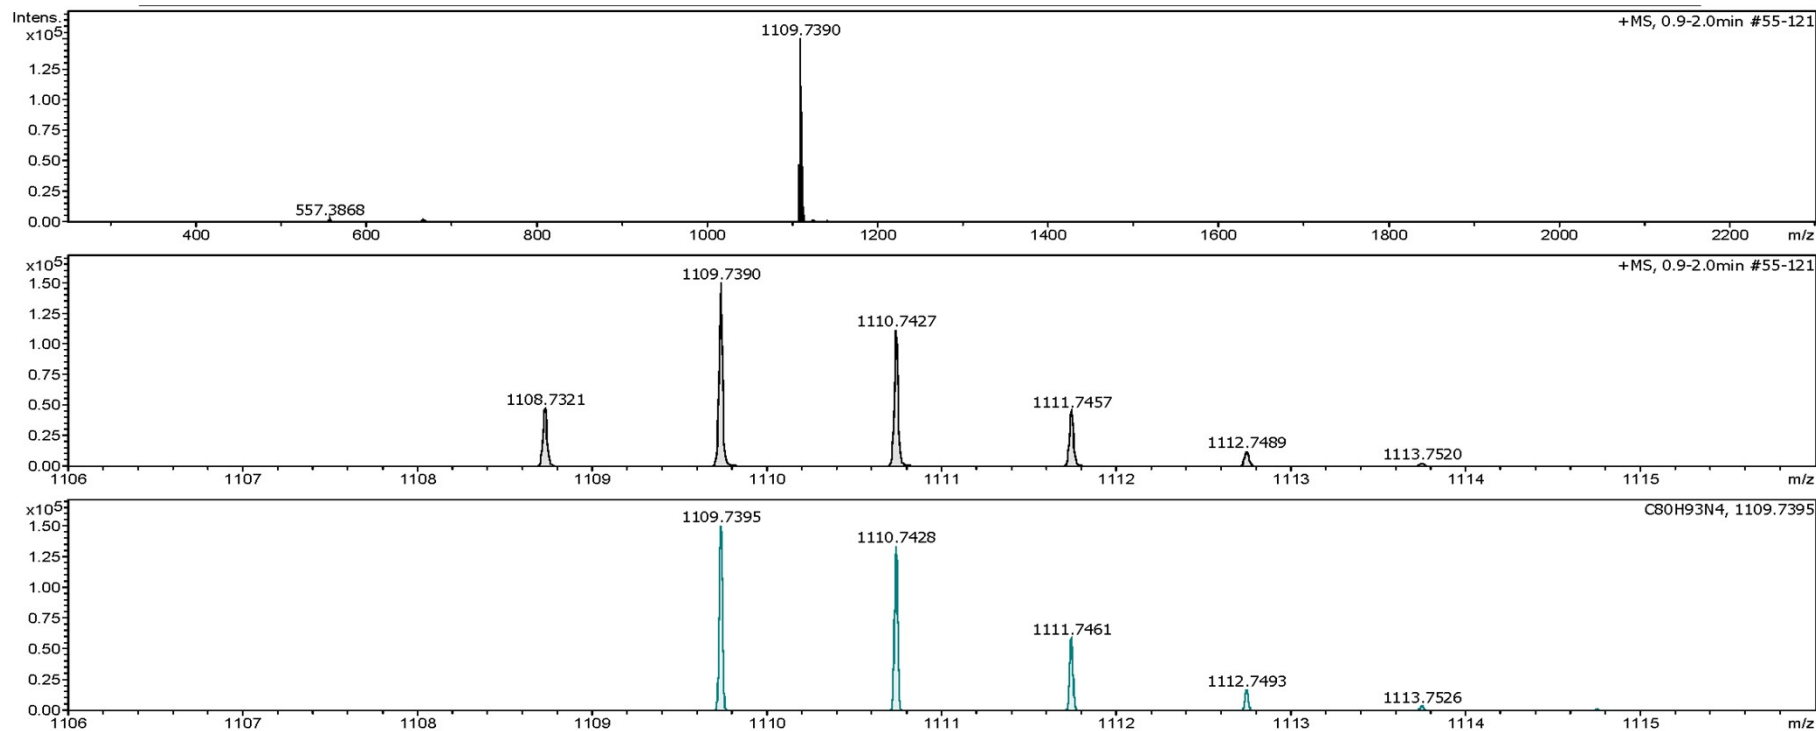

Figure S 32 HRMS of [8]CPP4N

## 6 Electrochemical studies

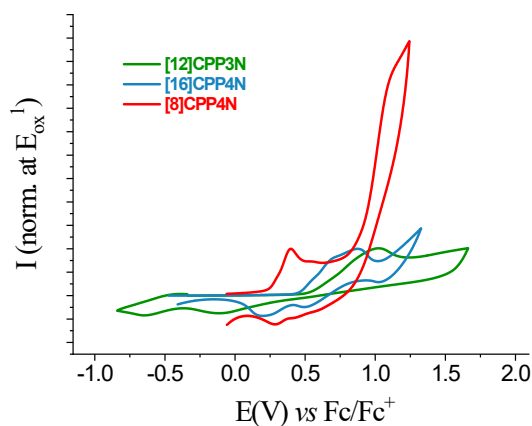

Figure S 33. Cyclic voltammograms of [16]CPP4N, [12]CPP3N and [8]CPP4N in oxidation showing additional oxidation processes at high potential values,  $C_2H_2Cl_4 + Bu_4NPF_6$ , 0.2 M,  $100 \text{ mV}\cdot\text{s}^{-1}$

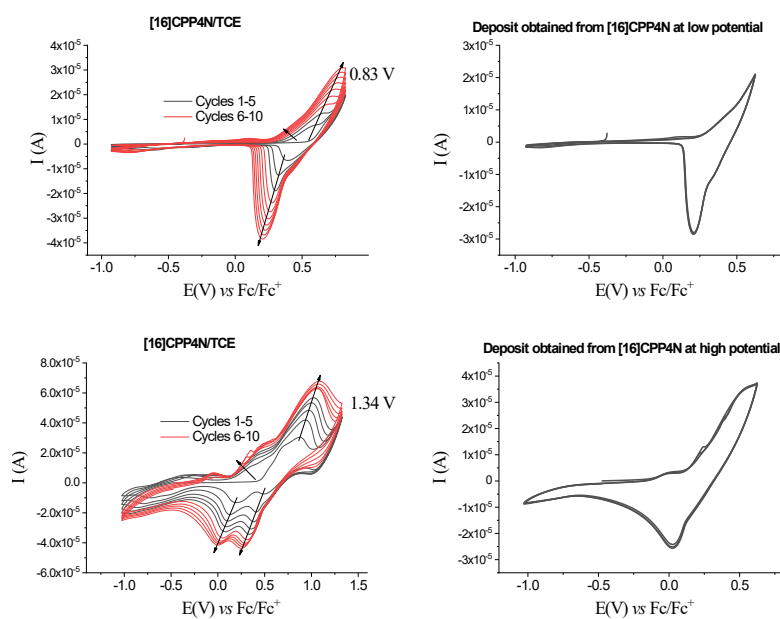

Figure S 34. Cyclic voltammograms recorded in  $C_2H_2Cl_4 + Bu_4NPF_6$ , 0.2 M. Left: ten cycles up to 0.85 V (top) or 1.34 V (bottom) in presence of [16]CPP4N. Right: electrochemical behaviour of the deposit covering the platinum after the 10 Cycles.

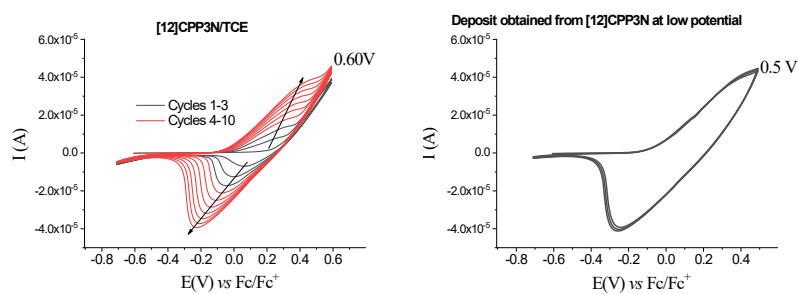



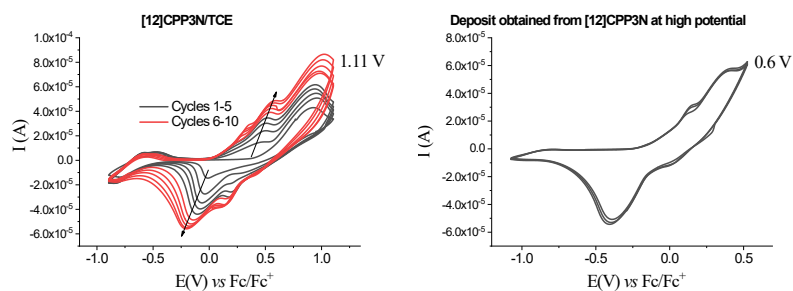

Figure S 35. Cyclic voltammograms recorded in  $\text{C}_2\text{H}_2\text{Cl}_4 + \text{Bu}_4\text{NPF}_6$ , 0.2 M. Left: ten cycles up to 0.6 V (top) or 1.11 V (bottom) in presence of [12]CPP3N. Right: electrochemical behaviour of the deposit covering the platinum after the 10 Cycles.

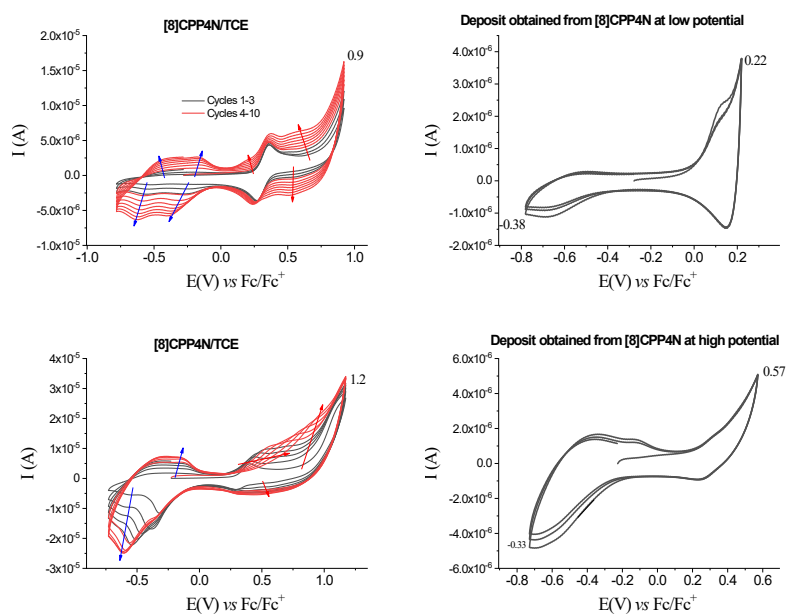

Figure S 36. Cyclic voltammograms recorded in  $\text{C}_2\text{H}_2\text{Cl}_4 + \text{Bu}_4\text{NPF}_6$ , 0.2 M. Left: ten cycles up to 0.9 V (top) or 1.2 V (bottom) in presence of [8]CPP4N. Right: electrochemical behaviour of the deposit covering the platinum after the 10 Cycles.

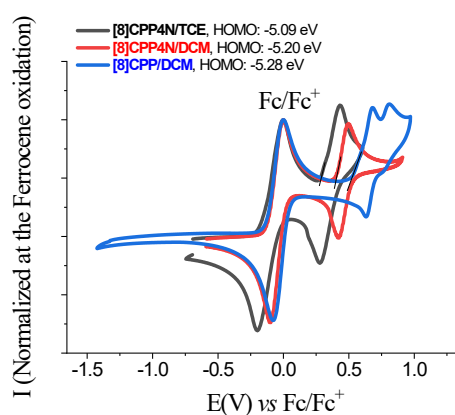

Figure S 37. Comparison of the cyclic voltammograms of [8]CPP4N recorded in  $\text{C}_2\text{H}_2\text{Cl}_4 + \text{Bu}_4\text{NPF}_6$ , 0.2 M (black line) or in  $\text{CH}_2\text{Cl}_2 + \text{Bu}_4\text{NPF}_6$ , 0.2 M (red line) with that of [8]CPP recorded in  $\text{CH}_2\text{Cl}_2 + \text{Bu}_4\text{NPF}_6$ , 0.2 M (blue line) in presence of ferrocene. Sweep-rate  $100 \text{ mV} \cdot \text{s}^{-1}$ .

## 7 Photophysical properties

The spectroscopic properties of the three nano hoops have been studied in both cyclohexane (apolar solvent usually used for spectroscopic study but in which [8]CPP4N and [12]CPP3N are only slightly soluble) and chloroform (in which the three nano hoops are soluble enough to measure a molar extinction coefficient).

### 7.1. Photophysical properties of [12]CPP3N

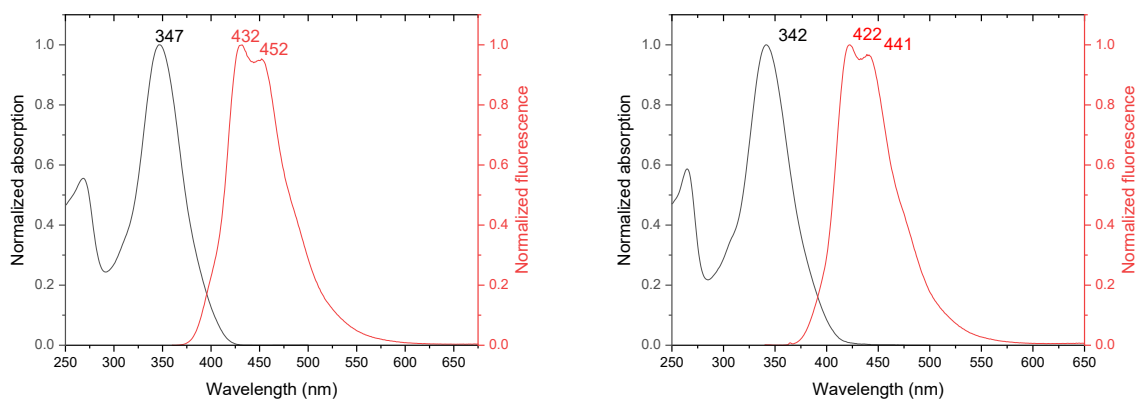

Figure S 38. Normalized absorption and fluorescence spectra of [12]CPP3N in chloroform (left) and in cyclohexane (right)

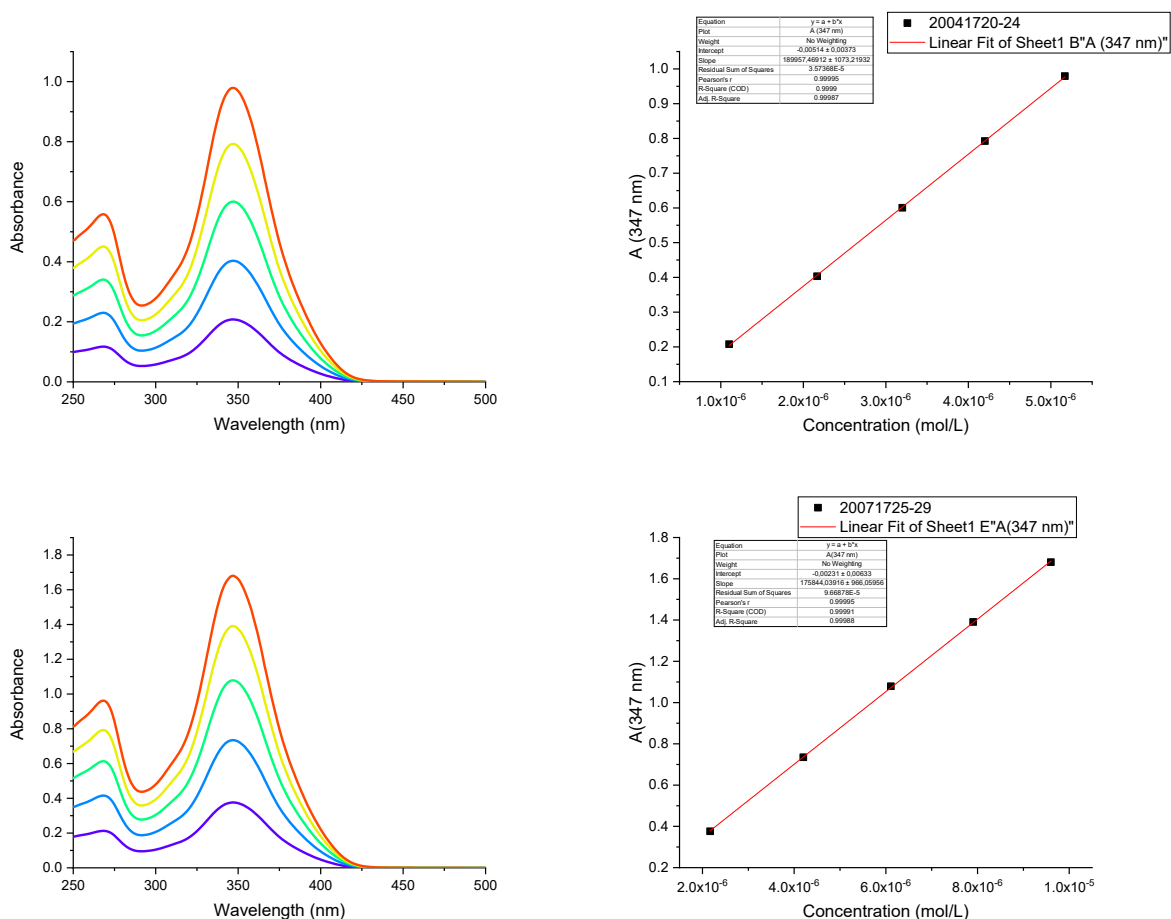

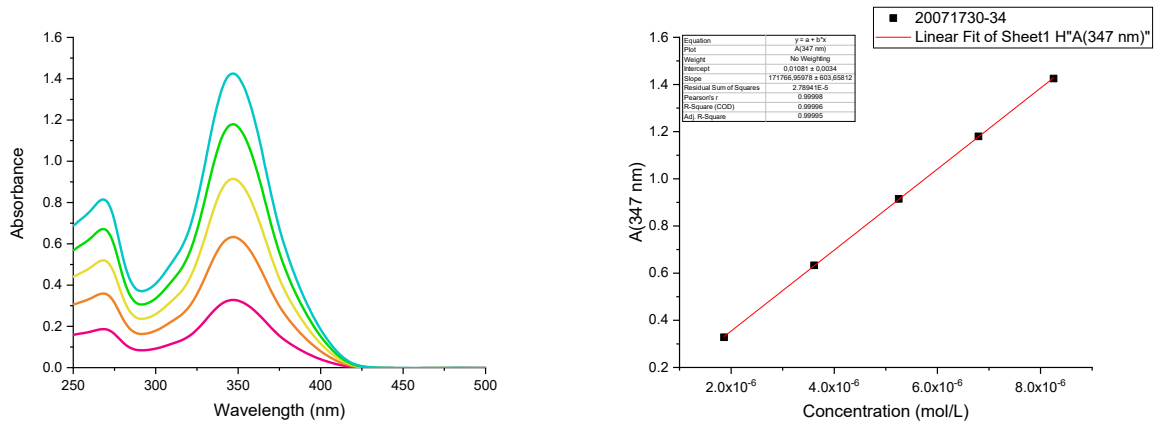

Figure S 39. Determination of the molar extinction coefficient of [12]CPP3N in chloroform

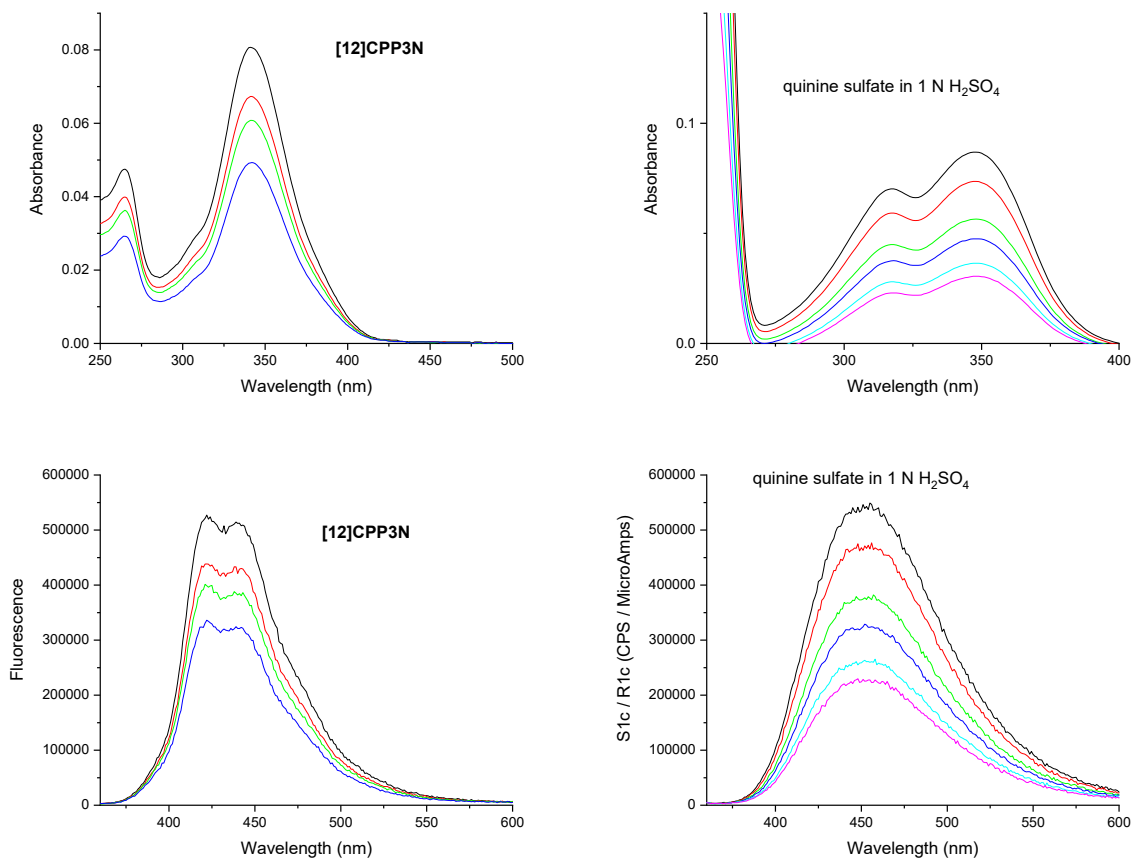

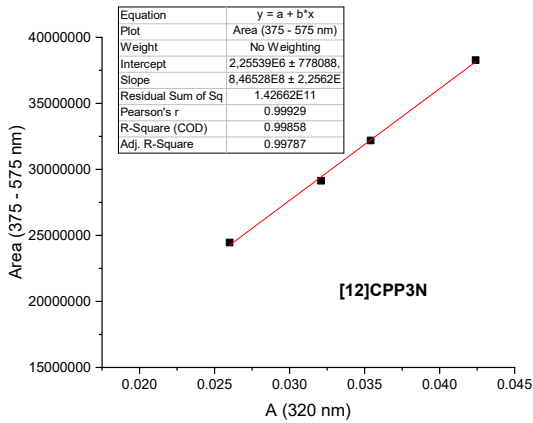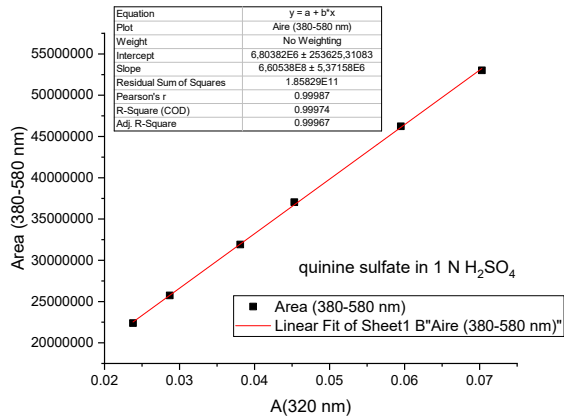

|                  | Quinine sulfate in H <sub>2</sub> SO <sub>4</sub> | [12]CPP3N |
|------------------|---------------------------------------------------|-----------|
| slope            | 6.61E+08                                          | 8.47E+08  |
| refracting index | 1.336                                             | 1.42662   |
| QY               | 0.546                                             | 7.98E-01  |

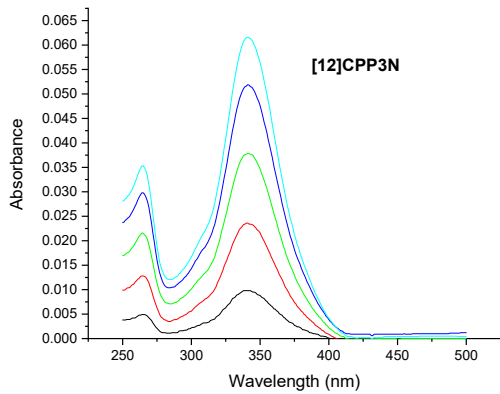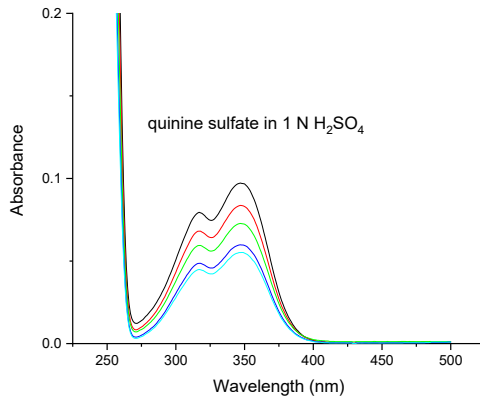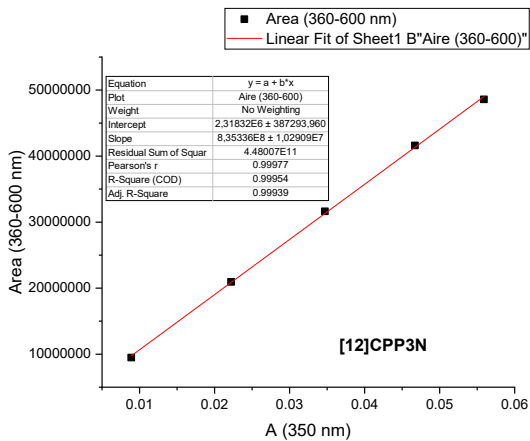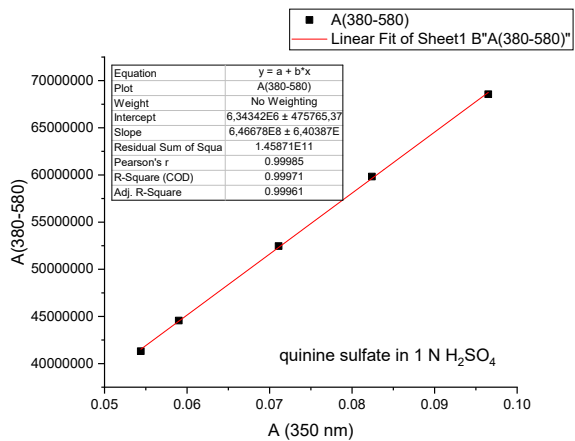

|                  | Quinine sulfate in H <sub>2</sub> SO <sub>4</sub> | [12]CPP3N |
|------------------|---------------------------------------------------|-----------|
| slope            | 6.47E+08                                          | 8.35E+08  |
| refracting index | 1.336                                             | 1.42662   |
| QY               | 0.546                                             | 8.04E-01  |

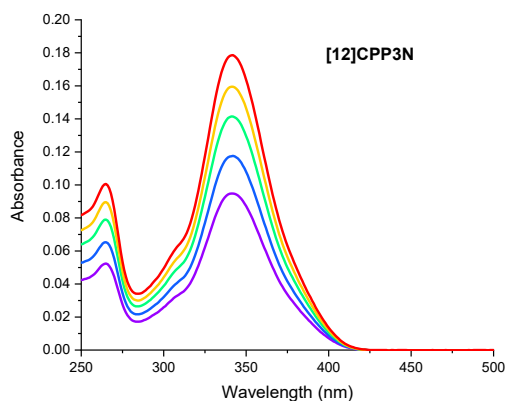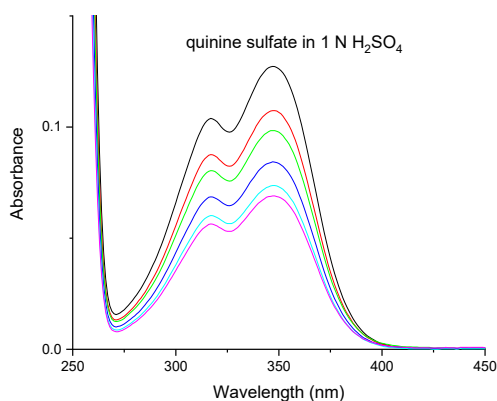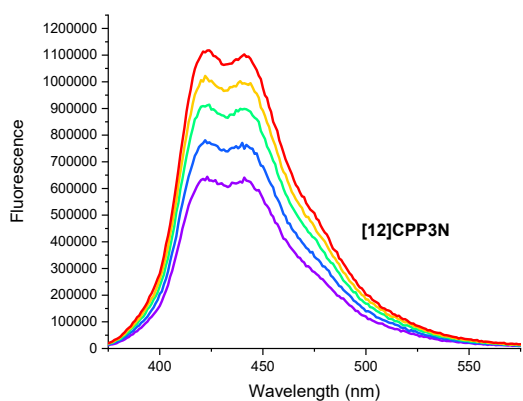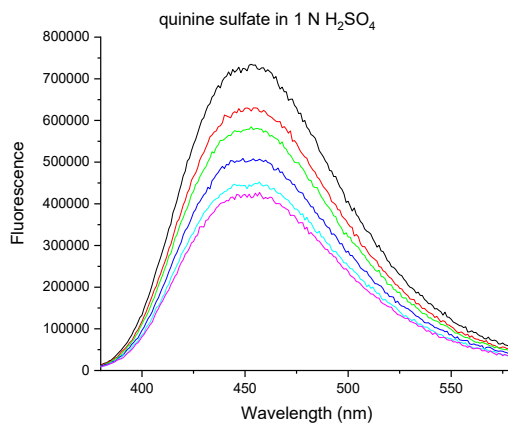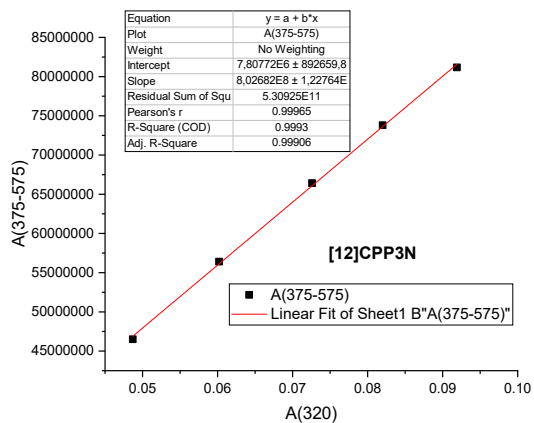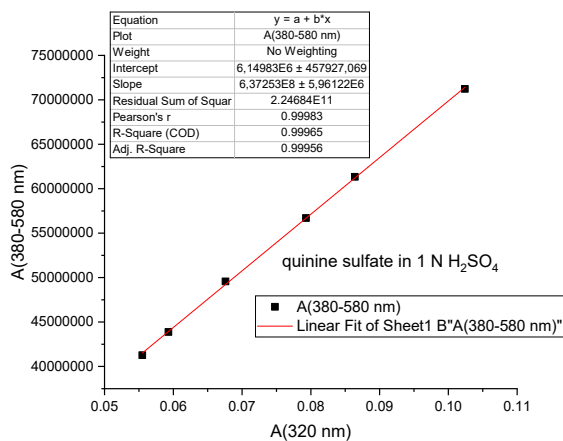

|                  | Quinine sulfate in H <sub>2</sub> SO <sub>4</sub> | [12]CPP3N |
|------------------|---------------------------------------------------|-----------|
| slope            | 6.37E+08                                          | 8.03E+08  |
| refracting index | 1.336                                             | 1.42662   |
| QY               | 0.546                                             | 7.84E-01  |

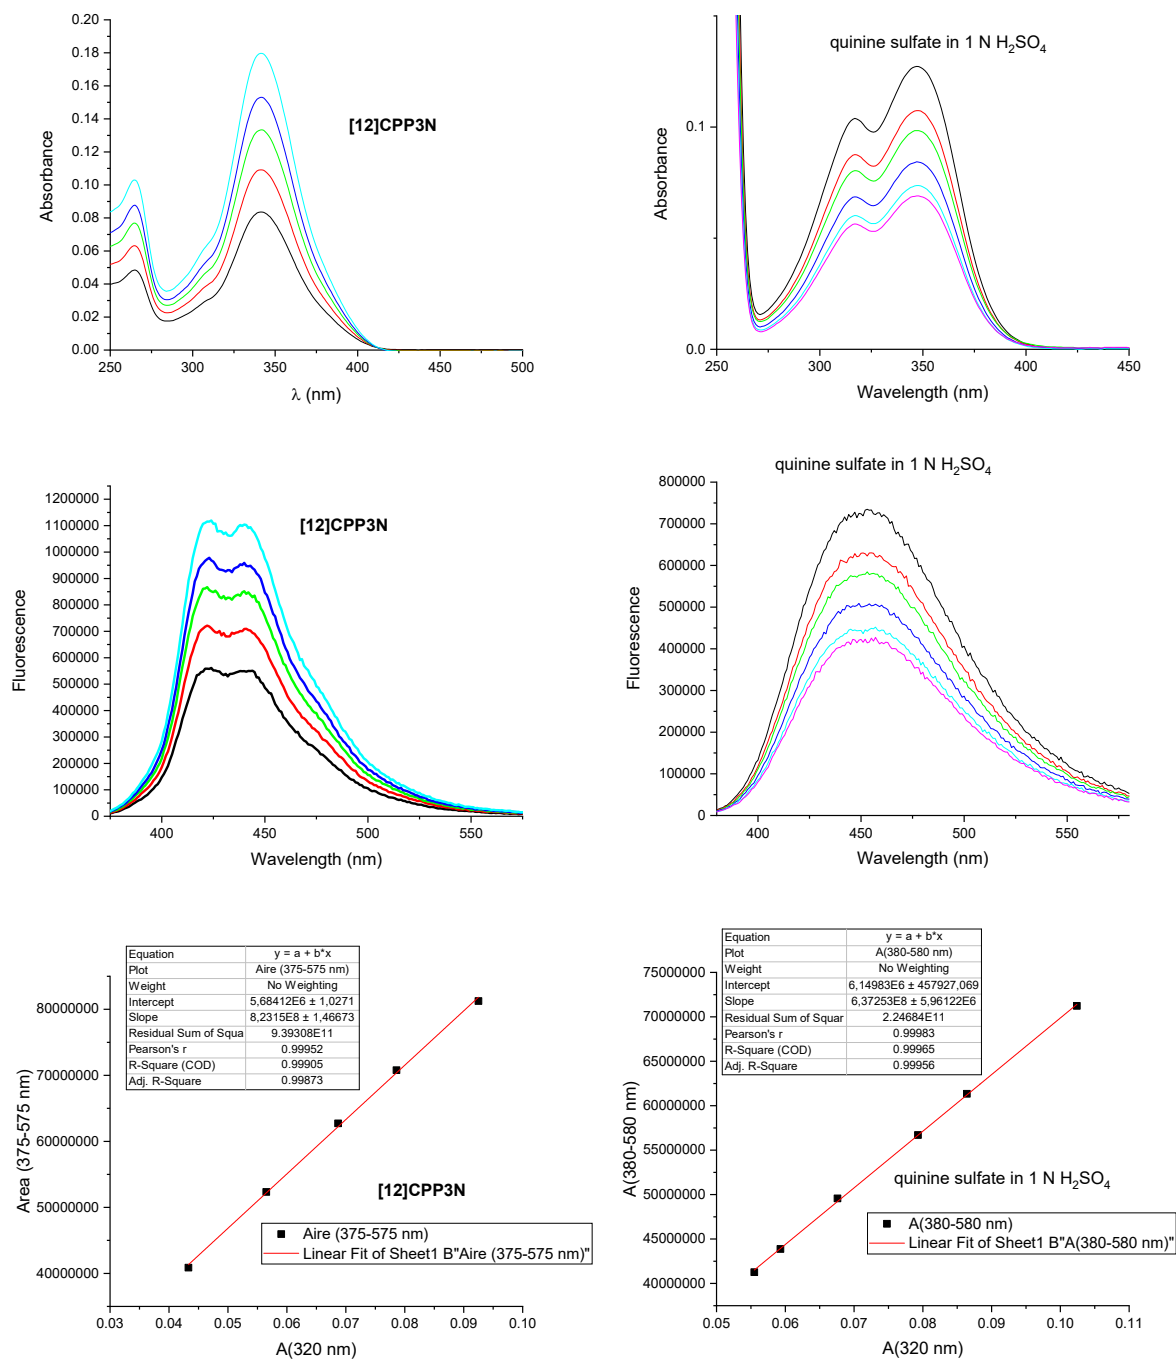

|                  | Quinine sulfate in H <sub>2</sub> SO <sub>4</sub> | [12]CPP3N |
|------------------|---------------------------------------------------|-----------|
| slope            | 6.37E+08                                          | 8.23E+08  |
| refracting index | 1.336                                             | 1.42662   |
| QY               | 0.546                                             | 8.04E-01  |

Figure S 40. Determination of the quantum yield of [12]CPP3N in cyclohexane

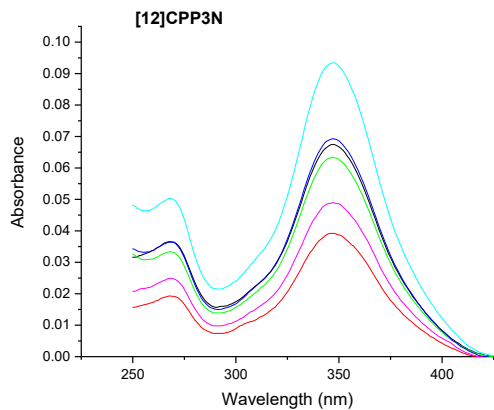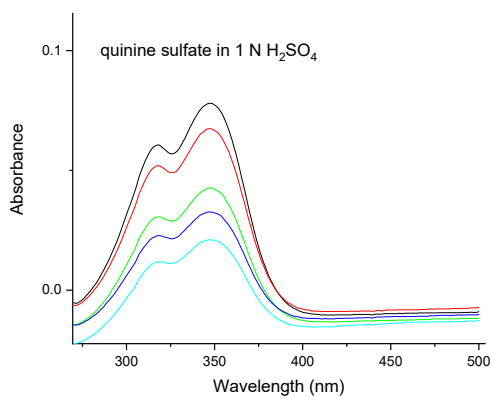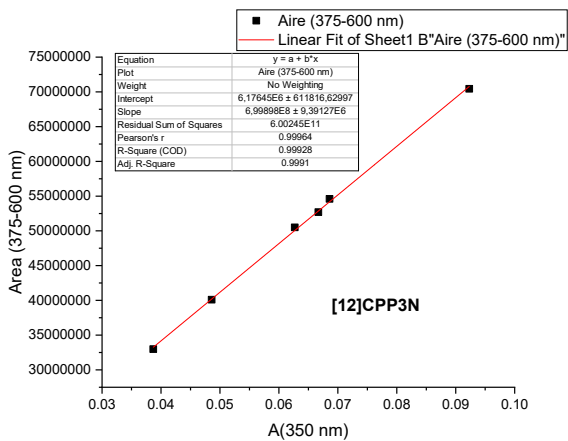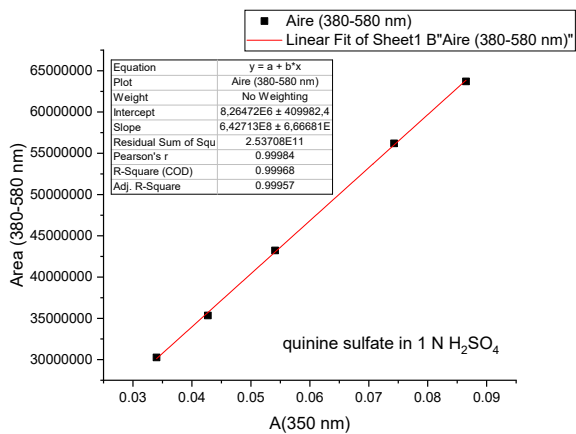

|                  | Quinine sulfate in H <sub>2</sub> SO <sub>4</sub> | [12]CPP3N |
|------------------|---------------------------------------------------|-----------|
| slope            | 6.43E+08                                          | 7.00E+08  |
| refracting index | 1.336                                             | 1.445     |
| QY               | 0.546                                             | 6.96E-01  |

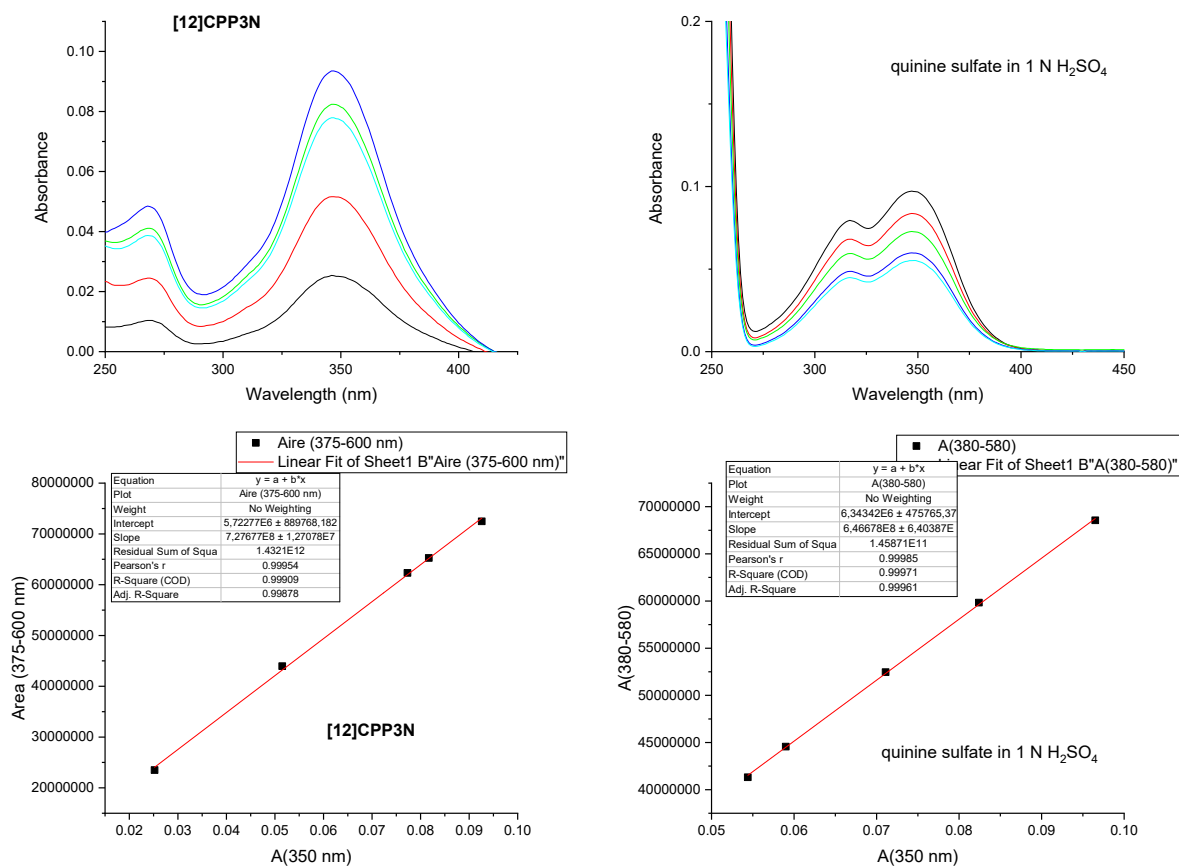

|                  | Quinine sulfate in H <sub>2</sub> SO <sub>4</sub> | [12]CPP3N |
|------------------|---------------------------------------------------|-----------|
| slope            | 6.47E+08                                          | 7.28E+08  |
| refracting index | 1.336                                             | 1.445     |
| QY               | 0.546                                             | 7.19E-01  |

Figure S 41. Determination of the quantum yield of [12]CPP3N in chloroform

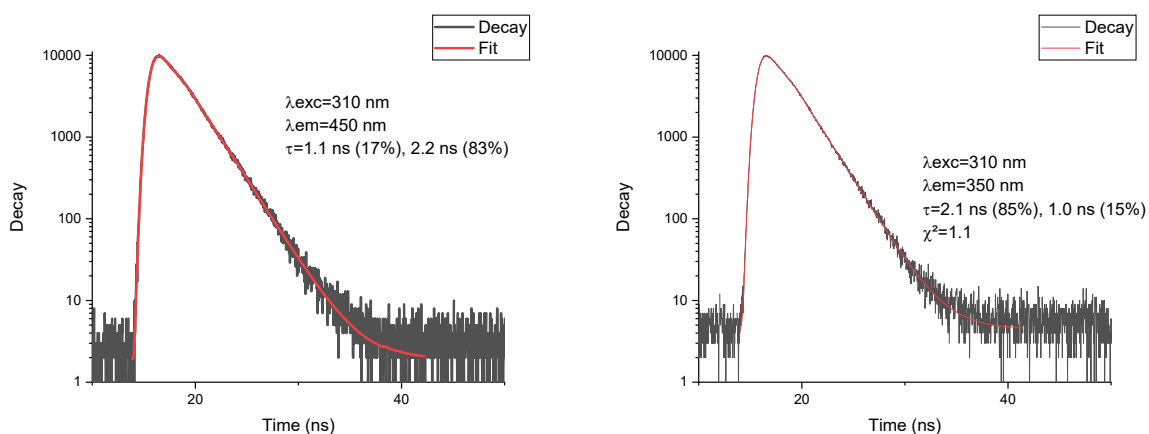

Figure S 42. Fluorescence lifetimes of [12]CPP3N in chloroform (left) and in cyclohexane (right)



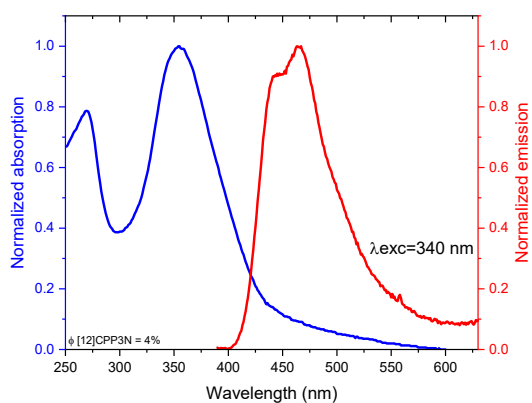

Figure S 43. Absorption and emission spectra of [12]CPP3N in thin film

## 7.2. Photophysical properties of [16]CPP4N

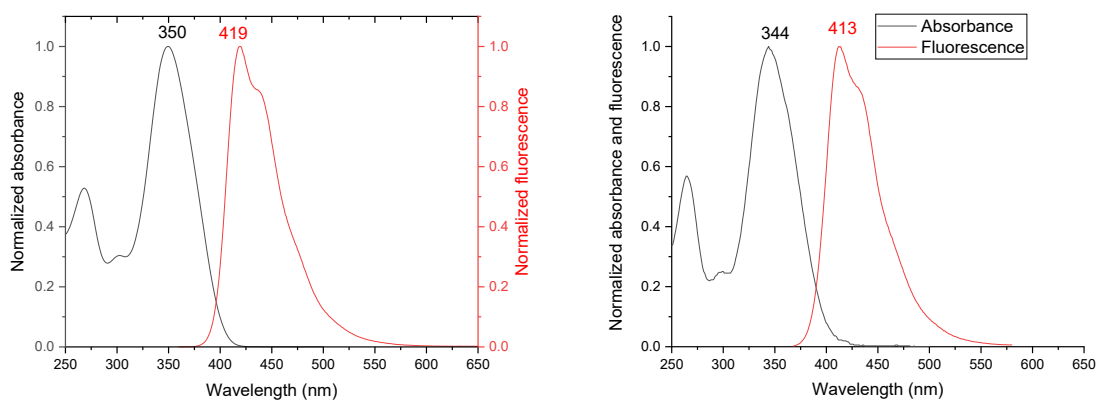

Figure S 44. Normalized absorption and fluorescence spectra of [16]CPP4N in chloroform (left) and in cyclohexane (right)

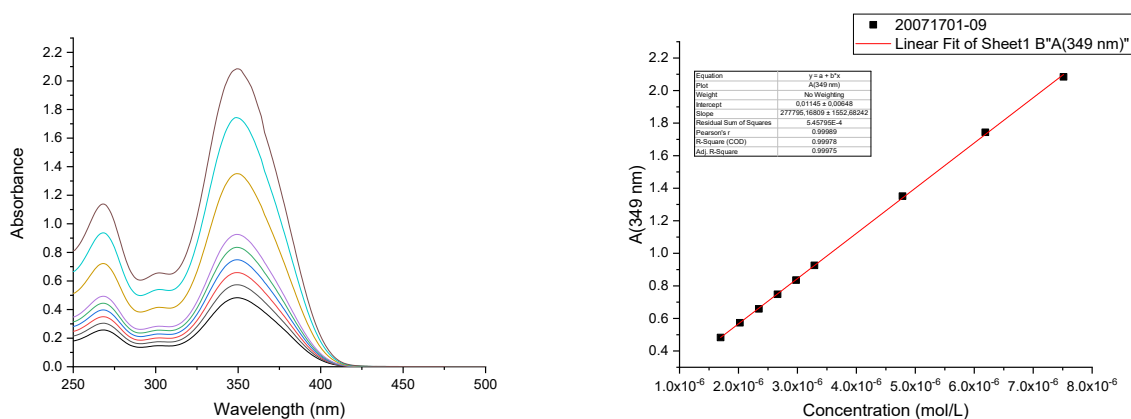

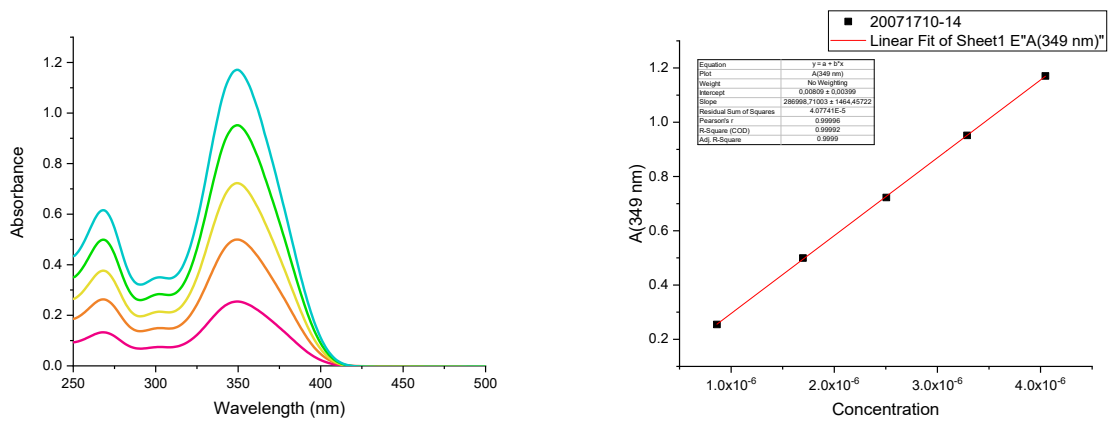

Figure S 45. Determination of the molar extinction coefficient of [16]CPP4N in chloroform

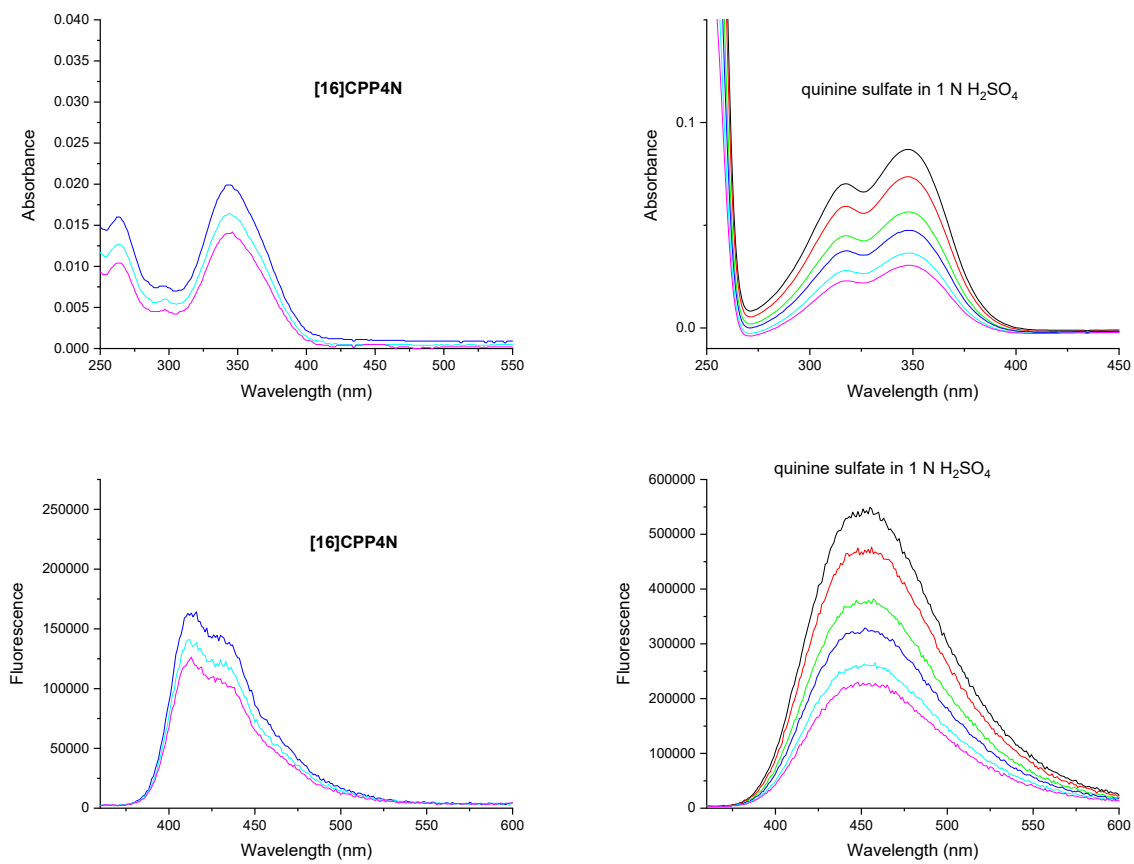

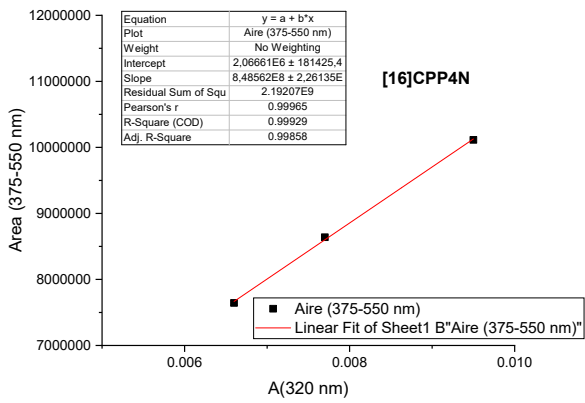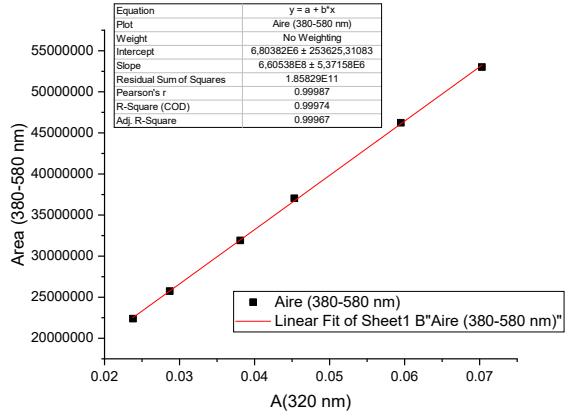

|                  | Quinine sulfate in H <sub>2</sub> SO <sub>4</sub> | [16]CPP4N |
|------------------|---------------------------------------------------|-----------|
| slope            | 6.61E+08                                          | 8.49E+08  |
| refracting index | 1.336                                             | 1.42662   |
| QY               | 0.546                                             | 8.00E-01  |

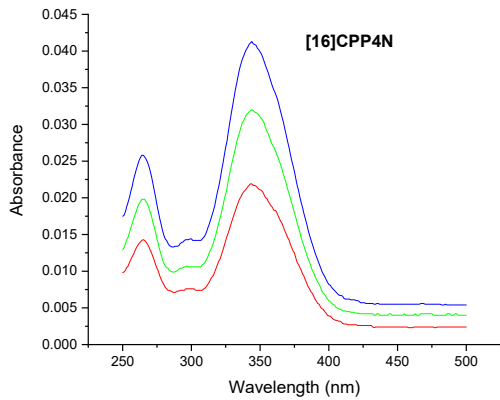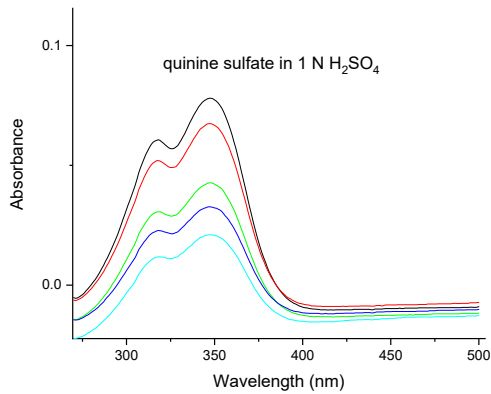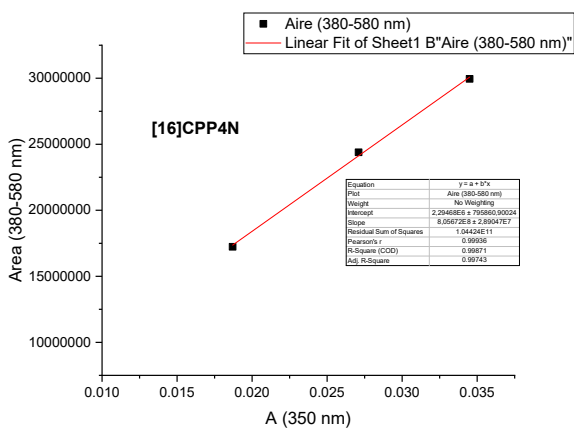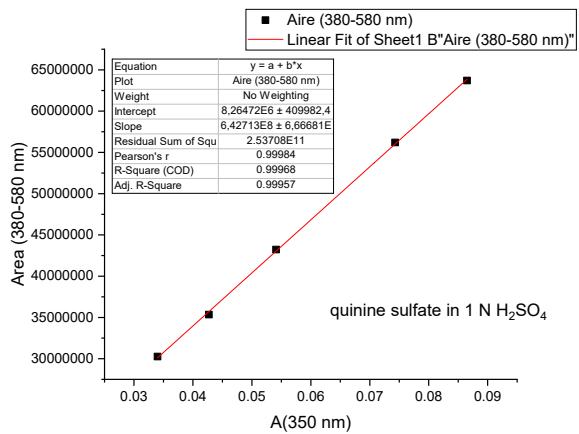

|                  | Quinine sulfate in H <sub>2</sub> SO <sub>4</sub> | [16]CPP4N |
|------------------|---------------------------------------------------|-----------|
| slope            | 6.43E+08                                          | 8.06E+08  |
| refracting index | 1.336                                             | 1.42662   |

|    |       |          |
|----|-------|----------|
| QY | 0.546 | 7.80E-01 |
|----|-------|----------|

Figure S 46. Determination of the quantum yield of [16]CPP4N in cyclohexane

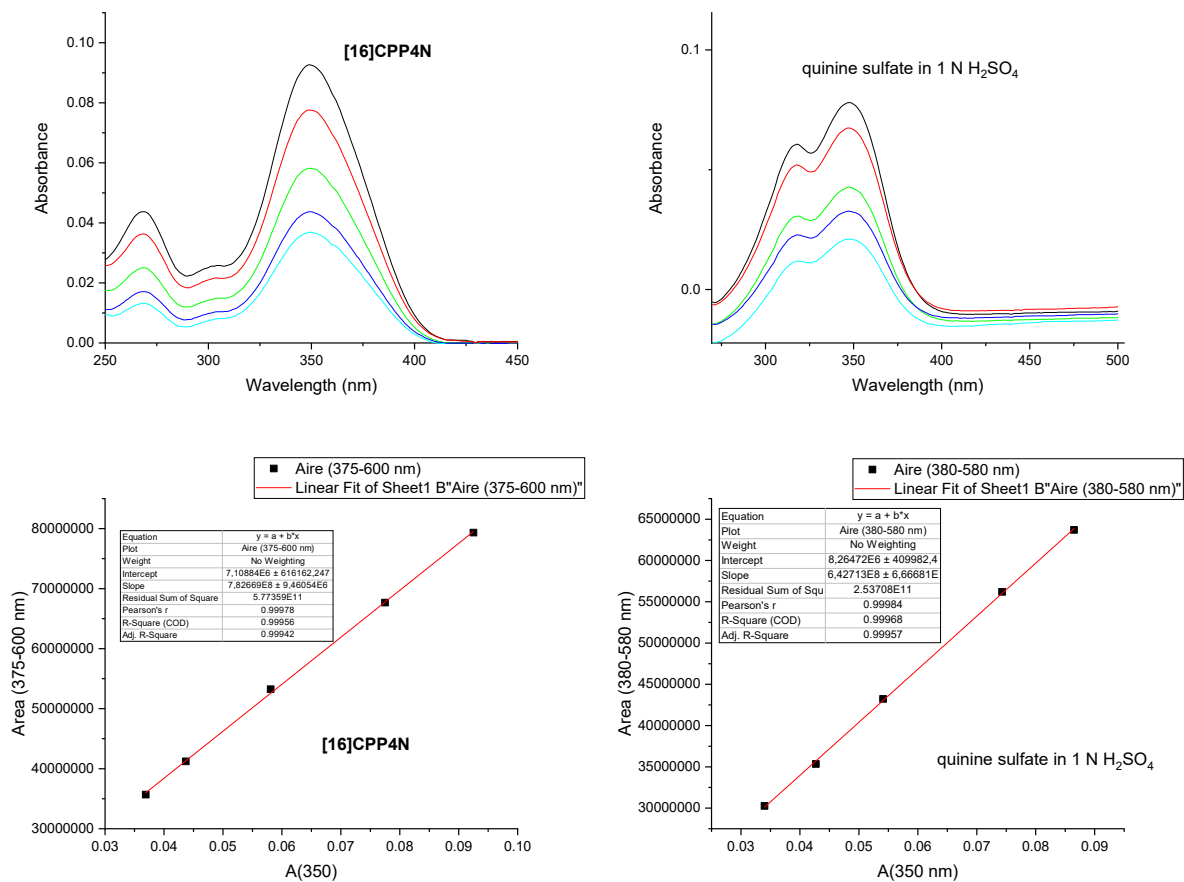

|                  | Quinine sulfate in H <sub>2</sub> SO <sub>4</sub> | [16]CPP4N |
|------------------|---------------------------------------------------|-----------|
| slope            | 6.43E+08                                          | 7.83E+08  |
| refracting index | 1.336                                             | 1.445     |
| QY               | 0.546                                             | 7.78E-01  |

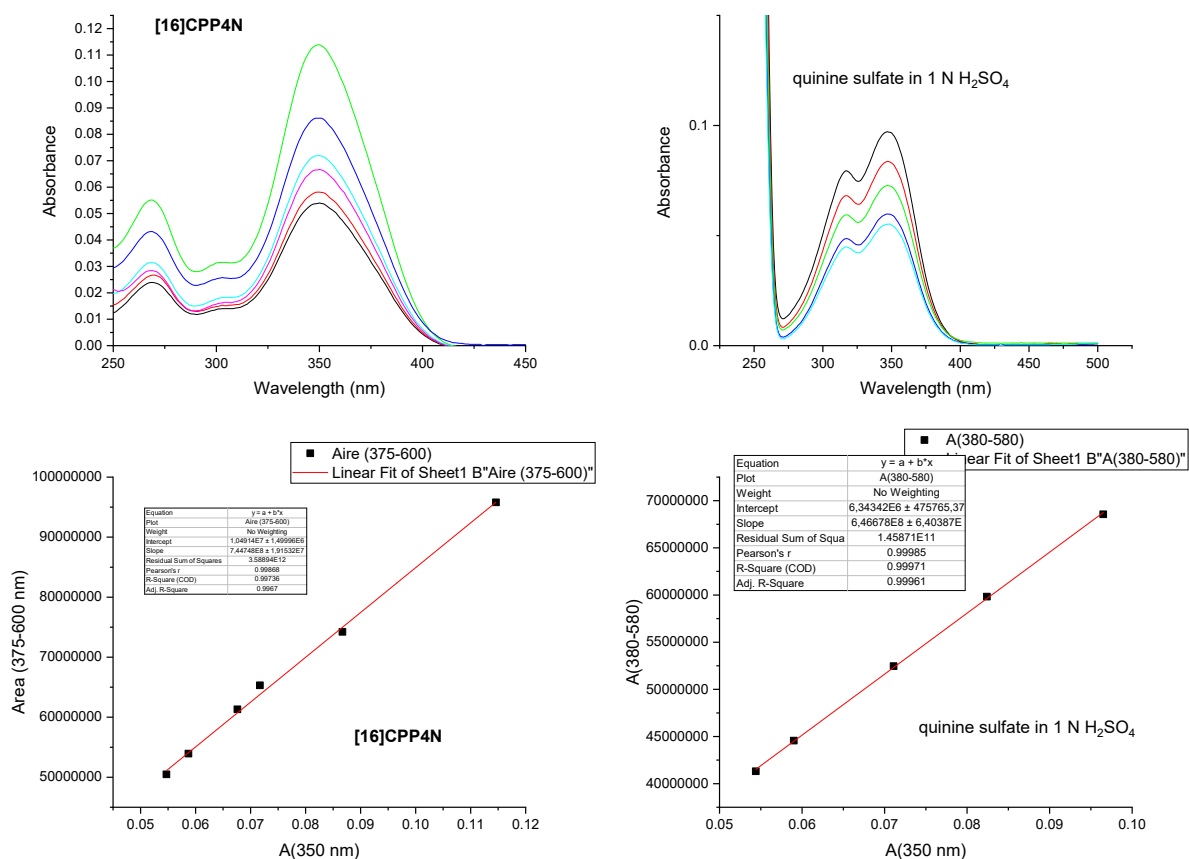

|                  | Quinine sulfate in H <sub>2</sub> SO <sub>4</sub> | [16]CPP4N |
|------------------|---------------------------------------------------|-----------|
| slope            | 6.47E+08                                          | 7.45E+08  |
| refracting index | 1.336                                             | 1.445     |
| QY               | 0.546                                             | 7.36E-01  |

Figure S 47. Determination of the quantum yield of [16]CPP4N in chloroform

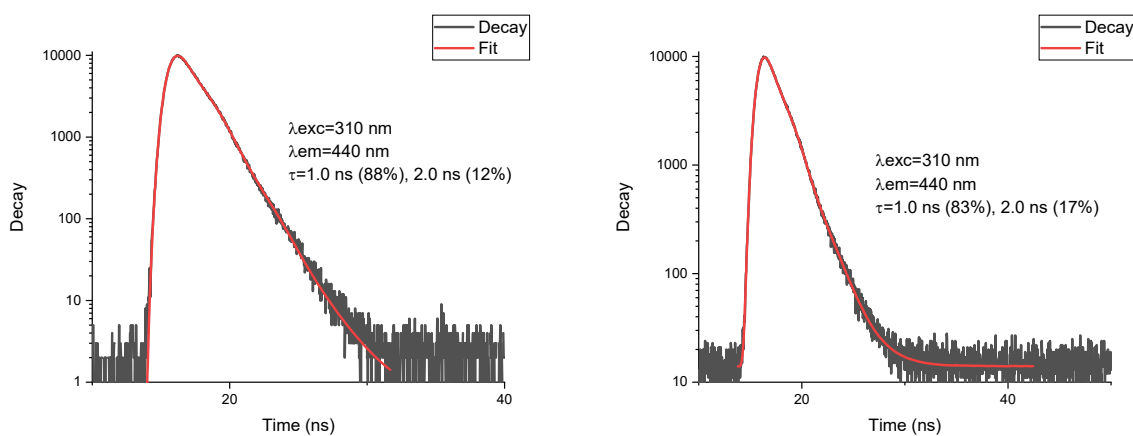

Figure S 48. Fluorescence lifetimes of [16]CPP4N in chloroform (left) and in cyclohexane (right)

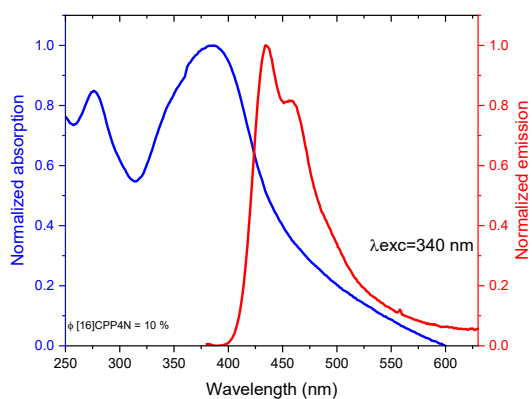

Figure S 49. Absorption and emission spectra of [16]CPP4N in thin film

### 7.3. Photophysical properties of [8]CPP4N

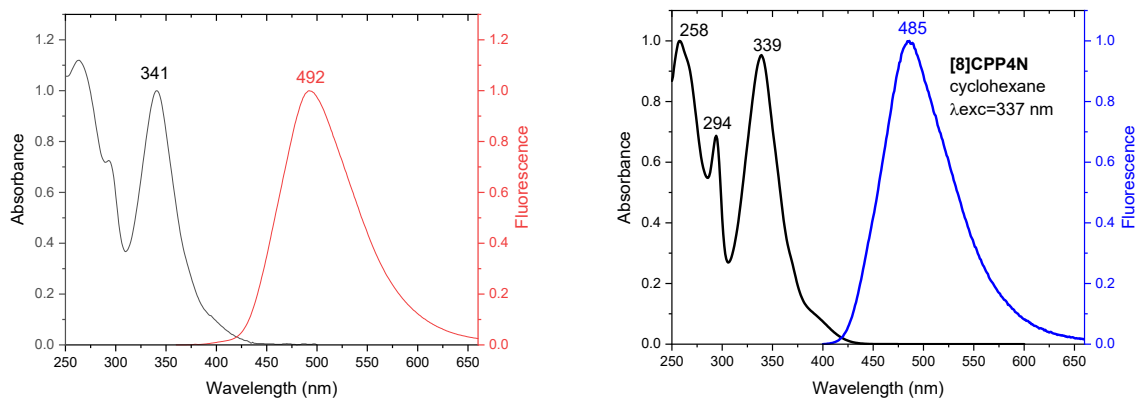

Figure S 50. Normalized absorption and fluorescence spectra of [8]CPP4N in chloroform (left) and in cyclohexane (right)

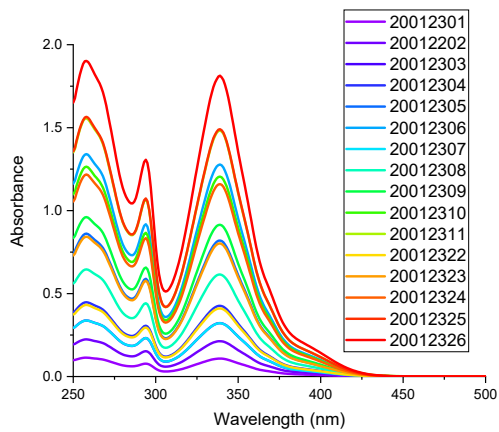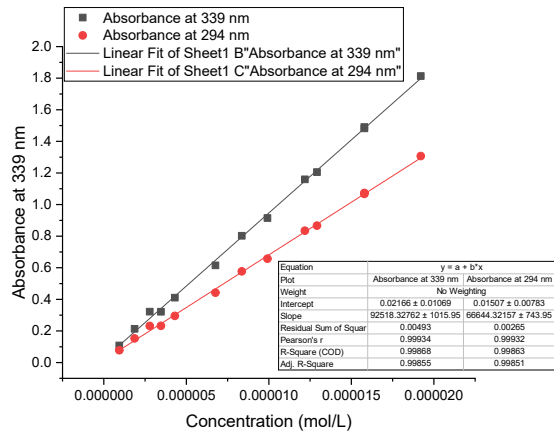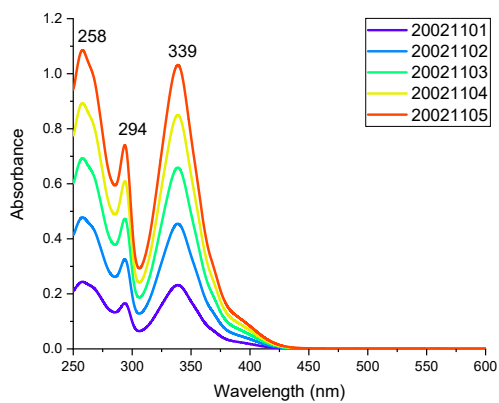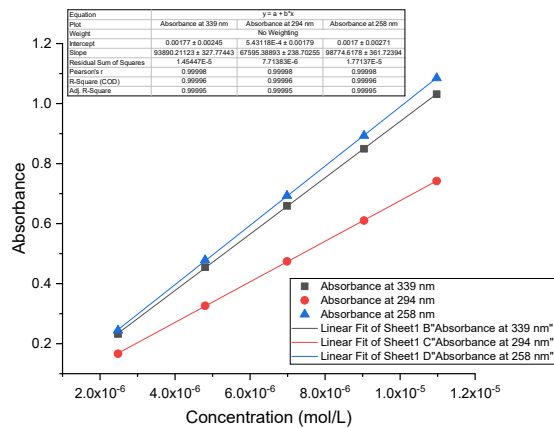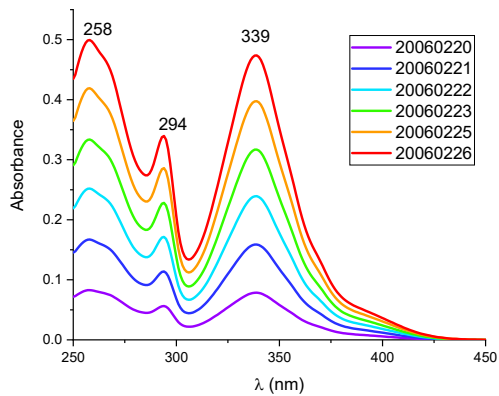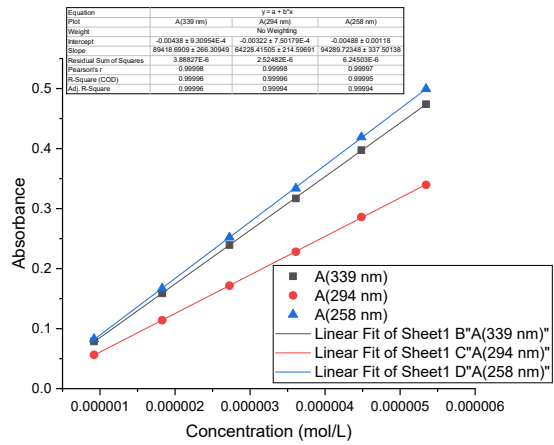

Figure S 51. Determination of the molar extinction coefficient of [8]CPP4N in cyclohexane

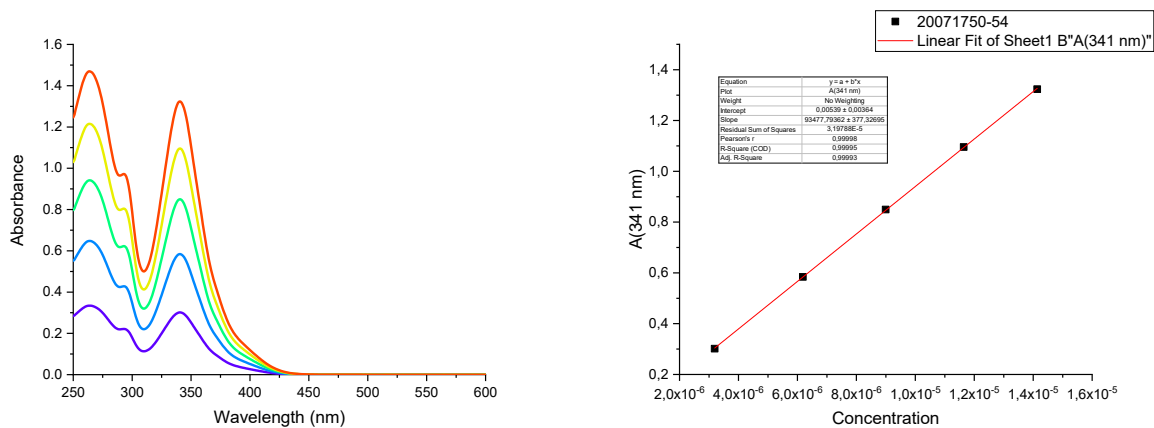

Figure S 52. Determination of the molar extinction coefficient of [8]CPP4N in chloroform

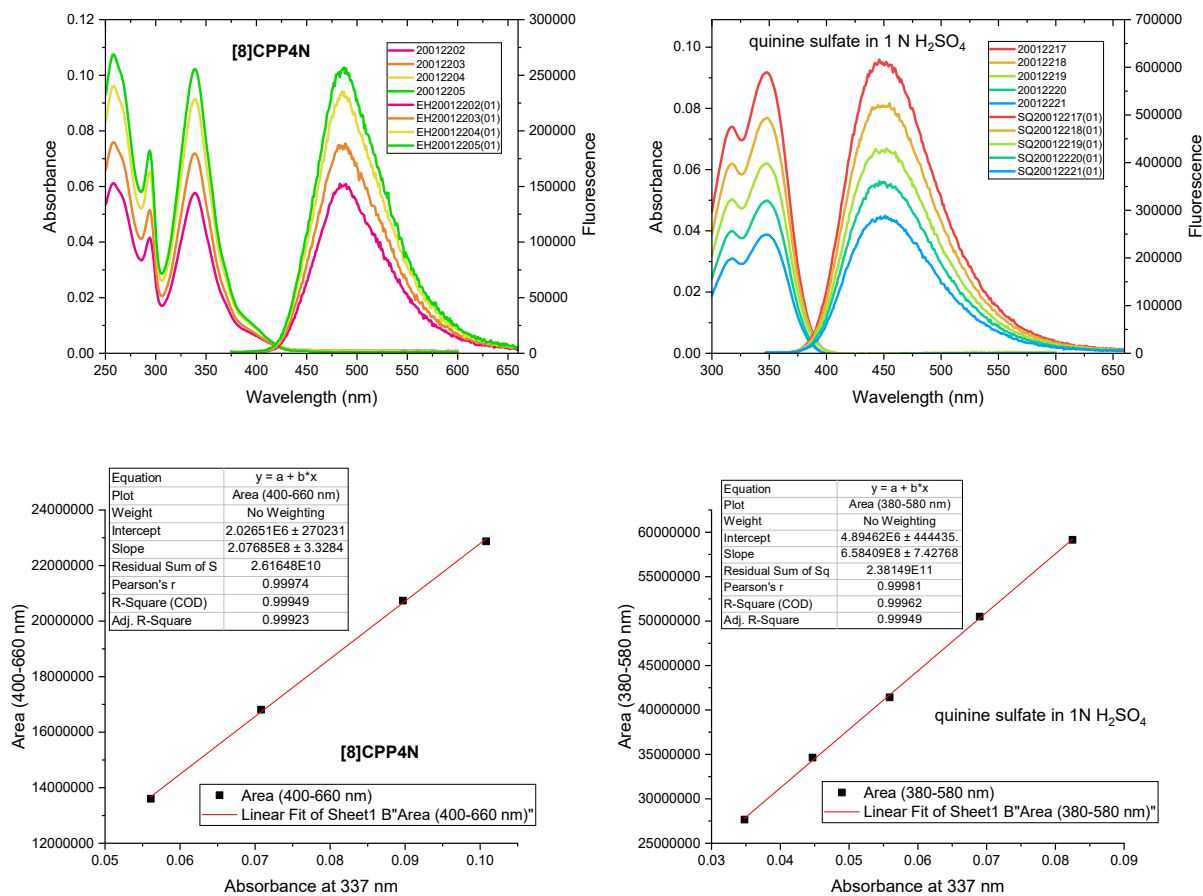

|                  | Quinine sulfate in H <sub>2</sub> SO <sub>4</sub> | [8]CPP4N |
|------------------|---------------------------------------------------|----------|
| slope            | 6.58E+08                                          | 2.08E+08 |
| refracting index | 1.336                                             | 1.42662  |
| QY               | 0.546                                             | 1.96E-01 |



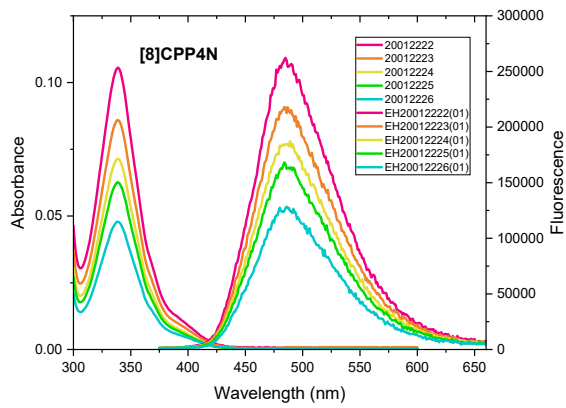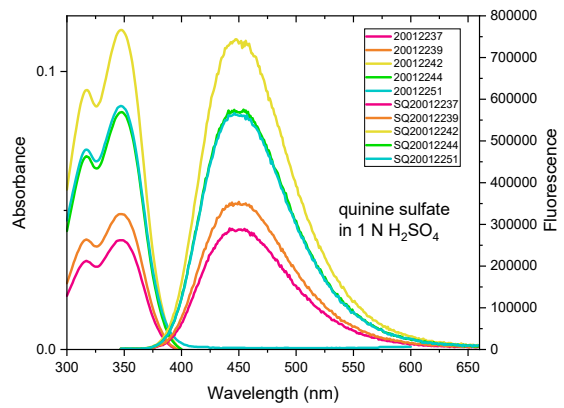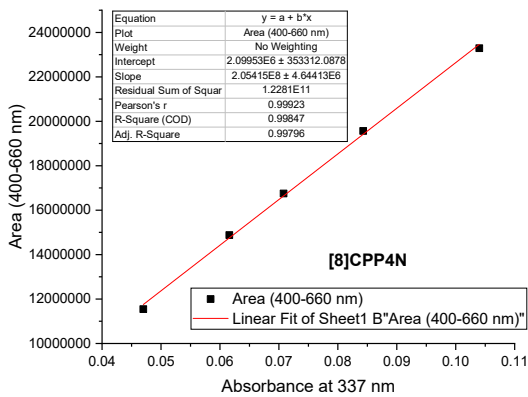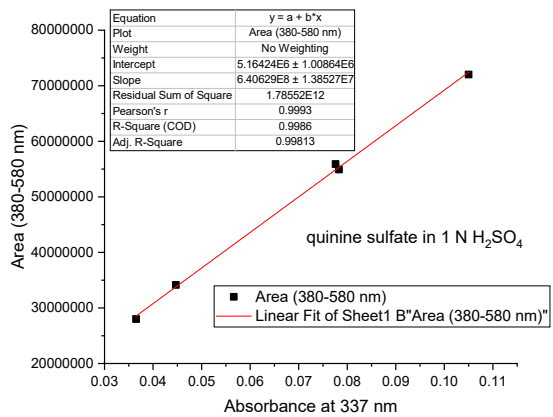

|                  | Quinine sulfate in H <sub>2</sub> SO <sub>4</sub> | [8]CPP4N |
|------------------|---------------------------------------------------|----------|
| slope            | 6.41E+08                                          | 2.05E+08 |
| refracting index | 1.336                                             | 1.42662  |
| QY               | 0.546                                             | 2.00E-01 |

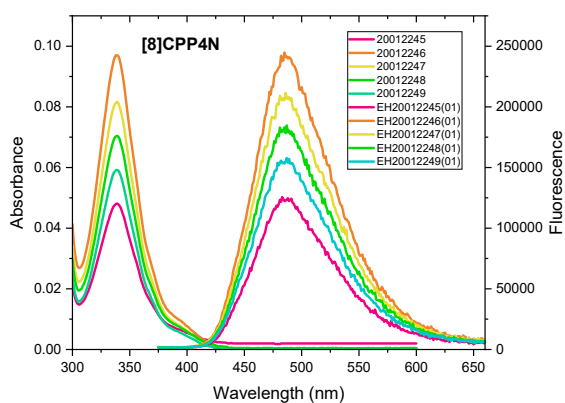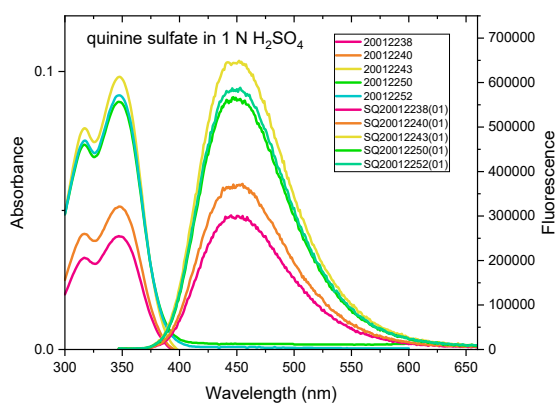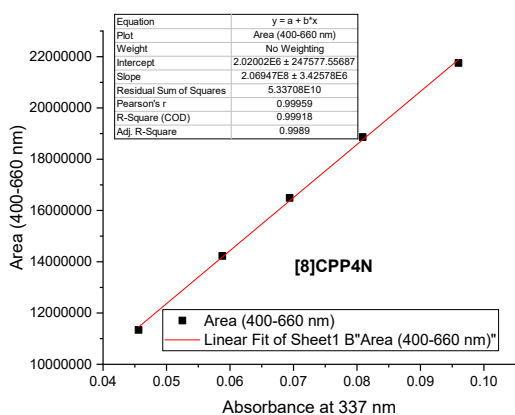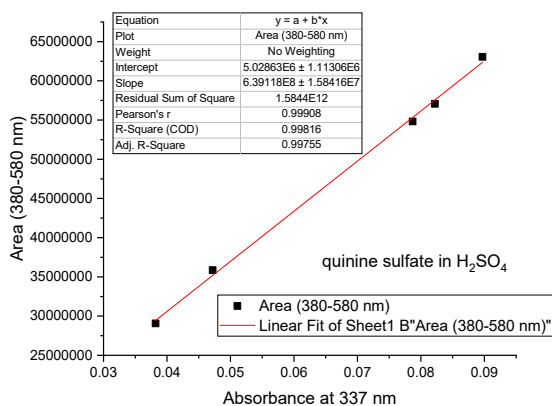

|                  | Quinine sulfate in H <sub>2</sub> SO <sub>4</sub> | [8]CPP4N |
|------------------|---------------------------------------------------|----------|
| slope            | 6.39E+08                                          | 2.07E+08 |
| refracting index | 1.336                                             | 1.42662  |
| QY               | 0.546                                             | 2.02E-01 |

Figure S 53. Determination of the quantum yield of [8]CPP4N in cyclohexane

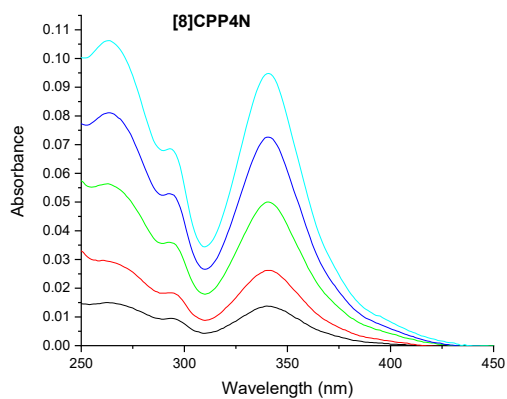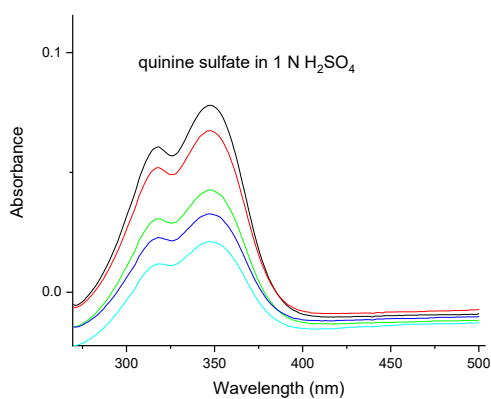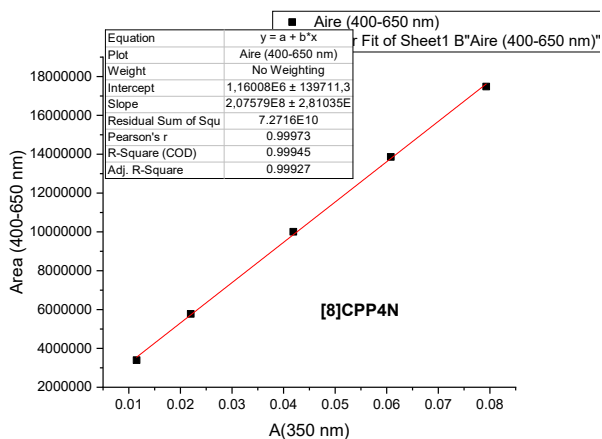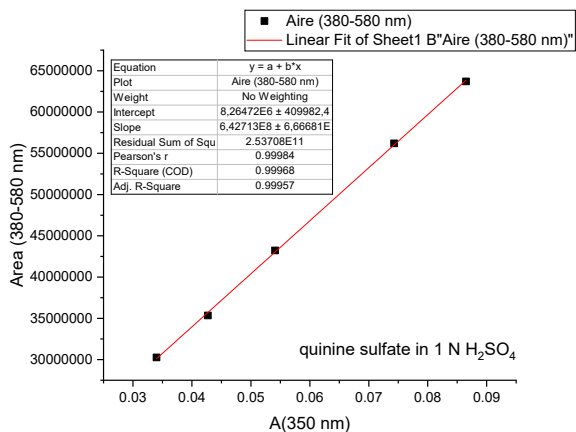

|                  | Quinine sulfate in H <sub>2</sub> SO <sub>4</sub> | [8]CPP4N |
|------------------|---------------------------------------------------|----------|
| slope            | 6.43E+08                                          | 2.08E+08 |
| refracting index | 1.336                                             | 1.445    |
| QY               | 0.546                                             | 2.06E-01 |

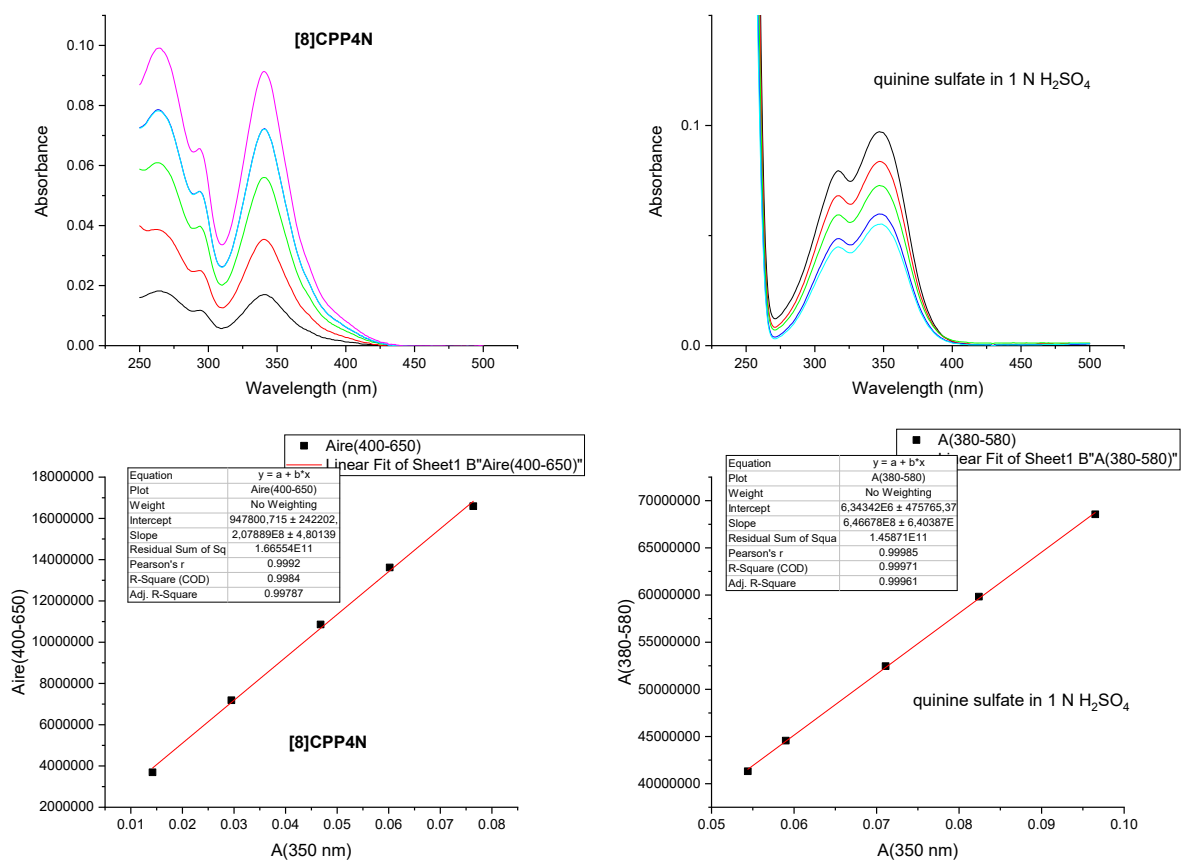

|                  | Quinine sulfate in H <sub>2</sub> SO <sub>4</sub> | [8]CPP4N |
|------------------|---------------------------------------------------|----------|
| slope            | 6.47E+08                                          | 2.08E+08 |
| refracting index | 1.336                                             | 1.445    |
| QY               | 0.546                                             | 2.05E-01 |

Figure S 54. Determination of the quantum yield of [8]CPP4N in chloroform

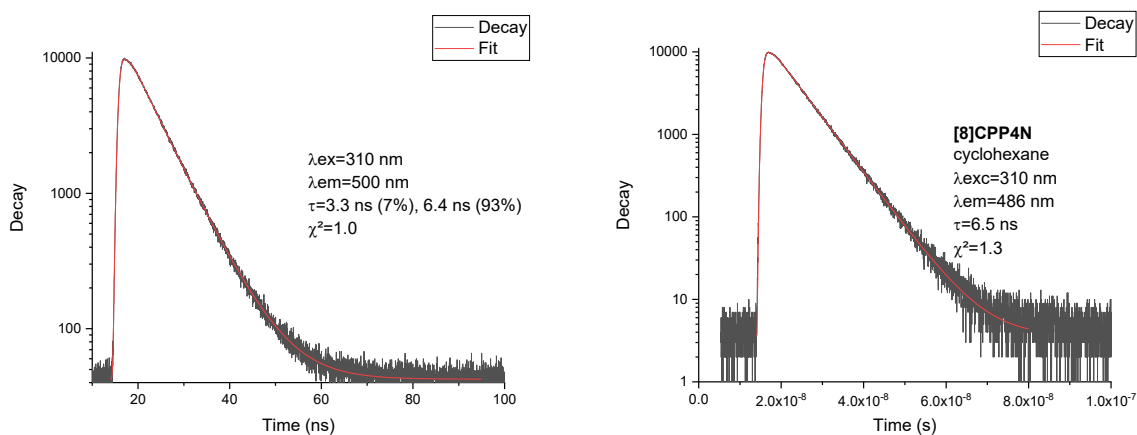

Figure S 55. Fluorescence lifetimes of [8]CPP4N in chloroform (left) and in cyclohexane (right)

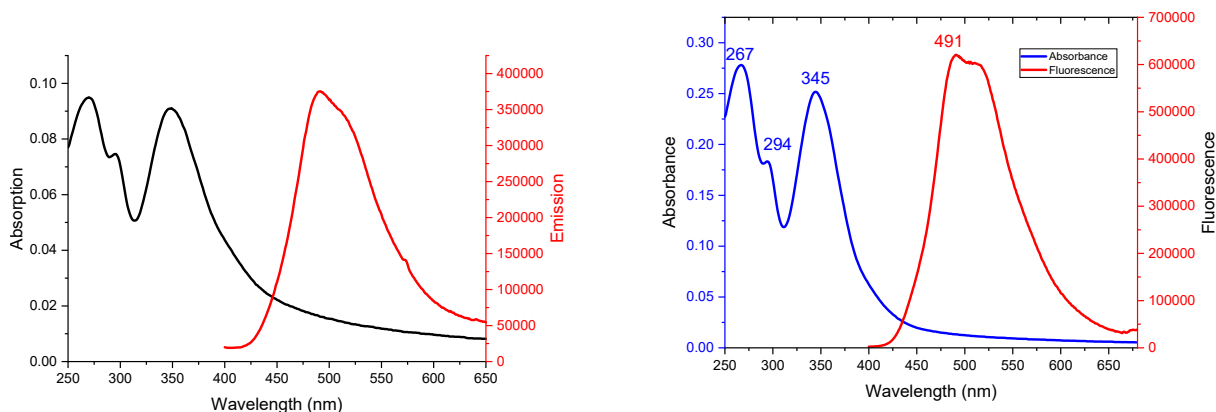

Figure S 56. Absorption and emission spectra of [8]CPP4N in thin film obtained by spin coating (left) or evaporation under vacuum (right)

#### 7.4. Solvatochromic data

Table S 1. Absorption and emission maxima in different solvents of [16]CPP4N, [12]CPP3N and [8]CPP4N

|                 | [16]CPP4N                  |                           | [12]CPP3N                  |                           | [8]CPP4N                   |                           |
|-----------------|----------------------------|---------------------------|----------------------------|---------------------------|----------------------------|---------------------------|
|                 | $\lambda_{\text{abs max}}$ | $\lambda_{\text{em max}}$ | $\lambda_{\text{abs max}}$ | $\lambda_{\text{em max}}$ | $\lambda_{\text{abs max}}$ | $\lambda_{\text{em max}}$ |
| Cyclohexane     | 344                        | 412                       | 341                        | 422                       | 339                        | 486                       |
| Toluene         | 349                        | 416                       | 347                        | 428                       | 339                        | 494                       |
| Chloroform      | 349                        | 419                       | 347                        | 432                       | 341                        | 492                       |
| Ethyl acetate   | 349                        | 416                       | 345                        | 427                       | 337                        | 482                       |
| Tetrahydrofuran | 349                        | 427                       | 345                        | 431                       | 337                        | 485                       |
| Dichloromethane | 349                        | 419                       | 346                        | 431                       | 339                        | 491                       |
| Acetonitrile    | -                          | 430                       | 348                        | 431                       | 338                        | 488                       |

## 8 Theoretical properties

The ethylhexyl chains are needed to achieve the synthesis of the hybrid nanostructures but prevent the obtention of crystals suitable for X-Ray diffraction. Thus, we modeled the geometries of the three nanostructures with theoretical calculations. In the case of the large nanostructures, the conformations of carbazole may vary. Thus, optimizations of geometry and frequency calculations have been performed on the two conformations of [12]CPP3N ( $\alpha\alpha\alpha$  and  $\alpha\beta\alpha$ ) and on the four conformations of [16]CPP4N ( $\alpha\alpha\alpha\alpha$ ,  $\alpha\beta\alpha\beta$ ,  $\alpha\alpha\beta\beta$  and  $\alpha\beta\alpha\alpha$ ). The geometric parameters of all conformers are indicated in the SI whereas the ones of the most stable conformers ( $\alpha\beta\alpha$ -[12]CPP3N and  $\alpha\beta\alpha\alpha$ -[16]CPP4N) are discussed in the article. For computing time reasons, the ethylhexyl chains were replaced by methyl groups.

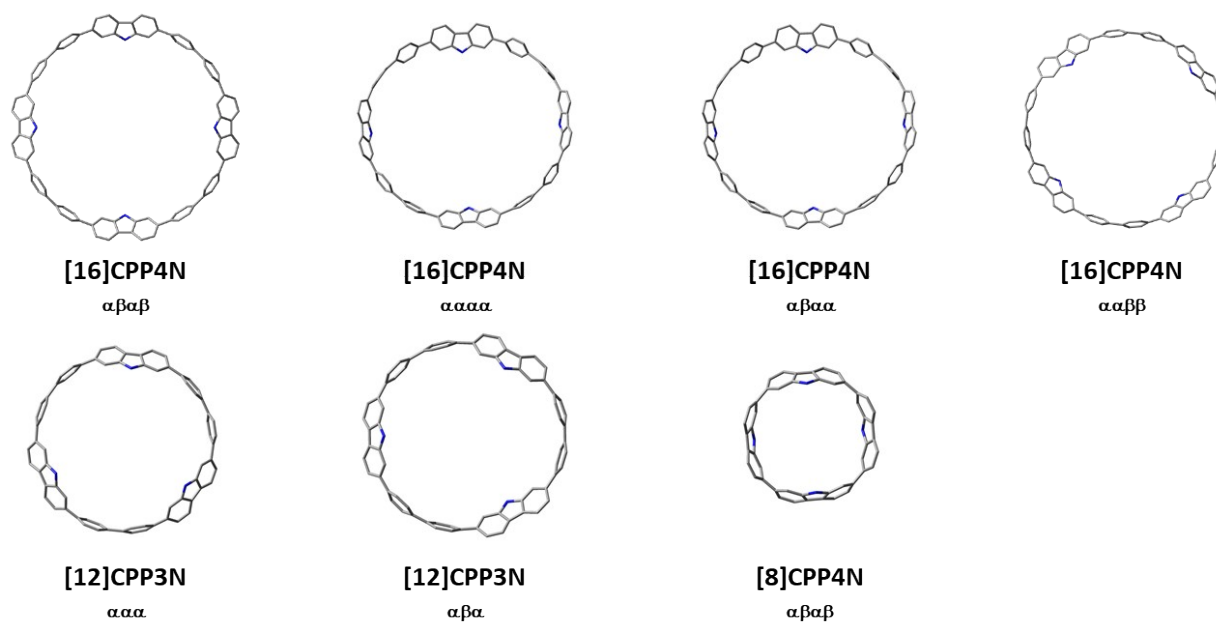

Figure S 57. Representation of the optimized geometries of the different conformers of [16]CPP4N, [12]CPP3N and [8]CPP4N (for clarity reasons, hydrogen atoms and alkyl chains are removed)

Table S 2. Angle values (definitions of torsion angle and displacement angle are respectively given in Fig. S59 and S60)

| Nanohoop               | <b>[16]CPP4N<br/>(<math>\alpha\beta\alpha\beta</math>)</b> |                    | <b>[16]CPP4N<br/>(<math>\alpha\beta\alpha\alpha</math>)</b> |                    | <b>[16]CPP4N<br/>(<math>\alpha\alpha\alpha\alpha</math>)</b> |                    | <b>[16]CPP4N (<math>\alpha\alpha\beta\beta</math>)</b> |                    |
|------------------------|------------------------------------------------------------|--------------------|-------------------------------------------------------------|--------------------|--------------------------------------------------------------|--------------------|--------------------------------------------------------|--------------------|
| Total energy (Hartree) | -4070.77732                                                |                    | -4070.77815                                                 |                    | -4070.77702                                                  |                    | -4070.77633                                            |                    |
| Nature of angle        | Torsion angle                                              | Displacement angle | Torsion angle                                               | Displacement angle | Torsion angle                                                | Displacement angle | Torsion angle                                          | Displacement angle |
| Average                | 26.7                                                       | 3.6                | 26.7                                                        | 7.4                | 27.2                                                         | 7.3                | 25.7                                                   | 7.4                |
| Value                  | 0.00                                                       | 5.09               | 30.19                                                       | 9.32               | 0                                                            | 2.86               | 0.29                                                   | 4.36               |
|                        | 0.00                                                       | 5.34               | 29.98                                                       | 9.61               | 0.01                                                         | 9.68               | 0.11                                                   | 6.15               |
|                        | 0.02                                                       | 5.37               | 36.59                                                       | 4.13               | 0.02                                                         | 9.83               | 38.65                                                  | 10.1               |
|                        | 0.03                                                       | 5.14               | 34.88                                                       | 3.91               | 0.04                                                         | 6.59               | 36.49                                                  | 10.1               |
|                        | 0.00                                                       | 2.22               | 0.27                                                        | 10.05              | 0                                                            | 6.51               | 31.78                                                  | 6.14               |
|                        | 0.00                                                       | 1.54               | 0.12                                                        | 10.47              | 0                                                            | 9.66               | 31.79                                                  | 4.36               |
|                        | 0.02                                                       | 2.23               | 38.83                                                       | 4.78               | 0.02                                                         | 9.49               | 36.49                                                  | 10.09              |
|                        | 0.03                                                       | 1.54               | 36.81                                                       | 4.77               | 0.03                                                         | 3.63               | 38.65                                                  | 9.64               |
|                        | 38.72                                                      | 5.38               | 32.37                                                       | 10.46              | 40.13                                                        | 3.63               | 0.11                                                   | 3.86               |
|                        | 36.42                                                      | 5.14               | 32.22                                                       | 10.05              | 40.33                                                        | 9.48               | 0.29                                                   | 3.99               |
|                        | 32.07                                                      | 5.33               | 36.03                                                       | 3.91               | 30.95                                                        | 9.67               | 34.19                                                  | 10.71              |
|                        | 32.10                                                      | 5.09               | 37.72                                                       | 4.13               | 31.29                                                        | 6.51               | 36.18                                                  | 10.71              |
|                        | 36.52                                                      | 2.13               | 0                                                           | 9.62               | 36.44                                                        | 6.59               | 27.14                                                  | 3.99               |
|                        | 38.89                                                      | 1.46               | 0.01                                                        | 9.33               | 38.99                                                        | 9.83               | 27.66                                                  | 3.86               |
|                        | 36.27                                                      | 2.13               | 37.72                                                       | 6.41               | 36.45                                                        | 9.69               | 43.02                                                  | 9.63               |
|                        | 38.58                                                      | 1.47               | 36.03                                                       | 6.42               | 39.01                                                        | 2.87               | 47.52                                                  | 10.1               |
|                        | 31.85                                                      | 5.02               | 32.22                                                       | 9.32               | 30.94                                                        | 2.86               | 0.93                                                   | 4.36               |
|                        | 31.88                                                      | 5.26               | 32.37                                                       | 9.61               | 31.29                                                        | 9.68               | 1.97                                                   | 6.15               |
|                        | 37.70                                                      | 5.27               | 36.8                                                        | 4.13               | 40.14                                                        | 9.83               | 29.35                                                  | 10.1               |
|                        | 35.93                                                      | 5.03               | 38.83                                                       | 3.91               | 40.35                                                        | 6.59               | 30.13                                                  | 10.1               |
|                        | 37.70                                                      | 2.40               | 0.12                                                        | 10.05              | 40.44                                                        | 6.51               | 24.16                                                  | 6.14               |
|                        | 35.93                                                      | 2.10               | 0.26                                                        | 10.47              | 40.64                                                        | 9.66               | 24.15                                                  | 4.36               |
|                        | 31.86                                                      | 2.40               | 34.88                                                       | 4.78               | 30.99                                                        | 9.49               | 30.15                                                  | 10.09              |
|                        | 31.89                                                      | 2.10               | 36.59                                                       | 4.77               | 30.66                                                        | 3.63               | 29.37                                                  | 9.64               |
|                        | 36.27                                                      | 5.26               | 29.98                                                       | 10.46              | 37.82                                                        | 3.63               | 1.99                                                   | 3.86               |
|                        | 38.56                                                      | 5.03               | 30.18                                                       | 10.05              | 35.88                                                        | 9.48               | 0.92                                                   | 3.99               |
|                        | 36.51                                                      | 5.27               | 40.76                                                       | 3.91               | 37.82                                                        | 9.67               | 47.5                                                   | 10.71              |
|                        | 38.87                                                      | 5.01               | 40.83                                                       | 4.13               | 35.86                                                        | 6.51               | 46.02                                                  | 10.71              |
| 32.06                  | 2.13                                                       | 0                  | 9.62                                                        | 30.99              | 6.59                                                         | 27.64              | 3.99                                                   |                    |
| 32.10                  | 1.47                                                       | 0                  | 9.33                                                        | 30.67              | 9.83                                                         | 27.12              | 3.86                                                   |                    |
| 36.40                  | 1.46                                                       | 40.76              | 6.41                                                        | 40.63              | 9.69                                                         | 36.18              | 9.63                                                   |                    |
| 38.72                  | 2.13                                                       | 40.84              | 6.42                                                        | 40.44              | 2.87                                                         | 34.19              | 10.1                                                   |                    |

| Nanohoop               | <b>[12]CPP3N (<math>\alpha\beta\alpha</math>)</b> |                    | <b>[12]CPP3N (<math>\alpha\alpha\alpha</math>)</b> |                    | <b>[8]CPP4N</b> |                    |
|------------------------|---------------------------------------------------|--------------------|----------------------------------------------------|--------------------|-----------------|--------------------|
| Total energy (Hartree) | -3053.04493                                       |                    | -3053.04469                                        |                    | -2222.24976     |                    |
| Nature of angle        | Torsion angle                                     | Displacement angle | Torsion angle                                      | Displacement angle | Torsion angle   | Displacement angle |
| Average                | 23.1                                              | 10.8               | 24.6                                               | 5.3                | 21.2            | 7.4                |
| Value                  | 27.67                                             | 14.78              | 0.87                                               | 7.20               | 0.04            | 8.24               |
|                        | 27.04                                             | 9.3                | 1.9                                                | 7.29               | 0.2             | 8.18               |
|                        | 20.56                                             | 6.8                | 0.86                                               | 7.03               | 0.52            | 8.26               |
|                        | 20.31                                             | 13.46              | 1.89                                               | 7.12               | 0.21            | 8.23               |
|                        | 35.43                                             | 13.98              | 0.91                                               | 6.44               | 0.04            | 6.46               |
|                        | 33.23                                             | 6.2                | 2.01                                               | 6.76               | 0.76            | 6.54               |

|       |       |       |      |       |      |
|-------|-------|-------|------|-------|------|
| 0.14  | 6.85  | 29.1  | 6.65 | 0.23  | 6.73 |
| 0.11  | 15.47 | 30.04 | 6.53 | 0.62  | 6.69 |
| 34.09 | 15.42 | 20.26 | 3.83 | 42.24 | 8.03 |
| 32.04 | 6.8   | 20.22 | 3.07 | 41.93 | 6.51 |
| 21.11 | 6.2   | 47.61 | 3.73 | 41.73 | 8.22 |
| 21.12 | 14.17 | 46.41 | 2.93 | 42.22 | 6.68 |
| 31.99 | 14.78 | 29.46 | 4.21 | 42.42 | 8.26 |
| 34.01 | 9.3   | 30.48 | 4.05 | 42.06 | 6.48 |
| 0.12  | 6.8   | 20.81 | 4.06 | 41.76 | 8.07 |
| 0.18  | 13.46 | 20.89 | 4.15 | 42.36 | 6.62 |
| 33.53 | 13.98 | 46.06 | 7.04 |       |      |
| 35.69 | 6.2   | 47.14 | 7.20 |       |      |
| 22.64 | 6.85  | 29.09 | 6.77 |       |      |
| 22.92 | 15.47 | 30.00 | 6.56 |       |      |
| 47.4  | 15.42 | 20.66 | 3.87 |       |      |
| 48.81 | 6.8   | 20.7  | 4.16 |       |      |
| 1.12  | 6.2   | 46.07 | 3.08 |       |      |
| 2.36  | 14.17 | 47.07 | 4.18 |       |      |

### Torsion angle

Definition of a torsion angle: The external torsion angle ( $\theta_{\text{ext}}$ ) is the dihedral angle between two unbridged phenylenes. Two angles are measured for each C-C bound (C1-C2-C3-C4 and C5-C2-C3-C6). The internal torsion angle ( $\theta_{\text{int}}$ ) is the dihedral angle between two bridged phenylenes. Two angles are measured for each C-C bound (Ca-Cb-Cc-Cd and Ce-Cb-Cc-Cf).

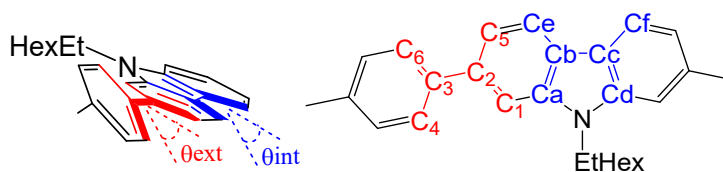

Figure S 58. Definition of a torsion angle  $\theta$

### Displacement angle

Definition of a displacement angle: The mean planes passing by C1-Ca-Ce-C5 (red), C1-C2-C5 (yellow) and Ca-Cb-Ce (green) are drawn. The displacement angles ( $\omega$ ) are measured for the phenylene labelled C1-C2-C5-Ce-Cb-Ca between red and yellow planes on the one hand and between red and green planes on the other hand (whatever this phenylene is substituted by a nitrogen atom or not).



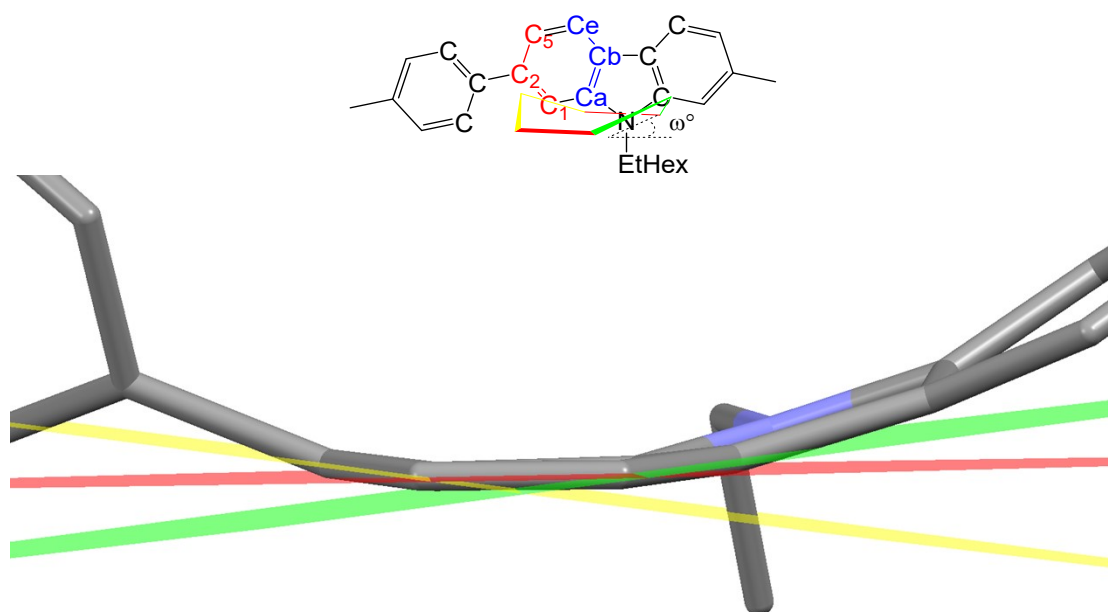

Figure S59 Measurement of a displacement angle  $\omega$

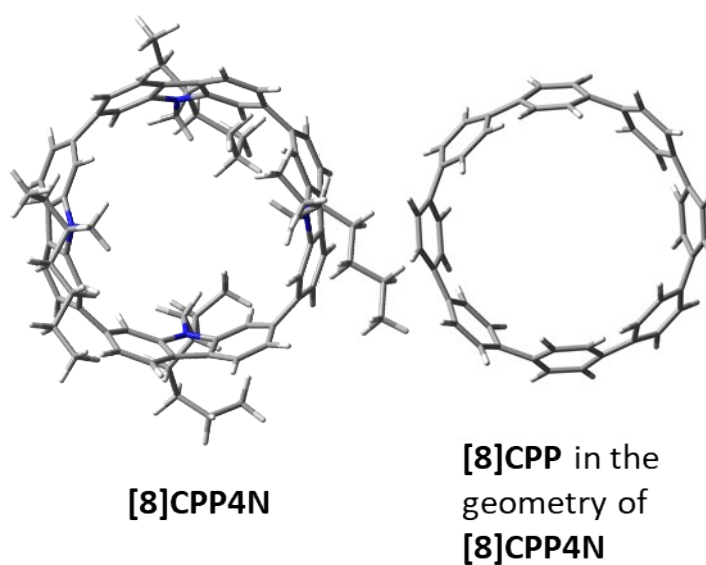

Figure S 60. Optimized geometry of **[8]CPP4N** and structure of **[8]CPP** in the geometry optimized for **[8]CPP4N** (all the torsion angles and displacement angles have been frozen; each nitrogen bridge has been replaced by two hydrogen atoms with standard structure properties)

Table S 3. Calculated energy levels of the frontier orbitals of [16]CPP4N, [12]CPP3N, [8]CPP4N and [8]CPP

| conformation | [16]CPP4N                 |                            |                          |                          | [12]CPP3N           |                      | [8]CPP4N                 |                  | [8]CPP           |
|--------------|---------------------------|----------------------------|--------------------------|--------------------------|---------------------|----------------------|--------------------------|------------------|------------------|
|              | $\alpha\beta\alpha\alpha$ | $\alpha\alpha\alpha\alpha$ | $\alpha\beta\alpha\beta$ | $\alpha\beta\alpha\beta$ | $\alpha\beta\alpha$ | $\alpha\alpha\alpha$ | $\alpha\beta\alpha\beta$ |                  | of<br>[8]CPP4N   |
| Basis set    | 6-<br>31g(d)              | 6-<br>31g(d)               | 6-<br>31g(d)             | 6-<br>31g(d)             | 6-<br>31g(d)        | 6-<br>31g(d)         | 6-<br>31g(d)             | 6-<br>311+g(d,p) | 6-<br>311+g(d,p) |
| Alkyl chain  | methyl                    | methyl                     | methyl                   | methyl                   | methyl              | methyl               | methyl                   | 2-ethex          | -                |
| LUMO (eV)    | -1.55                     | -1.53                      | -1.55                    | -1.36                    | -1.63               | -1.58                | -1.36                    | -1.76            | -2.27            |
| HOMO(eV)     | -5.12                     | -5.13                      | -5.12                    | -4.89                    | -5.04               | -5.07                | -4.89                    | -5.16            | -5.23            |

Table S 4. Atomic coordinates of  $\alpha\beta\alpha\beta$ -[16]CPP4N after geometry optimization (b3lyp/6-31g(d), methyl chains have been used instead of ethylhexyl chains,  $E=-4070.77732$  Hartree)

| Atoms | X (Å)     | Y (Å)     | Z (Å)     |
|-------|-----------|-----------|-----------|
| C     | 8.283604  | -7.193827 | -0.063462 |
| C     | 8.40681   | -6.501065 | -1.281184 |
| C     | 9.171726  | -5.344947 | -1.380423 |
| C     | 9.843021  | -4.814437 | -0.264953 |
| C     | 9.821859  | -5.573979 | 0.917735  |
| C     | 9.062834  | -6.737522 | 1.014647  |
| C     | 10.390428 | -3.434487 | -0.28735  |
| C     | 9.663855  | -2.452814 | -0.976969 |
| C     | 10.05083  | -1.120649 | -0.864468 |
| C     | 11.157758 | -0.719826 | -0.068443 |
| C     | 11.910192 | -1.714503 | 0.571372  |
| C     | 11.527081 | -3.04891  | 0.462121  |
| C     | 9.838315  | 4.823823  | -0.26483  |
| C     | 9.166479  | 5.353649  | -1.380298 |
| C     | 8.400449  | 6.509032  | -1.281078 |
| C     | 8.276592  | 7.201707  | -0.063374 |
| C     | 9.056264  | 6.746171  | 1.014741  |
| H     | 7.833083  | -6.827155 | -2.143744 |
| H     | 9.211893  | -4.816037 | -2.328676 |
| H     | 10.344064 | -5.207641 | 1.797307  |
| H     | 9.039255  | -7.273969 | 1.959309  |
| H     | 8.758395  | -2.724605 | -1.50848  |
| H     | 12.775267 | -1.448169 | 1.173263  |
| H     | 12.108798 | -3.812724 | 0.970028  |
| H     | 9.207136  | 4.824748  | -2.328536 |
| H     | 9.032177  | 7.282614  | 1.959392  |
| C     | 9.816415  | 5.583361  | 0.917847  |
| C     | 10.387044 | 3.444401  | -0.287211 |
| C     | 11.524078 | 3.059917  | 0.462245  |
| C     | 9.661453  | 2.462047  | -0.976892 |
| C     | 11.908495 | 1.725882  | 0.571451  |
| H     | 12.105056 | 3.824285  | 0.970163  |
| C     | 10.049731 | 1.130258  | -0.864431 |
| H     | 8.755743  | 2.732975  | -1.508421 |
| C     | 11.157042 | 0.730491  | -0.068409 |
| H     | 12.773833 | 1.460375  | 1.173329  |

---

|   |            |           |           |
|---|------------|-----------|-----------|
| N | 9.424624   | 0.004507  | -1.382907 |
| C | 8.204602   | 0.003926  | -2.159714 |
| H | 8.181451   | -0.879535 | -2.802992 |
| H | 7.307215   | 0.003482  | -1.525823 |
| H | 8.180595   | 0.88738   | -2.802969 |
| C | -8.299569  | 7.216381  | -0.081069 |
| C | -9.086221  | 6.764848  | 0.993624  |
| C | -9.836892  | 5.595511  | 0.899768  |
| C | -9.840736  | 4.82525   | -0.27607  |
| C | -9.164143  | 5.35113   | -1.390466 |
| C | -8.408279  | 6.51346   | -1.29435  |
| C | -10.371724 | 3.438631  | -0.288322 |
| C | -11.520747 | 3.049883  | 0.440278  |
| C | -11.895558 | 1.713323  | 0.550143  |
| C | -11.119468 | 0.719582  | -0.062694 |
| C | -9.98828   | 1.121404  | -0.823604 |
| C | -9.620206  | 2.457704  | -0.951027 |
| C | -9.831447  | -5.604904 | 0.899626  |
| C | -9.07965   | -6.773517 | 0.9935    |
| C | -8.292561  | -7.224304 | -0.081185 |
| C | -8.401964  | -6.521517 | -1.294484 |
| C | -9.158958  | -5.359924 | -1.390621 |
| H | -9.074165  | 7.309282  | 1.93395   |
| H | -10.364822 | 5.232848  | 1.777497  |
| H | -9.191974  | 4.813559  | -2.334323 |
| H | -7.828962  | 6.836227  | -2.154433 |
| H | -12.121958 | 3.813385  | 0.925508  |
| H | -8.718023  | 2.738313  | -1.483493 |
| H | -10.359731 | -5.242741 | 1.777348  |
| H | -9.06706   | -7.317921 | 1.933835  |
| H | -7.822348  | -6.843744 | -2.154567 |
| H | -9.187334  | -4.822414 | -2.334494 |
| C | -9.83603   | -4.834662 | -0.276222 |
| C | -10.368393 | -3.448566 | -0.288495 |
| C | -9.617803  | -2.466872 | -0.951118 |
| C | -11.517789 | -3.060958 | 0.440126  |
| C | -9.98718   | -1.130937 | -0.823646 |
| H | -8.715328  | -2.746575 | -1.483565 |
| C | -11.893898 | -1.724767 | 0.55005   |
| H | -12.118248 | -3.82506  | 0.925342  |
| C | -11.118769 | -0.730246 | -0.062735 |
| H | 7.826395   | 6.834543  | -2.143639 |
| C | -7.243311  | -8.261421 | 0.081556  |
| C | -6.532948  | -8.355731 | 1.291711  |
| C | -6.79012   | -9.050609 | -0.990576 |
| C | -5.363615  | -9.100746 | 1.386691  |
| H | -6.856342  | -7.773651 | 2.149673  |
| C | -5.613832  | -9.790613 | -0.897855 |
| H | -7.339409  | -9.049317 | -1.928159 |
| C | -4.837885  | -9.780503 | 0.274177  |

---

---

|   |           |            |           |
|---|-----------|------------|-----------|
| H | -5.251144 | -10.32138  | -1.773878 |
| C | -6.540994 | 8.3495     | 1.291764  |
| C | -5.372374 | 9.09564    | 1.386693  |
| C | -7.251329 | 8.254519   | 0.081644  |
| C | -4.847353 | 9.775915   | 0.274161  |
| H | -4.829715 | 9.113276   | 2.327872  |
| C | -6.798935 | 9.044134   | -0.990508 |
| C | -5.623356 | 9.785271   | -0.897838 |
| H | -7.348256 | 9.042306   | -1.928073 |
| H | -5.261213 | 10.316379  | -1.773881 |
| C | 7.223703  | 8.235266   | 0.09795   |
| C | 6.506337  | 8.323802   | 1.304406  |
| C | 6.776697  | 9.029808   | -0.972841 |
| C | 5.337672  | 9.070136   | 1.396925  |
| H | 6.824329  | 7.737255   | 2.161328  |
| C | 5.600848  | 9.770758   | -0.882788 |
| H | 7.331183  | 9.033001   | -1.907335 |
| C | 4.819036  | 9.756842   | 0.285313  |
| H | 4.790553  | 9.083733   | 2.33557   |
| H | 5.243709  | 10.306331  | -1.758148 |
| C | 7.231703  | -8.228391  | 0.097881  |
| C | 6.78539   | -9.023317  | -0.972913 |
| C | 6.514493  | -8.317653  | 1.304375  |
| C | 5.610247  | -9.765382  | -0.88282  |
| H | 7.339825  | -9.025947  | -1.907441 |
| C | 5.346542  | -9.065097  | 1.396936  |
| H | 6.831983  | -7.73084   | 2.161302  |
| C | 4.828488  | -9.752249  | 0.285327  |
| H | 5.253563  | -10.30126  | -1.758179 |
| H | 4.799496  | -9.079252  | 2.335613  |
| C | 3.441025  | -10.280983 | 0.292588  |
| C | 2.456098  | -9.523354  | 0.94229   |
| C | 3.056878  | -11.437924 | -0.425869 |
| C | 1.120983  | -9.895375  | 0.814007  |
| H | 2.733096  | -8.615408  | 1.466791  |
| C | 1.72138   | -11.816083 | -0.537113 |
| H | 3.82329   | -12.043427 | -0.901053 |
| C | 0.724047  | -11.035773 | 0.06435   |
| H | 1.456468  | -12.70364  | -1.105993 |
| C | 3.431072  | 10.284258  | 0.292507  |
| C | 3.04583   | 11.440742  | -0.426097 |
| C | 2.44687   | 9.52578    | 0.942315  |
| C | 1.709972  | 11.817615  | -0.537391 |
| H | 3.811666  | 12.046911  | -0.901359 |
| C | 1.111401  | 9.896511   | 0.81398   |
| H | 2.724735  | 8.618169   | 1.466937  |
| C | 0.713382  | 11.036431  | 0.064168  |
| H | 1.444217  | 12.704845  | -1.106387 |
| C | -3.457702 | 10.298912  | 0.284733  |
| C | -2.478297 | 9.536731   | 0.937448  |

---

|   |            |            |           |
|---|------------|------------|-----------|
| C | -3.066027  | 11.453235  | -0.433775 |
| C | -1.140948  | 9.901504   | 0.811742  |
| H | -2.761435  | 8.63068    | 1.461968  |
| C | -1.728323  | 11.824583  | -0.541816 |
| H | -3.828234  | 12.061986  | -0.911593 |
| C | -0.736446  | 11.039526  | 0.062527  |
| H | -1.45746   | 12.710367  | -1.110659 |
| C | -3.447737  | -10.302178 | 0.284817  |
| C | -2.469051  | -9.538972  | 0.937415  |
| C | -3.054967  | -11.456223 | -0.433538 |
| C | -1.131358  | -9.902497  | 0.811761  |
| H | -2.753046  | -8.633118  | 1.461809  |
| C | -1.716912  | -11.826325 | -0.541522 |
| H | -3.816596  | -12.065759 | -0.911277 |
| C | -0.725778  | -11.040248 | 0.062716  |
| H | -1.445209  | -12.711927 | -1.110245 |
| H | -4.82099   | -9.117875  | 2.327899  |
| H | -6.863778  | 7.767094   | 2.149735  |
| H | 10.338975  | 5.217543   | 1.797424  |
| H | -12.774985 | -1.456967  | 1.127572  |
| H | -12.776387 | 1.444643   | 1.127651  |
| N | -0.016714  | 9.229221   | 1.271266  |
| N | -9.323361  | -0.004434  | -1.289929 |
| N | -0.007762  | -9.229107  | 1.271222  |
| C | -0.020185  | 8.018296   | 2.062813  |
| H | -0.904305  | 7.42265    | 1.821066  |
| H | 0.86143    | 7.418414   | 1.822382  |
| H | -0.020485  | 8.228199   | 3.140504  |
| C | -8.119826  | -0.003826  | -2.092697 |
| H | -7.519405  | -0.886432  | -1.857311 |
| H | -8.339805  | -0.003848  | -3.168359 |
| H | -7.520205  | 0.87929    | -1.857183 |
| C | -0.012372  | -8.018111  | 2.062653  |
| H | 0.868648   | -7.417394  | 1.822118  |
| H | -0.897084  | -7.423351  | 1.820892  |
| H | -0.012413  | -8.227906  | 3.140365  |

No imaginary frequency

Table S 5. Atomic coordinates of  $\alpha\alpha\beta\beta$ -[16]CPP4N after geometry optimization (b3lyp/6-31g(d), methyl chains have been used instead of ethylhexyl chains,  $E=-4070.77633$  Hartree)

| Atoms | X (Å)     | Y (Å)     | Z (Å)     |
|-------|-----------|-----------|-----------|
| C     | -0.671222 | 10.85731  | 0.057251  |
| C     | -1.545043 | 11.143326 | -1.007224 |
| C     | -2.902665 | 10.839252 | -0.93363  |
| C     | -3.456391 | 10.245415 | 0.213882  |
| C     | -2.606627 | 10.081406 | 1.321793  |
| C     | -1.250477 | 10.369227 | 1.242603  |
| C     | -4.822146 | 9.663795  | 0.214686  |
| C     | -5.013902 | 8.441939  | 0.876248  |
| C     | -6.242427 | 7.798097  | 0.768043  |

---

|   |            |            |           |
|---|------------|------------|-----------|
| C | -7.310938  | 8.331364   | -0.00239  |
| C | -7.12432   | 9.574791   | -0.622319 |
| C | -5.897894  | 10.225934  | -0.512919 |
| C | -10.423979 | 3.557087   | 0.243001  |
| C | -10.977256 | 3.006947   | -0.926143 |
| C | -11.29207  | 1.652529   | -1.00655  |
| C | -11.063142 | 0.783483   | 0.075285  |
| C | -10.633281 | 1.362847   | 1.282512  |
| H | -1.152798  | 11.570824  | -1.925785 |
| H | -3.528075  | 10.999846  | -1.807499 |
| H | -3.008253  | 9.680638   | 2.248168  |
| H | -0.619116  | 10.142682  | 2.096191  |
| H | -4.184172  | 7.968225   | 1.38905   |
| H | -7.924081  | 10.02422   | -1.205366 |
| H | -5.76152   | 11.187041  | -1.000152 |
| H | -11.087808 | 3.630134   | -1.809391 |
| H | -10.457779 | 0.730644   | 2.147942  |
| C | -10.327493 | 2.715855   | 1.365225  |
| C | -9.797312  | 4.903073   | 0.245421  |
| C | -10.314921 | 5.995532   | -0.489805 |
| C | -8.568153  | 5.04687    | 0.905131  |
| C | -9.612455  | 7.192466   | -0.608765 |
| H | -11.280656 | 5.894498   | -0.97668  |
| C | -7.869811  | 6.244005   | 0.781792  |
| H | -8.131627  | 4.200345   | 1.42378   |
| C | -8.359465  | 7.328854   | 0.005102  |
| H | -10.028285 | 8.006606   | -1.19683  |
| N | -6.612614  | 6.561082   | 1.276475  |
| C | -5.757147  | 5.672255   | 2.031413  |
| H | -5.093197  | 6.259721   | 2.670942  |
| H | -5.146047  | 5.030942   | 1.381613  |
| C | 0.716798   | -10.896319 | 0.084916  |
| C | 1.325419   | -10.649017 | 1.328628  |
| C | 2.693033   | -10.410823 | 1.432678  |
| C | 3.513663   | -10.389045 | 0.293425  |
| C | 2.92898    | -10.750146 | -0.9322   |
| C | 1.565956   | -11.009452 | -1.03164  |
| C | 4.883255   | -9.817565  | 0.365068  |
| C | 5.793687   | -10.147342 | 1.395185  |
| C | 6.991622   | -9.455285  | 1.5544    |
| C | 7.298664   | -8.393238  | 0.693128  |
| C | 6.396994   | -8.095104  | -0.364411 |
| C | 5.209415   | -8.800765  | -0.543247 |
| C | 10.751406  | -2.890496  | 1.238799  |
| C | 11.041663  | -1.530408  | 1.188656  |
| C | 10.877201  | -0.78658   | 0.005807  |
| C | 10.539665  | -1.509603  | -1.153186 |
| C | 10.273261  | -2.872438  | -1.10804  |
| H | 0.709291   | -10.546224 | 2.216894  |
| H | 3.114213   | -10.13778  | 2.396452  |

---

---

|   |            |            |           |
|---|------------|------------|-----------|
| H | 3.550117   | -10.802912 | -1.8227   |
| H | 1.150598   | -11.274866 | -1.999621 |
| H | 5.54356    | -10.951709 | 2.081137  |
| H | 4.491619   | -8.509171  | -1.303039 |
| H | 10.806798  | -3.402524  | 2.194985  |
| H | 11.358731  | -1.032295  | 2.100201  |
| H | 10.414144  | -0.988078  | -2.096932 |
| H | 9.994883   | -3.382538  | -2.025731 |
| C | 10.301725  | -3.587084  | 0.102901  |
| C | 9.72816    | -4.952368  | 0.209056  |
| C | 8.655174   | -5.296234  | -0.627443 |
| C | 10.128347  | -5.86417   | 1.216036  |
| C | 7.979706   | -6.493532  | -0.40717  |
| H | 8.296259   | -4.591065  | -1.3687   |
| C | 9.438954   | -7.051344  | 1.443924  |
| H | 10.986346  | -5.624612  | 1.836823  |
| C | 8.324737   | -7.370015  | 0.656189  |
| H | -11.675956 | 1.255577   | -1.942402 |
| C | 10.883376  | 0.697861   | -0.004753 |
| C | 10.551441  | 1.423689   | 1.154104  |
| C | 11.054414  | 1.440275   | -1.18756  |
| C | 10.296336  | 2.788681   | 1.108837  |
| H | 10.421266  | 0.903253   | 2.097819  |
| C | 10.775422  | 2.802713   | -1.237837 |
| H | 11.367698  | 0.939539   | -2.098975 |
| C | 10.331111  | 3.503028   | -0.102117 |
| H | 10.835396  | 3.31424    | -2.194015 |
| C | -10.644777 | -1.276134  | -1.281742 |
| C | -10.350233 | -2.631632  | -1.36456  |
| C | -11.069301 | -0.693216  | -0.074333 |
| C | -10.453207 | -3.472007  | -0.242269 |
| H | -9.985405  | -3.038442  | -2.303665 |
| C | -11.304986 | -1.560317  | 1.007605  |
| C | -11.001433 | -2.917296  | 0.927091  |
| H | -11.685177 | -1.160185  | 1.943612  |
| H | -11.116774 | -3.539546  | 1.810385  |
| C | -0.760498  | -10.851463 | -0.058132 |
| C | -1.33592   | -10.358831 | -1.24348  |
| C | -1.636483  | -11.130322 | 1.006462  |
| C | -2.6897    | -10.060039 | -1.32253  |
| H | -0.70284   | -10.137535 | -2.097166 |
| C | -2.991603  | -10.815267 | 0.933002  |
| H | -1.247592  | -11.560911 | 1.925001  |
| C | -3.540619  | -10.217052 | -0.214494 |
| H | -3.088201  | -9.656114  | -2.248885 |
| H | -3.618217  | -10.97071  | 1.806939  |
| C | 0.806352   | 10.890223  | -0.085913 |
| C | 1.41292    | 10.637609  | -1.329541 |
| C | 1.656436   | 10.996879  | 1.030584  |
| C | 2.77857    | 10.388318  | -1.433544 |

---

---

|   |            |            |           |
|---|------------|------------|-----------|
| H | 0.795978   | 10.539464  | -2.217773 |
| C | 3.017318   | 10.726525  | 0.931202  |
| H | 1.243278   | 11.266004  | 1.998488  |
| C | 3.599029   | 10.360255  | -0.294317 |
| H | 3.197466   | 10.111563  | -2.397257 |
| H | 3.63886    | 10.774588  | 1.821683  |
| C | 4.963929   | 9.77762    | -0.365732 |
| C | 5.281638   | 8.758306   | 0.542778  |
| C | 5.877133   | 10.099794  | -1.395784 |
| C | 6.463403   | 8.042896   | 0.364226  |
| H | 4.561317   | 8.472766   | 1.302474  |
| C | 7.069365   | 9.3979     | -1.554754 |
| H | 5.633681   | 10.90606   | -2.081909 |
| C | 7.367584   | 8.3335     | -0.693299 |
| H | 7.745056   | 9.654333   | -2.366684 |
| C | -4.90161   | -9.624364  | -0.215137 |
| C | -5.981778  | -10.177693 | 0.512679  |
| C | -5.083527  | -8.401017  | -0.876703 |
| C | -7.202827  | -9.516563  | 0.62229   |
| H | -5.853167  | -11.139876 | 0.999899  |
| C | -6.306739  | -7.74716   | -0.768299 |
| H | -4.250053  | -7.934118  | -1.38969  |
| C | -7.379404  | -8.271653  | 0.002385  |
| H | -8.006108  | -9.959443  | 1.20551   |
| C | -9.837652  | -4.823123  | -0.244858 |
| C | -8.609921  | -4.977021  | -0.904963 |
| C | -10.363993 | -5.911265  | 0.490558  |
| C | -7.921383  | -6.179836  | -0.781762 |
| H | -8.166643  | -4.134135  | -1.423811 |
| C | -9.671333  | -7.113921  | 0.609353  |
| H | -11.32871  | -5.802272  | 0.977739  |
| C | -8.419699  | -7.260599  | -0.004895 |
| H | -10.093645 | -7.924614  | 1.197559  |
| C | 9.768792   | 4.872958   | -0.208525 |
| C | 8.698643   | 5.225757   | 0.627893  |
| C | 10.176482  | 5.781268   | -1.215654 |
| C | 8.033043   | 6.428514   | 0.407353  |
| H | 8.33395    | 4.523703   | 1.369287  |
| C | 9.496862   | 6.974022   | -1.443782 |
| H | 11.032523  | 5.534577   | -1.83635  |
| C | 8.385275   | 7.301953   | -0.656134 |
| H | 9.815333   | 7.632245   | -2.248049 |
| H | 10.021889  | 3.301095   | 2.026423  |
| H | -10.464433 | -0.645418  | -2.147262 |
| H | -9.958917  | 3.119603   | 2.304189  |
| H | 9.752001   | -7.712279  | 2.248095  |
| H | 7.665091   | -9.717401  | 2.366359  |
| N | -6.666961  | -6.50721   | -1.276765 |
| N | 6.851571   | -6.979516  | -1.055485 |
| N | 6.908858   | 6.92375    | 1.055501  |

---



|   |           |           |           |
|---|-----------|-----------|-----------|
| C | -5.804496 | -5.625264 | -2.03181  |
| H | -6.411224 | -4.986233 | -2.678583 |
| H | -5.188998 | -4.988091 | -1.382087 |
| C | 6.14115   | -6.306522 | -2.120613 |
| H | 6.855372  | -5.78434  | -2.762563 |
| H | 5.616979  | -7.044313 | -2.733544 |
| C | 6.193192  | 6.256417  | 2.120682  |
| H | 5.458787  | 5.533308  | 1.739855  |
| H | 6.903557  | 5.731139  | 2.764434  |
| H | 5.67242   | 6.998119  | 2.731741  |
| H | 5.410341  | -5.579835 | -1.739674 |
| H | -5.144601 | -6.218077 | -2.670577 |
| H | -6.368975 | 5.037345  | 2.67742   |

No imaginary frequency

Table S 6. Atomic coordinates of  $\alpha\beta\alpha$ -[16]CPP4N after geometry optimization (b3lyp/6-31g(d), methyl chains have been used instead of ethylhexyl chains,  $E=-4070.77815$  Hartree)

| Atoms | X (Å)      | Y (Å)     | Z (Å)     |
|-------|------------|-----------|-----------|
| C     | -8.286028  | -7.078357 | 0.090615  |
| C     | -8.482991  | -6.491814 | 1.35333   |
| C     | -9.291037  | -5.371089 | 1.513582  |
| C     | -9.933158  | -4.773574 | 0.415999  |
| C     | -9.826984  | -5.424011 | -0.825671 |
| C     | -9.027947  | -6.552551 | -0.983118 |
| C     | -10.53054  | -3.421089 | 0.553187  |
| C     | -10.226409 | -2.456902 | -0.418932 |
| C     | -10.563283 | -1.126461 | -0.174806 |
| C     | -11.212395 | -0.72357  | 1.023086  |
| C     | -11.585505 | -1.707374 | 1.947908  |
| C     | -11.242553 | -3.035036 | 1.713241  |
| C     | -9.932604  | 4.774636  | 0.416202  |
| C     | -9.290385  | 5.372019  | 1.513801  |
| C     | -8.482212  | 6.492658  | 1.353586  |
| C     | -8.285222  | 7.079249  | 0.090897  |
| C     | -9.027229  | 6.553586  | -0.982844 |
| H     | -7.921746  | -6.858075 | 2.207795  |
| H     | -9.34624   | -4.892589 | 2.487257  |
| H     | -10.361702 | -5.025267 | -1.683972 |
| H     | -8.960436  | -7.01864  | -1.962303 |
| H     | -9.63705   | -2.734589 | -1.286756 |
| H     | -12.104006 | -1.434313 | 2.863386  |
| H     | -11.506894 | -3.792906 | 2.444981  |
| H     | -9.345617  | 4.893472  | 2.487451  |
| H     | -8.959685  | 7.019718  | -1.962007 |
| C     | -9.826387  | 5.425126  | -0.825436 |
| C     | -10.530132 | 3.422211  | 0.553331  |
| C     | -11.242176 | 3.036189  | 1.713384  |
| C     | -10.226121 | 2.458035  | -0.418824 |

---

|   |            |           |           |
|---|------------|-----------|-----------|
| C | -11.585278 | 1.708562  | 1.947993  |
| H | -11.506427 | 3.794062  | 2.445152  |
| C | -10.563141 | 1.12761   | -0.174754 |
| H | -9.636729  | 2.735677  | -1.286638 |
| C | -11.21229  | 0.724748  | 1.023126  |
| H | -12.103816 | 1.435521  | 2.863457  |
| N | -10.241539 | 0.000578  | -0.922299 |
| C | -9.461452  | 0.000511  | -2.140401 |
| H | -9.711347  | -0.882819 | -2.733809 |
| H | -8.380424  | 0.000157  | -1.942925 |
| C | 8.348606   | 7.169255  | 0.116246  |
| C | 9.145779   | 6.709213  | -0.946975 |
| C | 9.917682   | 5.55654   | -0.826422 |
| C | 9.933802   | 4.812252  | 0.366007  |
| C | 9.244739   | 5.349348  | 1.467404  |
| C | 8.467321   | 6.494994  | 1.344692  |
| C | 10.49179   | 3.437007  | 0.408334  |
| C | 11.637913  | 3.052524  | -0.327164 |
| C | 12.027017  | 1.719123  | -0.426549 |
| C | 11.271021  | 0.724514  | 0.209153  |
| C | 10.155923  | 1.124858  | 0.993916  |
| C | 9.763303   | 2.456161  | 1.097075  |
| C | 9.917112   | -5.557688 | -0.826098 |
| C | 9.145075   | -6.710275 | -0.946614 |
| C | 8.347784   | -7.170145 | 0.116592  |
| C | 8.466503   | -6.495805 | 1.344996  |
| C | 9.24406    | -5.350248 | 1.467673  |
| H | 9.125697   | 7.232972  | -1.89882  |
| H | 10.453675  | 5.184855  | -1.695372 |
| H | 9.280178   | 4.832787  | 2.422655  |
| H | 7.880097   | 6.825692  | 2.196407  |
| H | 12.221207  | 3.816148  | -0.833559 |
| H | 8.85116    | 2.726825  | 1.617634  |
| H | 10.453198  | -5.186128 | -1.695045 |
| H | 9.124979   | -7.234096 | -1.898425 |
| H | 7.879179   | -6.82636  | 2.196697  |
| H | 9.279497   | -4.833615 | 2.422885  |
| C | 9.933259   | -4.81332  | 0.366279  |
| C | 10.491406  | -3.438139 | 0.408538  |
| C | 9.763018   | -2.457171 | 1.097208  |
| C | 11.637589  | -3.053832 | -0.326959 |
| C | 10.155793  | -1.125919 | 0.993976  |
| H | 8.850839   | -2.727702 | 1.617775  |
| C | 12.026845  | -1.720481 | -0.426419 |
| H | 12.220801  | -3.817553 | -0.833303 |
| C | 11.270948  | -0.725748 | 0.209207  |
| H | -7.920898  | 6.858806  | 2.208053  |
| C | 7.282886   | -8.186521 | -0.072231 |
| C | 6.574417   | -8.240258 | -1.285926 |
| C | 6.81729    | -8.997024 | 0.978431  |

---

---

|   |           |            |           |
|---|-----------|------------|-----------|
| C | 5.39815   | -8.970683  | -1.403748 |
| H | 6.906438  | -7.638999  | -2.127179 |
| C | 5.634281  | -9.723113  | 0.862657  |
| H | 7.363513  | -9.025241  | 1.917402  |
| C | 4.863491  | -9.676288  | -0.311843 |
| H | 5.263697  | -10.273588 | 1.723085  |
| C | 6.575265  | 8.239499   | -1.286214 |
| C | 5.399078  | 8.970059   | -1.40399  |
| C | 7.283827  | 8.185757   | -0.072572 |
| C | 4.864591  | 9.675796   | -0.312087 |
| H | 4.858672  | 8.956992   | -2.346511 |
| C | 6.818406  | 8.996375   | 0.978078  |
| C | 5.635471  | 9.722594   | 0.862354  |
| H | 7.3647    | 9.024575   | 1.917008  |
| H | 5.265013  | 10.273158  | 1.72278   |
| C | -7.208474 | 8.081027   | -0.108574 |
| C | -6.466962 | 8.090329   | -1.303569 |
| C | -6.773585 | 8.935787   | 0.920085  |
| C | -5.295078 | 8.827308   | -1.42218  |
| H | -6.77199  | 7.454272   | -2.129223 |
| C | -5.592398 | 9.664652   | 0.805908  |
| H | -7.344288 | 9.000278   | 1.842379  |
| C | -4.792906 | 9.581731   | -0.34735  |
| H | -4.734628 | 8.784037   | -2.3519   |
| H | -5.248522 | 10.250608  | 1.653761  |
| C | -7.209393 | -8.080255  | -0.108869 |
| C | -6.774651 | -8.935115  | 0.919768  |
| C | -6.467822 | -8.089583  | -1.303829 |
| C | -5.593544 | -9.664111  | 0.805613  |
| H | -7.345402 | -8.99958   | 1.842034  |
| C | -5.296019 | -8.826696  | -1.422421 |
| H | -6.772728 | -7.453444  | -2.129463 |
| C | -4.793988 | -9.581232  | -0.347604 |
| H | -5.249774 | -10.250145 | 1.653456  |
| H | -4.735514 | -8.783437  | -2.352108 |
| C | -3.411662 | -10.121764 | -0.375146 |
| C | -2.417089 | -9.354224  | -0.998796 |
| C | -3.040445 | -11.307668 | 0.301973  |
| C | -1.088695 | -9.756762  | -0.898241 |
| H | -2.677076 | -8.413822  | -1.472266 |
| C | -1.709335 | -11.704148 | 0.402836  |
| H | -3.813261 | -11.919811 | 0.75771   |
| C | -0.703144 | -10.917584 | -0.174733 |
| H | -1.455048 | -12.609579 | 0.94788   |
| C | -3.41052  | 10.122112  | -0.374938 |
| C | -3.039143 | 11.307965  | 0.30218   |
| C | -2.416057 | 9.354473   | -0.998646 |
| C | -1.707986 | 11.704305  | 0.40298   |
| H | -3.811873 | 11.920189  | 0.757956  |
| C | -1.087616 | 9.756869   | -0.898152 |

---

|   |            |            |           |
|---|------------|------------|-----------|
| H | -2.676167  | 8.414102   | -1.47211  |
| C | -0.701908  | 10.917645  | -0.174654 |
| H | -1.453577  | 12.609708  | 0.948013  |
| C | 3.473312   | 10.192851  | -0.347718 |
| C | 2.500726   | 9.40781    | -0.983923 |
| C | 3.072823   | 11.366569  | 0.333259  |
| C | 1.163219   | 9.780838   | -0.890771 |
| H | 2.78602    | 8.476214   | -1.460419 |
| C | 1.733033   | 11.736478  | 0.421939  |
| H | 3.829482   | 11.989975  | 0.800896  |
| C | 0.748323   | 10.932201  | -0.168328 |
| H | 1.455241   | 12.634134  | 0.968376  |
| C | 3.472159   | -10.193201 | -0.347553 |
| C | 2.499688   | -9.408077  | -0.983833 |
| C | 3.07151    | -11.366861 | 0.333429  |
| C | 1.162138   | -9.780968  | -0.890751 |
| H | 2.785099   | -8.476514  | -1.460323 |
| C | 1.731679   | -11.736636 | 0.422036  |
| H | 3.828078   | -11.990336 | 0.801121  |
| C | 0.747084   | -10.932274 | -0.168309 |
| H | 1.453764   | -12.634257 | 0.968468  |
| H | 4.85783    | -8.957621  | -2.346318 |
| H | 6.907142   | 7.638139   | -2.127451 |
| H | -10.361171 | 5.026487   | -1.683744 |
| H | 12.898454  | -1.454691  | -1.019058 |
| H | 12.898592  | 1.453199   | -1.019179 |
| N | 0.046375   | 9.108739   | -1.367773 |
| N | 9.526385   | -0.000481  | 1.507995  |
| N | 0.045387   | -9.108754  | -1.36781  |
| C | 0.06212    | 7.842242   | -2.065977 |
| H | 0.948711   | 7.787047   | -2.702965 |
| H | 0.068155   | 6.986785   | -1.376654 |
| C | 8.296836   | -0.000397  | 2.269741  |
| H | 8.265404   | -0.883791  | 2.91273   |
| H | 8.265443   | 0.883098   | 2.912592  |
| C | 0.061296   | -7.84226   | -2.066017 |
| H | 0.067349   | -6.986801  | -1.376697 |
| H | 0.947942   | -7.787143  | -2.702934 |
| H | -0.818912  | -7.768962  | -2.710057 |
| H | 7.407316   | -0.000428  | 1.62484   |
| H | -0.818146  | 7.769017   | -2.709946 |
| H | -9.710787  | 0.884177   | -2.733541 |

No imaginary frequency

Table S 7. Atomic coordinates of  $\alpha\alpha\alpha$ -[16]CPP4N after geometry optimization (b3lyp/6-31g(d), methyl chains have been used instead of ethylhexyl chains,  $E=-4070.77702$  Hartree)

| Atoms | X (Å)     | Y (Å)     | Z (Å)     |
|-------|-----------|-----------|-----------|
| C     | -7.302234 | -8.029537 | 0.098941  |
| C     | -6.863025 | -8.899379 | -0.915005 |
| C     | -5.661688 | -9.595497 | -0.80192  |

---

|   |           |            |           |
|---|-----------|------------|-----------|
| C | -4.84542  | -9.459246  | 0.334168  |
| C | -5.34798  | -8.689542  | 1.397676  |
| C | -6.541493 | -7.987995  | 1.281049  |
| C | -3.447401 | -9.958664  | 0.35233   |
| C | -2.463266 | -9.128181  | 0.907202  |
| C | -1.125952 | -9.498498  | 0.80121   |
| C | -0.724876 | -10.705892 | 0.16763   |
| C | -1.719956 | -11.549565 | -0.345426 |
| C | -3.058353 | -11.175287 | -0.256216 |
| C | 4.845626  | -9.45908   | 0.33379   |
| C | 5.661747  | -9.59511   | -0.802434 |
| C | 6.863071  | -8.898978  | -0.915542 |
| C | 7.302411  | -8.029336  | 0.098518  |
| C | 6.541819  | -7.988003  | 1.280729  |
| H | -7.447099 | -9.000977  | -1.825621 |
| H | -5.31633  | -10.196309 | -1.638866 |
| H | -4.771266 | -8.605923  | 2.314676  |
| H | -6.849929 | -7.337917  | 2.094459  |
| H | -2.744796 | -8.17681   | 1.345224  |
| H | -1.451733 | -12.487016 | -0.82582  |
| H | -3.823444 | -11.833085 | -0.658399 |
| H | 5.316279  | -10.19576  | -1.639451 |
| H | 6.850363  | -7.338062  | 2.094206  |
| C | 5.348321  | -8.689573  | 1.397377  |
| C | 3.447623  | -9.958536  | 0.352064  |
| C | 3.058559  | -11.175177 | -0.256441 |
| C | 2.463487  | -9.128094  | 0.907009  |
| C | 1.720169  | -11.549523 | -0.345566 |
| H | 3.823642  | -11.832954 | -0.658674 |
| C | 1.126195  | -9.498508  | 0.801105  |
| H | 2.744935  | -8.176689  | 1.345008  |
| C | 0.725091  | -10.705895 | 0.167563  |
| H | 1.451968  | -12.486987 | -0.825947 |
| N | 0.000157  | -8.783845  | 1.185545  |
| C | 0.00045   | -7.500773  | 1.853519  |
| H | -0.883527 | -6.930747  | 1.555979  |
| H | 0.882189  | -6.929139  | 1.552303  |
| C | 7.281923  | 8.014679   | 0.076927  |
| C | 6.533149  | 7.990013   | 1.267124  |
| C | 5.345582  | 8.700662   | 1.389173  |
| C | 4.836089  | 9.462535   | 0.323245  |
| C | 5.640141  | 9.579553   | -0.823748 |
| C | 6.836044  | 8.875256   | -0.942041 |
| C | -3.444233 | 9.976961   | 0.354455  |
| C | -3.057586 | 11.180582  | -0.281034 |
| C | -1.721049 | 11.562057  | -0.368998 |
| C | -0.725329 | 10.741071  | 0.178075  |
| C | -1.125699 | 9.557118   | 0.854581  |
| C | -2.459595 | 9.170662   | 0.943874  |
| C | -5.345831 | 8.700515   | 1.38912   |

---

---

|   |            |           |           |
|---|------------|-----------|-----------|
| C | -6.53337   | 7.989826  | 1.267044  |
| C | -7.282168  | 8.014544  | 0.076866  |
| C | -6.836348  | 8.875213  | -0.94205  |
| C | -5.640475  | 9.579564  | -0.823732 |
| H | 6.84637    | 7.347152  | 2.08441   |
| H | 4.779074   | 8.631133  | 2.313638  |
| H | 5.289497   | 10.172721 | -1.663879 |
| H | 7.410748   | 8.963833  | -1.859916 |
| H | -3.822802  | 11.819865 | -0.711744 |
| H | -2.733532  | 8.218018  | 1.383938  |
| H | -4.779282  | 8.630931  | 2.313556  |
| H | -6.846545  | 7.346896  | 2.084296  |
| H | -7.411066  | 8.963837  | -1.859912 |
| H | -5.289867  | 10.172807 | -1.663824 |
| C | -4.836398  | 9.462497  | 0.323239  |
| C | 3.443917   | 9.976983  | 0.354466  |
| C | 2.459276   | 9.170661  | 0.943851  |
| C | 3.057263   | 11.180622 | -0.280986 |
| C | 1.125373   | 9.557098  | 0.854583  |
| H | 2.733233   | 8.218002  | 1.383869  |
| C | 1.720722   | 11.562072 | -0.368961 |
| H | 3.822469   | 11.819928 | -0.711677 |
| C | 0.725006   | 10.741067 | 0.178091  |
| H | 7.447043   | -9.000394 | -1.826245 |
| C | -8.379483  | 7.036515  | -0.128082 |
| C | -9.131598  | 6.521457  | 0.943695  |
| C | -8.586184  | 6.45776   | -1.392724 |
| C | -9.948568  | 5.406471  | 0.783005  |
| H | -9.056615  | 6.984231  | 1.923942  |
| C | -9.411307  | 5.349736  | -1.555954 |
| H | -8.018546  | 6.817658  | -2.245759 |
| C | -10.062015 | 4.759029  | -0.459706 |
| H | -9.472523  | 4.873908  | -2.530585 |
| C | 9.131419   | 6.521699  | 0.943847  |
| C | 9.948437   | 5.406748  | 0.7832    |
| C | 8.3793     | 7.036689  | -0.127962 |
| C | 10.061934  | 4.759277  | -0.459492 |
| H | 10.490203  | 5.01474   | 1.64017   |
| C | 8.58605    | 6.457916  | -1.392586 |
| C | 9.411232   | 5.349925  | -1.555772 |
| H | 8.018417   | 6.81778   | -2.245639 |
| H | 9.472495   | 4.874074  | -2.530388 |
| C | 8.403703   | -7.055689 | -0.106208 |
| C | 9.149209   | -6.533554 | 0.966735  |
| C | 8.618132   | -6.485438 | -1.373386 |
| C | 9.965924   | -5.418707 | 0.803888  |
| H | 9.068276   | -6.99007  | 1.949463  |
| C | 9.442521   | -5.377126 | -1.538515 |
| H | 8.056013   | -6.851569 | -2.227446 |
| C | 10.08507   | -4.778139 | -0.441922 |

---

---

|   |            |           |           |
|---|------------|-----------|-----------|
| H | 10.502078  | -5.020718 | 1.661628  |
| H | 9.508479   | -4.907177 | -2.515671 |
| C | -8.403528  | -7.055913 | -0.105854 |
| C | -8.618046  | -6.485831 | -1.373095 |
| C | -9.148977  | -6.533636 | 0.967057  |
| C | -9.442435  | -5.377537 | -1.538321 |
| H | -8.055993  | -6.85207  | -2.227151 |
| C | -9.965704  | -5.418807 | 0.804114  |
| H | -9.068003  | -6.990011 | 1.949849  |
| C | -10.084923 | -4.778401 | -0.441771 |
| H | -9.508451  | -4.90772  | -2.515536 |
| H | -10.501805 | -5.020711 | 1.661837  |
| C | -10.689773 | -3.429575 | -0.582424 |
| C | -10.390696 | -2.463702 | 0.389587  |
| C | -11.398708 | -3.045315 | -1.745039 |
| C | -10.727316 | -1.133961 | 0.142605  |
| H | -9.803025  | -2.738959 | 1.259247  |
| C | -11.740914 | -1.717902 | -1.982913 |
| H | -11.660148 | -3.803927 | -2.477068 |
| C | -11.370862 | -0.732197 | -1.058654 |
| H | -12.255746 | -1.446507 | -2.900955 |
| C | 10.689924  | -3.429299 | -0.582438 |
| C | 11.398996  | -3.044976 | -1.744949 |
| C | 10.390705  | -2.46347  | 0.389574  |
| C | 11.74121   | -1.717546 | -1.982721 |
| H | 11.660547  | -3.803553 | -2.476974 |
| C | 10.727329  | -1.133712 | 0.142692  |
| H | 9.802929   | -2.738776 | 1.259147  |
| C | 11.371017  | -0.731886 | -1.05847  |
| H | 12.256155  | -1.446103 | -2.900685 |
| C | 10.671608  | 3.41221   | -0.596068 |
| C | 10.378012  | 2.44886   | 0.380066  |
| C | 11.381272  | 3.02692   | -1.757845 |
| C | 10.721204  | 1.11985   | 0.138165  |
| H | 9.789896   | 2.724901  | 1.249196  |
| C | 11.73074   | 1.700419  | -1.990283 |
| H | 11.637864  | 3.783943  | -2.493234 |
| C | 11.366804  | 0.71666   | -1.061544 |
| H | 12.246456  | 1.427944  | -2.907507 |
| C | -10.671616 | 3.411934  | -0.59632  |
| C | -10.378116 | 2.448628  | 0.379885  |
| C | -11.381134 | 3.026583  | -1.758167 |
| C | -10.72124  | 1.119599  | 0.137989  |
| H | -9.790118  | 2.724715  | 1.249082  |
| C | -11.730531 | 1.700063  | -1.990603 |
| H | -11.637663 | 3.78357   | -2.493615 |
| C | -11.366684 | 0.716348  | -1.061783 |
| H | -12.246122 | 1.42754   | -2.907884 |
| H | -10.490325 | 5.014416  | 1.639959  |
| H | 9.056393   | 6.984509  | 1.924071  |

---

|   |            |           |           |
|---|------------|-----------|-----------|
| H | 4.771735   | -8.606135 | 2.314472  |
| H | 1.45438    | 12.484105 | -0.879303 |
| H | -1.454721  | 12.48409  | -0.879347 |
| N | 10.406624  | -0.006284 | 0.889802  |
| N | -0.000176  | 8.876928  | 1.298339  |
| N | -10.406732 | -0.006497 | 0.889711  |
| C | 9.630269   | -0.005901 | 2.110234  |
| H | 9.879643   | 0.879234  | 2.701157  |
| H | 8.548617   | -0.008772 | 1.916096  |
| C | -0.000297  | 7.584194  | 1.946805  |
| H | 0.883626   | 7.494607  | 2.58364   |
| H | -0.883364  | 7.4954    | 2.584964  |
| C | -9.630549  | -0.00605  | 2.110252  |
| H | -8.548869  | -0.008918 | 1.916267  |
| H | -9.880016  | 0.87911   | 2.701099  |
| H | -9.884145  | -0.88786  | 2.704335  |
| H | -0.001212  | 6.756248  | 1.224713  |
| H | 9.883791   | -0.887736 | 2.704312  |
| H | 0.002812   | -7.602864 | 2.946817  |

No imaginary frequency

Table S 8. Atomic coordinates of  $\alpha\alpha\alpha$ -[12]CPP3N after geometry optimization (b3lyp/6-31g(d), methyl chains have been used instead of ethylhexyl chains,  $E=-3053.04469$  Hartree)

| Atoms | X (Å)     | Y (Å)     | Z (Å)     |
|-------|-----------|-----------|-----------|
| C     | 7.756176  | -2.264725 | 0.867909  |
| C     | 7.273198  | -3.567019 | 0.83253   |
| C     | 7.143631  | -4.273027 | -0.378581 |
| C     | 7.681792  | -3.655762 | -1.52318  |
| C     | 8.139337  | -2.341534 | -1.49304  |
| C     | 6.274746  | -5.47699  | -0.459533 |
| C     | 5.890957  | -6.204438 | 0.683874  |
| C     | 4.793115  | -7.060091 | 0.66359   |
| C     | 4.043433  | -7.254373 | -0.509016 |
| C     | 4.53424   | -6.67149  | -1.688511 |
| C     | 5.615135  | -5.796319 | -1.661234 |
| C     | 2.663693  | -7.808351 | -0.489695 |
| C     | 1.778536  | -7.268307 | 0.453674  |
| C     | 0.41257   | -7.499945 | 0.305389  |
| C     | -0.104874 | -8.303554 | -0.746552 |
| C     | 0.799982  | -8.918838 | -1.623466 |
| C     | 2.163146  | -8.660548 | -1.501235 |
| C     | -5.785548 | -5.563766 | 0.860547  |
| C     | -6.678095 | -4.500068 | 0.811412  |
| C     | -7.224532 | -4.051717 | -0.406074 |
| C     | -6.950636 | -4.836063 | -1.542058 |
| C     | -6.03555  | -5.884087 | -1.498116 |
| C     | -7.84231  | -2.702714 | -0.50168  |
| C     | -8.299726 | -2.003756 | 0.632342  |
| C     | -8.501902 | -0.626776 | 0.601814  |



---

|   |           |           |           |
|---|-----------|-----------|-----------|
| C | -8.285413 | 0.114659  | -0.572235 |
| C | -8.00624  | -0.606529 | -1.744423 |
| C | -7.779497 | -1.978426 | -1.70683  |
| C | -8.083193 | 1.587679  | -0.558901 |
| C | -7.192289 | 2.09506   | 0.397102  |
| C | -6.707758 | 3.392627  | 0.244294  |
| C | -7.12468  | 4.230725  | -0.825221 |
| C | -8.094307 | 3.74557   | -1.714543 |
| C | -8.553734 | 2.437006  | -1.587282 |
| C | -6.264256 | 5.397383  | -0.788362 |
| C | -5.359449 | 5.193055  | 0.28747   |
| C | -4.250534 | 6.011933  | 0.484653  |
| C | -4.01793  | 7.076887  | -0.39907  |
| C | -4.975732 | 7.346463  | -1.407325 |
| C | -6.079993 | 6.52255   | -1.604661 |
| C | -2.682475 | 7.727017  | -0.3687   |
| C | -1.911239 | 7.767418  | 0.806976  |
| C | -0.541642 | 7.998265  | 0.766964  |
| C | 0.131555  | 8.232617  | -0.447023 |
| C | -0.674473 | 8.383815  | -1.59074  |
| C | -2.041652 | 8.125097  | -1.555762 |
| C | 1.608613  | 8.084475  | -0.530394 |
| C | 2.434613  | 8.133712  | 0.609347  |
| C | 3.727641  | 7.618234  | 0.590011  |
| C | 4.269331  | 7.055284  | -0.578143 |
| C | 3.512653  | 7.168583  | -1.755697 |
| C | 2.211729  | 7.660102  | -1.729199 |
| C | 5.44666   | 6.147512  | -0.554446 |
| C | 5.441078  | 5.126606  | 0.40615   |
| C | 6.330084  | 4.062986  | 0.263471  |
| C | 7.270256  | 4.005398  | -0.801007 |
| C | 7.333029  | 5.08354   | -1.695426 |
| C | 6.42294   | 6.131045  | -1.577694 |
| C | 7.859225  | 2.681149  | -0.754095 |
| C | 7.229761  | 2.001774  | 0.322858  |
| C | 7.39291   | 0.634287  | 0.52891   |
| C | 8.918676  | 0.593858  | -1.357045 |
| C | 8.749574  | 1.960036  | -1.5626   |
| H | 7.794907  | -1.746154 | 1.821761  |
| H | 6.908249  | -4.005175 | 1.756044  |
| H | 7.679796  | -4.180844 | -2.473702 |
| H | 8.434678  | -1.870556 | -2.426035 |
| H | 6.423102  | -6.062972 | 1.620058  |
| H | 4.482463  | -7.551243 | 1.582419  |
| H | 3.986459  | -6.80876  | -2.616786 |
| H | 5.871868  | -5.270223 | -2.57494  |
| H | 2.15026   | -6.574804 | 1.200783  |
| H | 0.439853  | -9.553836 | -2.428887 |
| H | 2.857433  | -9.097702 | -2.213367 |
| H | -5.356338 | -5.844051 | 1.818409  |
| H | -6.880787 | -3.955621 | 1.728268  |

---

---

|   |           |           |           |
|---|-----------|-----------|-----------|
| H | -7.403202 | -4.583791 | -2.496448 |
| H | -5.76988  | -6.384316 | -2.424836 |
| H | -8.450987 | -2.531644 | 1.569462  |
| H | -8.787389 | -0.109147 | 1.514246  |
| H | -7.842712 | -0.067502 | -2.673543 |
| H | -7.436945 | -2.466833 | -2.613346 |
| H | -6.789482 | 1.434118  | 1.157424  |
| H | -8.449136 | 4.366259  | -2.533365 |
| H | -9.26573  | 2.046472  | -2.308956 |
| H | -3.507711 | 5.755198  | 1.231128  |
| H | -4.829316 | 8.199095  | -2.063726 |
| H | -6.771259 | 6.732399  | -2.416897 |
| H | -2.37765  | 7.54743   | 1.76318   |
| H | 0.022866  | 7.90542   | 1.689382  |
| H | -0.220469 | 8.639045  | -2.543618 |
| H | -2.599581 | 8.141205  | -2.487412 |
| H | 2.047475  | 8.533516  | 1.542078  |
| H | 4.312423  | 7.610157  | 1.506499  |
| H | 3.903538  | 6.752913  | -2.680341 |
| H | 1.623757  | 7.604415  | -2.639574 |
| H | 4.663291  | 5.107298  | 1.162404  |
| H | 8.05231   | 5.080765  | -2.510445 |
| H | 6.440053  | 6.939865  | -2.302795 |
| H | 6.799463  | 0.119942  | 1.276004  |
| H | 9.58951   | 0.041138  | -2.008048 |
| H | 9.27705   | 2.452481  | -2.375544 |
| C | 8.206708  | -0.099581 | -0.347661 |
| C | 8.108775  | -1.581473 | -0.309988 |
| C | -5.3642   | -6.221553 | -0.309186 |
| C | -4.127634 | -7.044466 | -0.332832 |
| C | -3.881012 | -8.026094 | -1.323749 |
| C | -3.08704  | -6.689867 | 0.539253  |
| C | -2.613363 | -8.568295 | -1.514908 |
| H | -4.693685 | -8.342041 | -1.971114 |
| C | -1.82161  | -7.238478 | 0.348241  |
| H | -3.23751  | -5.904378 | 1.270934  |
| C | -1.545977 | -8.144954 | -0.710006 |
| H | -2.448967 | -9.286899 | -2.313771 |
| N | 6.367013  | 2.871941  | 0.978633  |
| N | -0.638562 | -6.917429 | 1.003448  |
| N | -5.688577 | 4.017882  | 0.952585  |
| C | -4.912014 | 3.40774   | 2.020777  |
| H | -5.601814 | 2.819971  | 2.634456  |
| H | -4.536328 | 4.212797  | 2.663233  |
| C | 5.451008  | 2.503143  | 2.046872  |
| H | 5.268697  | 3.399285  | 2.648097  |
| H | 5.969338  | 1.792261  | 2.701242  |
| C | -0.499478 | -5.911168 | 2.044177  |
| H | 0.359389  | -6.189058 | 2.665728  |
| H | -1.381302 | -5.975945 | 2.691816  |
| C | 4.128814  | 1.895848  | 1.54675   |

---

|   |           |           |          |
|---|-----------|-----------|----------|
| H | 3.618337  | 2.627739  | 0.907081 |
| H | 4.363601  | 1.036332  | 0.906955 |
| C | 3.191057  | 1.449182  | 2.680076 |
| H | 2.355902  | 0.892049  | 2.236333 |
| H | 3.718721  | 0.734913  | 3.328869 |
| C | 2.628713  | 2.59545   | 3.53075  |
| H | 2.094852  | 3.323156  | 2.907031 |
| H | 1.922723  | 2.21809   | 4.279105 |
| H | 3.415538  | 3.134723  | 4.070849 |
| C | -0.331356 | -4.478988 | 1.511572 |
| H | 0.547684  | -4.442652 | 0.855072 |
| H | -1.19652  | -4.226187 | 0.884834 |
| C | -0.183786 | -3.44842  | 2.637794 |
| H | -1.063543 | -3.497212 | 3.295513 |
| H | 0.679709  | -3.713731 | 3.264559 |
| C | -0.015095 | -2.016886 | 2.117825 |
| H | -0.879479 | -1.709838 | 1.51673  |
| H | 0.088986  | -1.303785 | 2.943687 |
| H | 0.876023  | -1.928687 | 1.484668 |
| C | -3.744508 | 2.540396  | 1.51902  |
| H | -4.143116 | 1.735975  | 0.887059 |
| H | -3.109307 | 3.156889  | 0.87112  |
| C | -2.893121 | 1.941034  | 2.649962 |
| H | -2.010398 | 1.467569  | 2.201277 |
| H | -2.509906 | 2.751764  | 3.286621 |
| C | -3.622932 | 0.908436  | 3.518895 |
| H | -4.017409 | 0.087547  | 2.907166 |
| H | -2.945208 | 0.472946  | 4.261781 |
| H | -4.464198 | 1.348478  | 4.06675  |

No imaginary frequency

Table S 9. Atomic coordinates of  $\alpha\beta\alpha$ -[12]CPP3N after geometry optimization (b3lyp/6-31g(d), methyl chains have been used instead of ethylhexyl chains,  $E=-3053.04493$  Hartree)

| Atoms | X (Å)     | Y (Å)    | Z (Å)     |
|-------|-----------|----------|-----------|
| C     | -6.713149 | 5.377584 | 0.774671  |
| C     | -5.752902 | 6.385063 | 0.786412  |
| C     | -4.930427 | 6.625647 | -0.331211 |
| C     | -5.250707 | 5.933235 | -1.513638 |
| C     | -6.229118 | 4.943814 | -1.534334 |
| C     | -3.646495 | 7.367288 | -0.220856 |
| C     | -2.981354 | 7.438401 | 1.017562  |
| C     | -1.639204 | 7.784982 | 1.101806  |
| C     | -0.87944  | 8.05562  | -0.050153 |
| C     | -1.580664 | 8.147468 | -1.265186 |
| C     | -2.932709 | 7.820876 | -1.345897 |
| C     | 0.604592  | 8.005766 | -0.010878 |
| C     | 1.18984   | 7.061897 | 0.845987  |
| C     | 2.551896  | 6.802159 | 0.741579  |
| C     | 3.379095  | 7.459824 | -0.208599 |
| C     | 2.799536  | 8.457217 | -1.006937 |
| C     | 1.434605  | 8.720416 | -0.907582 |

---

|   |           |           |           |
|---|-----------|-----------|-----------|
| C | 7.646042  | 2.807234  | 1.355055  |
| C | 8.076967  | 1.488562  | 1.286823  |
| C | 8.442924  | 0.896951  | 0.062881  |
| C | 8.524177  | 1.756257  | -1.049527 |
| C | 8.069393  | 3.071076  | -0.98662  |
| C | 8.471151  | -0.583529 | -0.069545 |
| C | 8.574362  | -1.439575 | 1.043562  |
| C | 8.170118  | -2.770603 | 0.976345  |
| C | 7.663318  | -3.31976  | -0.214666 |
| C | 7.758246  | -2.521808 | -1.369052 |
| C | 8.138604  | -1.187897 | -1.296768 |
| C | 0.911725  | -7.993035 | -0.072288 |
| C | 1.466936  | -7.024173 | -0.921273 |
| C | 2.816688  | -6.711269 | -0.804142 |
| C | 3.660736  | -7.338284 | 0.151965  |
| C | 3.113889  | -8.360111 | 0.942536  |
| C | 1.761456  | -8.67696  | 0.830053  |
| C | 4.918472  | -6.613063 | 0.120941  |
| C | 4.762268  | -5.587457 | -0.850249 |
| C | 5.700072  | -4.574498 | -1.017857 |
| C | 6.845626  | -4.559773 | -0.208281 |
| C | 7.05028   | -5.624999 | 0.701805  |
| C | 6.106418  | -6.636711 | 0.866867  |
| C | -0.569296 | -8.101428 | -0.0469   |
| C | -1.278347 | -8.230059 | 1.160254  |
| C | -2.642243 | -7.954873 | 1.230481  |
| C | -3.362958 | -7.51761  | 0.102797  |
| C | -2.683448 | -7.555674 | -1.129719 |
| C | -1.328815 | -7.851278 | -1.203653 |
| C | -4.672904 | -6.823111 | 0.207997  |
| C | -5.055503 | -6.19193  | 1.406805  |
| C | -6.060913 | -5.232841 | 1.435354  |
| C | -6.720572 | -4.825455 | 0.261223  |
| C | -6.458832 | -5.577831 | -0.89823  |
| C | -5.472697 | -6.559043 | -0.919859 |
| C | -7.457805 | -3.5374   | 0.187895  |
| C | -7.047229 | -2.491366 | 1.028894  |
| C | -7.49808  | -1.198722 | 0.776416  |
| C | -8.345925 | -0.895972 | -0.322052 |
| C | -8.835717 | -1.961021 | -1.09111  |
| C | -8.401053 | -3.257566 | -0.831772 |
| C | -8.370883 | 0.550311  | -0.432208 |
| C | -7.557246 | 1.045271  | 0.622839  |
| C | -7.191914 | 2.386596  | 0.707738  |
| C | -8.473041 | 2.797377  | -1.316598 |
| C | -8.862784 | 1.461188  | -1.377883 |
| H | -7.281039 | 5.170352  | 1.678273  |
| H | -5.606391 | 6.955833  | 1.69885   |
| H | -4.651074 | 6.083931  | -2.405818 |
| H | -6.372611 | 4.358054  | -2.438223 |
| H | -3.492225 | 7.128816  | 1.923726  |

---

---

|   |           |           |           |
|---|-----------|-----------|-----------|
| H | -1.153105 | 7.778294  | 2.073418  |
| H | -1.041256 | 8.385036  | -2.17798  |
| H | -3.418508 | 7.854504  | -2.316849 |
| H | 0.564033  | 6.459561  | 1.494627  |
| H | 3.401226  | 9.000762  | -1.730898 |
| H | 0.992729  | 9.477769  | -1.548821 |
| H | 7.320223  | 3.204913  | 2.312146  |
| H | 8.031644  | 0.88485   | 2.187565  |
| H | 8.874991  | 1.374969  | -2.004042 |
| H | 8.038571  | 3.659932  | -1.899152 |
| H | 8.901802  | -1.04569  | 2.001282  |
| H | 8.153329  | -3.360742 | 1.888427  |
| H | 7.456121  | -2.930979 | -2.329052 |
| H | 8.078583  | -0.585917 | -2.197799 |
| H | 0.823807  | -6.444846 | -1.573844 |
| H | 3.730171  | -8.881652 | 1.670414  |
| H | 1.344386  | -9.453417 | 1.465039  |
| H | 5.49136   | -3.738311 | -1.675234 |
| H | 7.953897  | -5.640791 | 1.304453  |
| H | 6.278627  | -7.418585 | 1.602144  |
| H | -0.739372 | -8.454734 | 2.07659   |
| H | -3.133516 | -8.01533  | 2.197254  |
| H | -3.195026 | -7.25961  | -2.039668 |
| H | -0.835266 | -7.819503 | -2.170961 |
| H | -4.500114 | -6.382309 | 2.319769  |
| H | -6.287384 | -4.742197 | 2.377686  |
| H | -6.964794 | -5.329094 | -1.826274 |
| H | -5.27767  | -7.074264 | -1.855587 |
| H | -6.285531 | -2.665016 | 1.78024   |
| H | -9.518256 | -1.776211 | -1.916669 |
| H | -8.767965 | -4.069175 | -1.452797 |
| H | -6.485139 | 2.727477  | 1.457163  |
| H | -8.813495 | 3.490455  | -2.080836 |
| H | -9.50083  | 1.12067   | -2.189379 |
| C | -7.60909  | 3.266903  | -0.300733 |
| C | -6.919374 | 4.583072  | -0.365793 |
| C | 7.531309  | 3.600821  | 0.199449  |
| C | 6.666793  | 4.808591  | 0.184712  |
| C | 6.837732  | 5.8797    | -0.725417 |
| C | 5.514721  | 4.780125  | 0.984628  |
| C | 5.856595  | 6.853532  | -0.900514 |
| H | 7.74511   | 5.929717  | -1.320481 |
| C | 4.539732  | 5.755599  | 0.807235  |
| H | 5.33303   | 3.937167  | 1.641386  |
| C | 4.664079  | 6.784699  | -0.164774 |
| H | 6.004417  | 7.640213  | -1.635956 |
| N | -7.103646 | -0.017974 | 1.393405  |
| N | 3.286184  | 5.825002  | 1.398207  |
| N | 3.517568  | -5.704311 | -1.452047 |
| C | 2.95388   | -4.767786 | -2.399427 |
| H | 2.214693  | -5.27866  | -3.021709 |

---

|   |           |           |           |
|---|-----------|-----------|-----------|
| H | 3.743306  | -4.393722 | -3.056296 |
| C | -6.13099  | 0.081238  | 2.45949   |
| H | -6.251618 | -0.763673 | 3.142342  |
| H | -6.304762 | 0.998542  | 3.027778  |
| C | 2.750782  | 4.86829   | 2.341574  |
| H | 1.988919  | 5.351545  | 2.958666  |
| H | 3.548854  | 4.523436  | 3.00394   |
| H | 2.470698  | -3.914032 | -1.90442  |
| H | -5.098589 | 0.088261  | 2.082681  |
| H | 2.3029    | 3.997318  | 1.843253  |
| C | -6.713149 | 5.377584  | 0.774671  |
| C | -5.752902 | 6.385063  | 0.786412  |
| C | -4.930427 | 6.625647  | -0.331211 |
| C | -5.250707 | 5.933235  | -1.513638 |
| C | -6.229118 | 4.943814  | -1.534334 |
| C | -3.646495 | 7.367288  | -0.220856 |
| C | -2.981354 | 7.438401  | 1.017562  |
| C | -1.639204 | 7.784982  | 1.101806  |
| C | -0.87944  | 8.05562   | -0.050153 |
| C | -1.580664 | 8.147468  | -1.265186 |
| C | -2.932709 | 7.820876  | -1.345897 |
| C | 0.604592  | 8.005766  | -0.010878 |
| C | 1.18984   | 7.061897  | 0.845987  |
| C | 2.551896  | 6.802159  | 0.741579  |
| C | 3.379095  | 7.459824  | -0.208599 |
| C | 2.799536  | 8.457217  | -1.006937 |
| C | 1.434605  | 8.720416  | -0.907582 |
| C | 7.646042  | 2.807234  | 1.355055  |
| C | 8.076967  | 1.488562  | 1.286823  |
| C | 8.442924  | 0.896951  | 0.062881  |
| C | 8.524177  | 1.756257  | -1.049527 |
| C | 8.069393  | 3.071076  | -0.98662  |
| C | 8.471151  | -0.583529 | -0.069545 |
| C | 8.574362  | -1.439575 | 1.043562  |
| C | 8.170118  | -2.770603 | 0.976345  |
| C | 7.663318  | -3.31976  | -0.214666 |
| C | 7.758246  | -2.521808 | -1.369052 |

No imaginary frequency

Table S 10. Atomic coordinates of [8]CPP4N after geometry optimization (b3lyp/6-31g(d))

| Atoms | X (Å)     | Y (Å)     | Z (Å)     |
|-------|-----------|-----------|-----------|
| N     | 3.905216  | -0.58033  | -2.72035  |
| C     | 4.387727  | 0.461458  | -1.928899 |
| C     | 4.187643  | -1.775631 | -2.063766 |
| C     | 3.001817  | -0.46021  | -3.85512  |
| N     | -0.28654  | -5.136497 | 1.291706  |
| C     | -1.580827 | -5.169568 | 0.771711  |
| C     | 0.594622  | -5.359082 | 0.235844  |
| N     | 0.576123  | 4.143806  | 1.858547  |

---

|   |           |           |           |
|---|-----------|-----------|-----------|
| C | -0.68163  | 4.498112  | 1.36977   |
| C | 1.497255  | 4.335115  | 0.831358  |
| C | 3.540325  | -3.001827 | -2.226667 |
| C | 5.03597   | -1.518062 | -0.954563 |
| C | 3.693405  | -3.985789 | -1.239229 |
| H | 2.771225  | -3.120068 | -2.982215 |
| C | 4.66412   | -3.792164 | -0.225824 |
| C | 2.563726  | -4.95113  | -1.094083 |
| C | 1.935768  | -4.978898 | 0.159858  |
| C | 1.89177   | -5.510761 | -2.207994 |
| C | 0.562582  | -5.916323 | -2.123178 |
| H | 2.399577  | -5.545046 | -3.168136 |
| C | -0.134384 | -5.760554 | -0.914726 |
| H | 0.047121  | -6.264395 | -3.014914 |
| C | -1.537901 | -5.641361 | -0.568355 |
| H | 2.422871  | -4.514151 | 1.009554  |
| C | 5.332943  | -2.579454 | -0.084842 |
| H | 4.827477  | -4.579364 | 0.50526   |
| H | 6.013144  | -2.432725 | 0.75054   |
| C | 5.168007  | -0.076102 | -0.869409 |
| C | 5.652127  | 0.800719  | 0.114576  |
| C | 5.222216  | 2.124125  | 0.1303    |
| H | 6.288941  | 0.430684  | 0.914338  |
| C | 4.308469  | 2.611073  | -0.836    |
| H | 5.524972  | 2.774835  | 0.946236  |
| C | 3.977626  | 1.796159  | -1.928043 |
| C | 3.37418   | 3.742559  | -0.559392 |
| C | 2.747857  | 3.729921  | 0.695323  |
| C | 2.829164  | 4.549745  | -1.587716 |
| H | 3.133263  | 3.083686  | 1.476417  |
| C | 0.869207  | 5.00785   | -0.249982 |
| C | 1.597434  | 5.181085  | -1.437694 |
| C | -0.534731 | 5.11584   | 0.098291  |
| H | 1.166763  | 5.728364  | -2.272585 |
| H | 3.345958  | 4.608393  | -2.541936 |
| H | 3.238023  | 2.145938  | -2.639831 |
| C | 3.617954  | -0.93305  | -5.191505 |
| H | 2.69816   | 0.586202  | -3.935056 |
| H | 2.091497  | -1.031874 | -3.63648  |
| C | 4.882729  | -0.134107 | -5.578152 |
| H | 3.942769  | -1.973577 | -5.042893 |
| C | 4.681429  | 1.348658  | -5.92729  |
| H | 5.344714  | -0.636833 | -6.439945 |
| H | 5.609352  | -0.211042 | -4.758842 |
| C | 5.994506  | 2.048003  | -6.30611  |
| H | 3.97132   | 1.448337  | -6.760146 |
| H | 4.235169  | 1.882147  | -5.076316 |
| C | 5.811272  | 3.528336  | -6.655041 |
| H | 6.706067  | 1.952801  | -5.474166 |
| H | 6.450359  | 1.524007  | -7.158344 |
| H | 5.128431  | 3.655037  | -7.504454 |

---

---

|   |           |           |           |
|---|-----------|-----------|-----------|
| H | 6.765078  | 3.997341  | -6.922235 |
| H | 5.392763  | 4.086136  | -5.808123 |
| H | 0.702058  | -3.676549 | 2.39495   |
| H | -0.798324 | -4.258149 | 3.09781   |
| C | 0.892909  | -5.546537 | 3.501466  |
| C | 0.108521  | -4.581611 | 2.579516  |
| H | 1.638043  | -6.073301 | 2.887516  |
| C | 1.647981  | -4.731329 | 4.57967   |
| H | 1.938234  | -5.417268 | 5.384773  |
| C | 2.900229  | -3.991123 | 4.083676  |
| H | 0.954377  | -4.008808 | 5.038712  |
| H | 3.611979  | -4.725394 | 3.677508  |
| H | 2.639701  | -3.326972 | 3.248819  |
| C | 3.606451  | -3.149013 | 5.160939  |
| H | 4.403117  | -2.566824 | 4.678922  |
| H | 2.896666  | -2.41351  | 5.566243  |
| C | 4.213156  | -3.961127 | 6.311591  |
| H | 4.925257  | -4.706465 | 5.935385  |
| H | 4.752334  | -3.310043 | 7.009112  |
| H | 3.448249  | -4.494265 | 6.887123  |
| C | -2.734253 | -4.591122 | 1.304392  |
| C | -2.728339 | -5.650398 | -1.311971 |
| C | -3.859687 | -4.43134  | 0.482721  |
| H | -2.704562 | -4.079533 | 2.260046  |
| C | -3.869904 | -5.047399 | -0.792071 |
| H | -2.740098 | -6.045311 | -2.324849 |
| C | -4.775739 | -3.307396 | 0.838984  |
| H | -4.762941 | -4.974486 | -1.406929 |
| C | -4.955586 | -2.323976 | -0.143932 |
| C | -5.133274 | -3.011554 | 2.177079  |
| C | -5.27647  | -1.022118 | 0.246475  |
| H | -4.645764 | -2.533772 | -1.161492 |
| H | -5.054175 | -3.791131 | 2.929992  |
| C | -5.481352 | -1.72065  | 2.561865  |
| N | -5.16811  | 0.147625  | -0.508955 |
| C | -5.469609 | -0.685912 | 1.612754  |
| H | -5.672474 | -1.502496 | 3.609683  |
| C | -5.070483 | 1.215324  | 0.385478  |
| C | -4.884492 | 0.207092  | -1.938191 |
| C | -5.337508 | 0.754772  | 1.70233   |
| C | -4.513742 | 2.475109  | 0.154031  |
| H | -4.181802 | 1.02843   | -2.109512 |
| H | -4.352773 | -0.709925 | -2.212955 |
| C | -6.124579 | 0.369038  | -2.852992 |
| C | -5.173142 | 1.650609  | 2.770834  |
| C | -4.169863 | 3.281612  | 1.248477  |
| H | -4.156095 | 2.745872  | -0.832616 |
| H | -5.729204 | 0.305011  | -3.880325 |
| C | -6.800703 | 1.747574  | -2.689994 |
| H | -5.412816 | 1.344149  | 3.786067  |
| C | -4.591933 | 2.894326  | 2.543592  |

---



---

|   |           |           |           |
|---|-----------|-----------|-----------|
| C | -3.055587 | 4.249975  | 1.023194  |
| H | -7.810729 | 1.706586  | -3.116787 |
| H | -6.937795 | 1.956382  | -1.620281 |
| C | -6.052736 | 2.91154   | -3.356654 |
| H | -4.380831 | 3.54783   | 3.385763  |
| C | -1.929691 | 4.090263  | 1.843386  |
| C | -2.935058 | 5.011419  | -0.164983 |
| H | -5.991216 | 2.726631  | -4.439638 |
| H | -5.013052 | 2.955187  | -3.001563 |
| C | -6.714429 | 4.273759  | -3.110882 |
| H | -2.007992 | 3.471332  | 2.730337  |
| C | -1.694267 | 5.445549  | -0.621505 |
| H | -3.819614 | 5.189456  | -0.770822 |
| H | -6.762382 | 4.459217  | -2.028717 |
| H | -7.756348 | 4.237923  | -3.459596 |
| C | -5.985479 | 5.432926  | -3.797993 |
| H | -1.620152 | 5.95995   | -1.57647  |
| H | -5.951643 | 5.292519  | -4.885542 |
| H | -6.480898 | 6.390371  | -3.601048 |
| H | -4.949808 | 5.515637  | -3.444549 |
| C | 0.853886  | 3.394109  | 3.074699  |
| H | -0.101645 | 3.082451  | 3.506674  |
| H | 1.387816  | 2.476714  | 2.799818  |
| C | 1.653742  | 4.192216  | 4.130364  |
| C | 0.812746  | 5.380332  | 4.640956  |
| H | -0.040065 | 4.976676  | 5.20885   |
| H | 2.548464  | 4.584063  | 3.627765  |
| H | 0.380943  | 5.895423  | 3.773187  |
| C | 1.519025  | 6.437452  | 5.512527  |
| H | 0.74153   | 7.142665  | 5.834232  |
| H | 1.900897  | 5.984352  | 6.438057  |
| C | 2.652685  | 7.233114  | 4.825549  |
| C | 4.063549  | 6.662617  | 5.024753  |
| H | 2.647221  | 8.259408  | 5.215308  |
| H | 2.437071  | 7.321634  | 3.751516  |
| H | 4.166535  | 5.651047  | 4.617543  |
| H | 4.814326  | 7.291975  | 4.53275   |
| H | 4.3182    | 6.615396  | 6.090946  |
| C | 2.555717  | -0.937837 | -6.31283  |
| H | 3.073976  | -1.048491 | -7.27489  |
| H | 2.053523  | 0.0389    | -6.35379  |
| C | 1.501644  | -2.046887 | -6.195457 |
| H | 1.972331  | -3.037628 | -6.1792   |
| H | 0.895276  | -1.953046 | -5.287368 |
| H | 0.813285  | -2.021676 | -7.047861 |
| C | -0.001545 | -6.608646 | 4.178086  |
| H | -0.761257 | -6.094817 | 4.787071  |
| H | 0.627621  | -7.15868  | 4.891208  |
| C | -0.685143 | -7.626597 | 3.256496  |
| H | -1.170459 | -8.408248 | 3.85279   |
| H | -1.451456 | -7.171752 | 2.623631  |

---

|   |           |           |           |
|---|-----------|-----------|-----------|
| H | 0.042218  | -8.115096 | 2.597184  |
| C | 2.105562  | 3.262213  | 5.276005  |
| H | 2.476669  | 3.878224  | 6.103432  |
| H | 1.226576  | 2.730746  | 5.671322  |
| C | 3.196975  | 2.249677  | 4.903624  |
| H | 2.870366  | 1.542116  | 4.133276  |
| H | 4.093711  | 2.75784   | 4.52776   |
| H | 3.494787  | 1.660403  | 5.778331  |
| C | -7.117688 | -0.798846 | -2.668836 |
| H | -6.554008 | -1.738204 | -2.595035 |
| H | -7.637925 | -0.684739 | -1.708878 |
| C | -8.142889 | -0.94182  | -3.800411 |
| H | -8.787466 | -0.060804 | -3.892359 |
| H | -7.646498 | -1.091712 | -4.76745  |
| H | -8.794858 | -1.804861 | -3.624808 |

No imaginary frequency

Table S 11. Atomic coordinates of [8]CPP4N after geometry optimization (methyl chains have been used instead of ethylhexyl substituents, b3lyp/6-31g(d),  $E=-2222.24976$  Hartree)

| Atoms | X (Å)   | Y (Å)   | Z (Å)   |
|-------|---------|---------|---------|
| N     | -0.9757 | 4.6138  | 1.6313  |
| C     | 0.0867  | 5.0191  | 0.8271  |
| C     | -2.1118 | 4.5541  | 0.8278  |
| C     | -0.8267 | 3.9112  | 2.8875  |
| N     | -4.6143 | -0.9757 | -1.6314 |
| C     | -4.5544 | -2.1117 | -0.8278 |
| C     | -5.0195 | 0.0867  | -0.8271 |
| N     | 4.6143  | 0.9758  | -1.6314 |
| C     | 5.0195  | -0.0867 | -0.8271 |
| C     | 4.5544  | 2.1118  | -0.8279 |
| C     | -3.2593 | 3.7915  | 1.0427  |
| C     | -1.8334 | 5.1563  | -0.4278 |
| C     | -4.1476 | 3.5891  | -0.0242 |
| H     | -3.3594 | 3.1916  | 1.941   |
| C     | -3.9607 | 4.3266  | -1.2184 |
| C     | -4.9613 | 2.3385  | 0.0263  |
| C     | -4.7874 | 1.4449  | -1.0414 |
| C     | -5.5591 | 1.8681  | 1.2206  |
| C     | -5.8108 | 0.5132  | 1.4223  |
| H     | -5.7465 | 2.5707  | 2.0282  |
| C     | -5.457  | -0.4124 | 0.4284  |
| H     | -6.1933 | 0.1728  | 2.3813  |
| C     | -5.1565 | -1.8334 | 0.4279  |
| H     | -4.2804 | 1.7799  | -1.94   |
| C     | -2.824  | 5.1053  | -1.4208 |
| H     | -4.6798 | 4.2139  | -2.0253 |
| H     | -2.6684 | 5.5931  | -2.3799 |
| C     | -0.4124 | 5.4567  | -0.4284 |
| C     | 0.5132  | 5.8106  | -1.4222 |
| C     | 1.8681  | 5.559   | -1.2205 |
| H     | 0.1728  | 6.1932  | -2.3812 |

---

|   |         |         |         |
|---|---------|---------|---------|
| C | 2.3385  | 4.9611  | -0.0262 |
| H | 2.5707  | 5.7465  | -2.0281 |
| C | 1.445   | 4.787   | 1.0414  |
| C | 3.5892  | 4.1476  | 0.0242  |
| C | 3.7917  | 3.2593  | -1.0428 |
| C | 4.3267  | 3.9607  | 1.2185  |
| H | 3.1919  | 3.3594  | -1.9411 |
| C | 5.1565  | 1.8335  | 0.4278  |
| C | 5.1054  | 2.8239  | 1.4208  |
| C | 5.457   | 0.4125  | 0.4284  |
| H | 5.5932  | 2.6684  | 2.3799  |
| H | 4.2138  | 4.6797  | 2.0254  |
| H | 1.7799  | 4.28    | 1.9399  |
| H | -0.0202 | 4.3686  | 3.4661  |
| H | -0.6011 | 2.8442  | 2.7452  |
| H | -2.8448 | -0.6005 | -2.7451 |
| H | -4.003  | -1.7488 | -3.4666 |
| C | -3.9116 | -0.8266 | -2.8875 |
| C | -3.7917 | -3.2592 | -1.0427 |
| C | -5.1054 | -2.8239 | 1.4209  |
| C | -3.5891 | -4.1475 | 0.0242  |
| H | -3.1919 | -3.3594 | -1.9411 |
| C | -4.3266 | -3.9606 | 1.2185  |
| H | -5.5931 | -2.6683 | 2.38    |
| C | -2.3385 | -4.9611 | -0.0263 |
| H | -4.2137 | -4.6796 | 2.0254  |
| C | -1.4449 | -4.7869 | 1.0413  |
| C | -1.8681 | -5.559  | -1.2206 |
| C | -0.0867 | -5.0191 | 0.827   |
| H | -1.7798 | -4.2797 | 1.9398  |
| H | -2.5707 | -5.7465 | -2.0281 |
| C | -0.5133 | -5.8106 | -1.4222 |
| N | 0.9757  | -4.6138 | 1.6312  |
| C | 0.4124  | -5.4567 | -0.4285 |
| H | -0.1729 | -6.1932 | -2.3812 |
| C | 2.1118  | -4.5541 | 0.8278  |
| C | 0.827   | -3.9117 | 2.8878  |
| C | 1.8335  | -5.1563 | -0.4279 |
| C | 3.2593  | -3.7914 | 1.0427  |
| H | 0.6019  | -2.8446 | 2.7461  |
| H | 0.0205  | -4.3692 | 3.4662  |
| C | 2.824   | -5.1053 | -1.4209 |
| C | 4.1477  | -3.589  | -0.0242 |
| H | 3.3592  | -3.1915 | 1.9409  |
| H | 2.6685  | -5.5931 | -2.3799 |
| C | 3.9608  | -4.3266 | -1.2184 |
| C | 4.9613  | -2.3384 | 0.0262  |
| H | 4.6798  | -4.2139 | -2.0254 |
| C | 4.7874  | -1.4449 | -1.0414 |
| C | 5.5591  | -1.868  | 1.2206  |
| H | 4.2804  | -1.7799 | -1.94   |

---

|   |         |         |         |
|---|---------|---------|---------|
| C | 5.8107  | -0.5132 | 1.4222  |
| H | 5.7464  | -2.5706 | 2.0281  |
| H | 6.1932  | -0.1728 | 2.3812  |
| C | 3.9112  | 0.8266  | -2.8874 |
| H | 4.3688  | 0.0204  | -3.4663 |
| H | 2.8445  | 0.6005  | -2.7447 |
| H | -4.3692 | -0.0204 | -3.4663 |
| H | 1.7492  | -4.0043 | 3.4669  |
| H | 4.0025  | 1.7488  | -3.4665 |
| H | -1.7488 | 4.0031  | 3.4667  |

No imaginary frequency

Table S 12. Atomic coordinates of [8]CPP in the geometry of [8]CPP4N

| Atoms | X (Å)      | Y (Å)      | Z (Å)      |
|-------|------------|------------|------------|
| C     | 4.38772747 | -0.4614569 | 1.92889913 |
| C     | 4.18764286 | 1.77563225 | 2.06376614 |
| C     | -1.5808285 | 5.16956796 | -0.7717111 |
| C     | 0.59462065 | 5.35908257 | -0.235844  |
| C     | -0.6816288 | -4.4981125 | -1.3697701 |
| C     | 1.49725629 | -4.3351149 | -0.8313581 |
| C     | 3.54032449 | 3.00182817 | 2.22666715 |
| C     | 5.03596999 | 1.51806346 | 0.95456306 |
| C     | 3.69340424 | 3.98579028 | 1.23922908 |
| H     | 2.77122441 | 3.12006897 | 2.98221521 |
| C     | 4.66411936 | 3.79216552 | 0.22582401 |
| C     | 2.5637249  | 4.95113105 | 1.09408307 |
| C     | 1.93576685 | 4.97889888 | -0.159858  |
| C     | 1.89176871 | 5.51076191 | 2.20799415 |
| C     | 0.5625805  | 5.91632357 | 2.12317814 |
| H     | 2.39957573 | 5.54504704 | 3.16813622 |
| C     | -0.1343855 | 5.76055437 | 0.91472606 |
| H     | 0.04711937 | 6.26439546 | 3.01491421 |
| C     | -1.5379026 | 5.641361   | 0.56835503 |
| H     | 2.42287001 | 4.51415198 | -1.0095541 |
| C     | 5.33294274 | 2.57945561 | 0.084842   |
| H     | 4.82747617 | 4.57936562 | -0.5052601 |
| H     | 6.01314385 | 2.43272679 | -0.7505401 |
| C     | 5.16800739 | 0.07610339 | 0.86940905 |
| C     | 5.65212764 | -0.8007175 | -0.114576  |
| C     | 5.22221698 | -2.1241238 | -0.1303    |
| H     | 6.28894161 | -0.4306824 | -0.9143381 |
| C     | 4.30847004 | -2.611072  | 0.83600005 |
| H     | 5.52497318 | -2.7748337 | -0.9462361 |
| C     | 3.9776268  | -1.7961581 | 1.92804313 |
| C     | 3.37418127 | -3.7425584 | 0.55939203 |
| C     | 2.74785822 | -3.7299205 | -0.6953231 |
| C     | 2.82916545 | -4.5497446 | 1.5877161  |
| H     | 3.13326408 | -3.0836854 | -1.4764171 |
| C     | 0.86920843 | -5.0078501 | 0.24998201 |
| C     | 1.59743553 | -5.1810849 | 1.43769409 |
| C     | -0.5347296 | -5.1158405 | -0.098291  |

---

|   |            |            |            |
|---|------------|------------|------------|
| H | 1.16676464 | -5.7283641 | 2.27258516 |
| H | 3.3459595  | -4.6083924 | 2.54193617 |
| H | 3.23802384 | -2.1459373 | 2.63983118 |
| C | -2.7342544 | 4.59112161 | -1.3043921 |
| C | -2.7283407 | 5.65039771 | 1.31197108 |
| C | -3.8596884 | 4.4313393  | -0.482721  |
| H | -2.7045632 | 4.07953258 | -2.2600462 |
| C | -3.8699056 | 5.04739834 | 0.79207105 |
| H | -2.7400998 | 6.04531073 | 2.32484916 |
| C | -4.7757402 | 3.30739498 | -0.8389841 |
| H | -4.7629426 | 4.9744851  | 1.40692909 |
| C | -4.9555869 | 2.32397485 | 0.143932   |
| C | -5.1332751 | 3.01155286 | -2.1770792 |
| C | -5.2764706 | 1.02211668 | -0.246475  |
| H | -4.645765  | 2.53377095 | 1.16149208 |
| H | -5.0541763 | 3.79112994 | -2.9299922 |
| C | -5.4813528 | 1.72064868 | -2.5618652 |
| C | -5.4696095 | 0.6859106  | -1.6127541 |
| H | -5.6724748 | 1.50249461 | -3.6096833 |
| C | -5.070483  | -1.2153254 | -0.385478  |
| C | -5.3375082 | -0.7547735 | -1.7023301 |
| C | -4.5137416 | -2.4751104 | -0.154031  |
| C | -5.1731419 | -1.6506105 | -2.7708342 |
| C | -4.1698624 | -3.2816133 | -1.2484771 |
| H | -4.1560945 | -2.7458733 | 0.83261605 |
| H | -5.412816  | -1.3441505 | -3.7860673 |
| C | -4.5919325 | -2.8943274 | -2.5435922 |
| C | -3.0555861 | -4.2499761 | -1.0231941 |
| H | -4.3808303 | -3.5478314 | -3.3857633 |
| C | -1.92969   | -4.0902638 | -1.8433861 |
| C | -2.9350568 | -5.0114201 | 0.164983   |
| H | -2.0079912 | -3.4713328 | -2.7303372 |
| C | -1.6942656 | -5.4455498 | 0.62150504 |
| H | -3.8196129 | -5.1894574 | 0.77082204 |
| H | -1.6201505 | -5.9599508 | 1.5764701  |
| H | 4.04041547 | 1.00858061 | 2.79510456 |
| H | 4.10831011 | 0.17093954 | 2.74553903 |
| H | -5.3789834 | 0.26189438 | 0.49948287 |
| H | -5.3007638 | -0.58367   | 0.44691742 |
| H | 0.99806797 | -4.2908245 | -1.7767413 |
| H | 0.18465314 | -4.3420537 | -1.9781296 |
| H | 0.10303487 | 5.34765495 | -1.1861665 |
| H | -0.7094341 | 5.25980242 | -1.3860641 |

---

## 9 Bibliography

- (1) Kohn, P. H. a. W. Inhomogeneous Electron Gas. *Phys. Rev.*, **136**, B864.
- (2) Calais, J.-L. Density-Functional Theory of Atoms and Molecules. . *Int. J. Quantum Chem.* **1993**, *47*, 101.
- (3) Becke, A. D. A new mixing of Hartree–Fock and local density-functional theories *J. Phys. Chem.* **1993**, *98*, 1372.
- (4) Becke, A. D. Density-functional thermochemistry. III. The role of exact exchange *J. Phys. Chem.* **1993**, *98*, 5648.
- (5) Becke, A. D. Density-functional exchange-energy approximation with correct asymptotic behavior. *Phys. Rev. A* **1988**, *38*, 3098.
- (6) Lee C., Y. W. a. R. G. P. Development of the Colle-Salvetti correlation-energy formula into a functional of the electron density. *phys. rev. B* **1988**, *37*, 785.
- (7) M. J. Frisch, G. W. T., H. B. Schlegel, G. E. Scuseria, M. A. Robb, J. R. Cheeseman, G. Scalmani, V. Barone, B. Mennucci, G. A. Petersson, H. Nakatsuji, M. Caricato, X. Li, H. P. Hratchian, A. F. Izmaylov, J. Bloino, G. Zheng, J. L. Sonnenberg, M. Hada, M. Ehara, K. Toyota, R. Fukuda, J. Hasegawa, M. Ishida, T. Nakajima, Y. Honda, O. Kitao, H. Nakai, T. Vreven, J. A. J. Montgomery, J. E. Peralta, F. Ogliaro, M. Bearpark, J. J. Heyd, E. Brothers, K. N. Kudin, V. N. Staroverov, T. Keith, R. Kobayashi, J. Normand, K. Raghavachari, A. Rendell, J. C. Burant, S. S. Iyengar, J. Tomasi, M. Cossi, N. Rega, J. M. Millam, M. Klene, J. E. Knox, J. B. Cross, V. Bakken, C. Adamo, J. Jaramillo, R. Gomperts, R. E. Stratmann, O. Yazyev, A. J. Austin, R. Cammi, C. Pomelli, J. W. Ochterski, R. L. Martin, K. Morokuma, V. G. Zakrzewski, G. A. Voth, P. Salvador, J. J. Dannenberg, S. Dapprich, A. D. Daniels, O. Farkas, J. B. Foresman, J. V. Ortiz, J. Cioslowski, D. J. Fox. **2010**, Gaussian 09, Revision B.01, Gaussian, Inc., Wallingford CT, 2010.
